# Supplementary material for: C–H chlorination of (hetero)anilines via photo/organo co-catalysis
Source: Royal Society of Chemistry journal article supplement (doi:10.1039/d2ob00834c), 2022-01-01
Supplement: d2ob00834c1.pdf [file d2ob00834c1.pdf]

## C–H Chlorination of (hetero)anilines via photo-redox/organo co-catalysis

Wuchen Xie,<sup>a</sup> Meng Wang,<sup>a</sup> Siyu Yang,<sup>a</sup> Yadong Chen<sup>\*a</sup>, Jie Feng<sup>\*a</sup> and Yatian  
Huang<sup>\*a</sup>

<sup>a</sup>Key Laboratory of Natural Medicines, Department of Organic Chemistry,  
China Pharmaceutical University, Nanjing, 210009, P.R. China

### Supporting Information

|                                                              |     |
|--------------------------------------------------------------|-----|
| 1. General information                                       | S1  |
| 2. Optimization of the reaction parameters                   | S1  |
| 3. LC-MS for radical capture experiments                     | S3  |
| 4. General Experimental Procedures and Characterization Data | S5  |
| 5. Gram-scale synthesis and E Factor calculations            | S18 |
| 6. Stern Volmer Fluorescence Quenching                       | S18 |
| 7. Other examples examined                                   | S20 |
| 8. Copies of NMR spectra                                     | S21 |
| 9. References                                                | S90 |

## 1. General information

Unless otherwise noted, all reactants or reagents including dry solvents were obtained from commercial suppliers and used as received. All the reactions were conducted using reaction tube (25 mL). The reactions were performed under argon atmosphere. Blue LEDs (10W, equipped with a thermostank) was used as light source. Analytical thin layer chromatography (TLC) was performed using Silica Gel 60 F25 plates. Column chromatograph was performed on silica gel 200~300 mesh. An Edinburgh Instruments Spectrofluorometer FS5 was used in the emission measurement.  $^1\text{H}$  and  $^{13}\text{C}$  NMR spectra were obtained in  $\text{CDCl}_3$  or DMSO using 300 MHz, 400 MHz Varian NMR spectrometer. Chemical shifts in  $^1\text{H}$  NMR spectra are reported in parts per million (ppm) on the  $\delta$  scale from an internal standard of residual  $\text{CDCl}_3$  (7.26 ppm). Data are reported as follows: chemical shift, multiplicity (s = singlet, d = doublet, t = triplet, q = quartet, m = multiplet), integration, and coupling constant in Hertz (Hz). Chemical shifts in  $^{13}\text{C}$  NMR spectra are reported in ppm on the  $\delta$  scale from the central peak of residual  $\text{CDCl}_3$  (77.16 ppm).

## 2. Optimization of the reaction parameters

Table S1. Condition evaluations for chlorination of aniline **1a** with NCS (1.1 equivalents)

| Entry | PC*/light (LEDs) | Acid                                          | Solvent                | Time/min | Yield of <b>2a/2a'/3a</b> |
|-------|------------------|-----------------------------------------------|------------------------|----------|---------------------------|
| 1     | -/-              | 20% $\text{BrCF}_2\text{COOH}$                | $\text{CH}_3\text{CN}$ | 30       | 15/1.1/1.2                |
| 2     | -/Blue           | 20% $\text{BrCF}_2\text{COOH}$                | $\text{CH}_3\text{CN}$ | 30       | 43/3.2/2.6                |
| 3     | 0.1% 4CzIPN/Blue | -                                             | $\text{CH}_3\text{CN}$ | 30       | 80/6/7                    |
| 4     | 0.1% 4CzIPN/Blue | 20% $\text{BrCF}_2\text{COOH}$                | $\text{CH}_3\text{CN}$ | 30       | 68/5/0.9                  |
| 5     | 0.1% 4CzIPN/Blue | 20%<br>$\text{Br}(\text{CH}_2)_2\text{CCOOH}$ | $\text{CH}_3\text{CN}$ | 30       | 83/6/2.7                  |
| 6     | 0.1% 4CzIPN/Blue | 20% $\text{BrCH}_2\text{COOH}$                | $\text{CH}_3\text{CN}$ | 30       | 78/6/1.5                  |
| 7     | 0.1% 4CzIPN/Blue | 20% $\text{CH}_3\text{COOH}$                  | $\text{CH}_3\text{CN}$ | 30       | 83/6/4                    |

|    |                                       |                                                |                    |    |            |
|----|---------------------------------------|------------------------------------------------|--------------------|----|------------|
| 8  | 0.1% 4CzIPN/Blue                      | 5% BrCF <sub>2</sub> COOH                      | CH <sub>3</sub> CN | 30 | 74/5/2.6   |
| 9  | 0.1% 4CzIPN/Blue                      | 10% BrCF <sub>2</sub> COOH                     | CH <sub>3</sub> CN | 30 | 70/5/1.6   |
| 10 | 0.1% 4CzIPN/Blue                      | 50% BrCF <sub>2</sub> COOH                     | CH <sub>3</sub> CN | 30 | 50/3/0.5   |
| 11 | 0.1% 4CzIPN/Blue                      | 20% BrCF <sub>2</sub> COOH                     | THF                | 60 | 95/4/0.9   |
| 12 | 0.1% 4CzIPN/Blue                      | 20% BrCF <sub>2</sub> COOH                     | CH <sub>3</sub> CN | 60 | 86/6/1.4   |
| 13 | 0.1% 4CzIPN/Blue                      | 20% BrCF <sub>2</sub> COOH                     | DMSO               | 60 | 84/4/0.8   |
| 14 | 0.1% 4CzIPN/Blue                      | 20% BrCF <sub>2</sub> COOH                     | DMF                | 60 | 78/7/2     |
| 15 | 0.1% 4CzIPN/Blue                      | 20% BrCF <sub>2</sub> COOH                     | H <sub>2</sub> O   | 60 | 78/4/1.1   |
| 16 | 2% Eosin Y/Green                      | 20% BrCF <sub>2</sub> COOH                     | CH <sub>3</sub> CN | 30 | 58/4/2.4   |
| 17 | 2% Acr-Mes/Blue                       | 20% BrCF <sub>2</sub> COOH                     | CH <sub>3</sub> CN | 30 | 10/-/-     |
| 18 | 2% R6G/Blue                           | 20% BrCF <sub>2</sub> COOH                     | CH <sub>3</sub> CN | 30 | 62/5/1.8   |
| 19 | 0.1% 4CzIPN/Blue                      | 20%<br>Br(CH <sub>2</sub> ) <sub>2</sub> CCOOH | CH <sub>3</sub> CN | 15 | 79/6/5     |
| 20 | 0.1% 4CzIPN/Blue                      | 20%<br>Br(CH <sub>2</sub> ) <sub>2</sub> CCOOH | CH <sub>3</sub> CN | 45 | 82/6.5/5.2 |
| 21 | 0.1% 4CzIPN/Blue                      | 20%<br>Br(CH <sub>2</sub> ) <sub>2</sub> CCOOH | CH <sub>3</sub> CN | 60 | 81/6.5/5.1 |
| 22 | 0.1% 4CzIPN/Blue                      | 20% BrCH <sub>2</sub> COOH                     | CH <sub>3</sub> CN | 15 | 57/5/2.2   |
| 23 | 0.1% 4CzIPN/Blue                      | 20% BrCH <sub>2</sub> COOH                     | CH <sub>3</sub> CN | 45 | 81/6.1/2.9 |
| 24 | 0.1% 4CzIPN/Blue                      | 20% BrCH <sub>2</sub> COOH                     | CH <sub>3</sub> CN | 60 | 81/6/3     |
| 25 | 0.1% 4CzIPN/Blue                      | 20% CH <sub>3</sub> COOH                       | CH <sub>3</sub> CN | 15 | 75/5.8/5   |
| 26 | 0.1% 4CzIPN/Blue                      | 20% CH <sub>3</sub> COOH                       | CH <sub>3</sub> CN | 45 | 76/6/5.3   |
| 27 | 0.1% 4CzIPN/Blue                      | 20% CH <sub>3</sub> COOH                       | CH <sub>3</sub> CN | 60 | 74/6/5.8   |
| 28 | 0.1% 4CzIPN/Blue                      | 20% BrCF <sub>2</sub> COOH                     | THF                | 30 | 89/4/0.9   |
| 29 | 0.1% 4CzIPN/Blue                      | 20% BrCF <sub>2</sub> COOH                     | THF                | 15 | 75/2.4/0.6 |
| 30 | 0.1% 4CzIPN/Solar<br>light (14:00 pm) | 20% BrCF <sub>2</sub> COOH                     | THF                | 30 | 88/3.7/0.8 |
| 31 | 0.1% 4CzIPN/solar<br>light (10:00 am) | 20% BrCF <sub>2</sub> COOH                     | THF                | 30 | 60/2.9/1.1 |

Table S2. Condition evaluations for chlorination of aniline **1a** with NCS (2 equivalents)

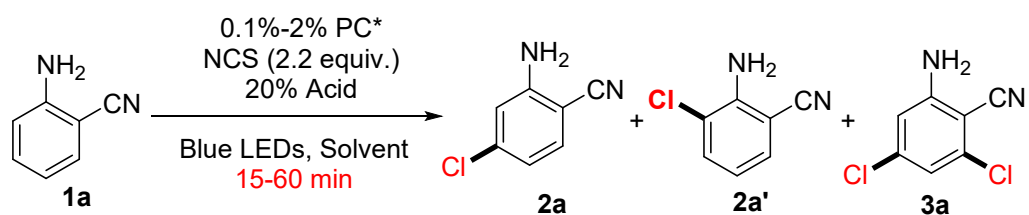

| Entry          | PC*/light<br>(LEDs) | Acid                                           | Solvent            | Time/<br>min | Yield of<br><b>2a/2a'/3a</b> |
|----------------|---------------------|------------------------------------------------|--------------------|--------------|------------------------------|
| 1              | -/-                 | 20% BrCF <sub>2</sub> COOH                     | CH <sub>3</sub> CN | 30           | 24/2.3/2.6                   |
| 2              | -/Blue              | 20% BrCF <sub>2</sub> COOH                     | CH <sub>3</sub> CN | 30           | 45/4/2.9                     |
| 3              | 0.1% 4CzIPN/Blue    | -                                              | CH <sub>3</sub> CN | 30           | 7/4.2/88                     |
| 4              | 0.1% 4CzIPN/Blue    | 20% BrCF <sub>2</sub> COOH                     | CH <sub>3</sub> CN | 30           | 70/5/25                      |
| 5              | 0.1% 4CzIPN/Blue    | 20%<br>Br(CH <sub>2</sub> ) <sub>2</sub> CCOOH | CH <sub>3</sub> CN | 30           | 15/5/80                      |
| 6              | 0.1% 4CzIPN/Blue    | 20% BrCH <sub>2</sub> COOH                     | CH <sub>3</sub> CN | 30           | 19/5.5/76                    |
| 7              | 0.1% 4CzIPN/Blue    | 20% CH <sub>3</sub> COOH                       | CH <sub>3</sub> CN | 30           | 16/5.5/74                    |
| 8 <sup>a</sup> | 0.1% 4CzIPN/Blue    | 20% BrCF <sub>2</sub> COOH                     | CH <sub>3</sub> CN | 30           | 93/4/1.3                     |
| 9 <sup>b</sup> | 0.1% 4CzIPN/Blue    | 20% BrCF <sub>2</sub> COOH                     | CH <sub>3</sub> CN | 30           | 85/3.9/10                    |

<sup>a</sup> NCS (1.2 equivalents); <sup>b</sup> NCS (1.5 equivalents)

### 3. LC-Ms for radical capture experiments

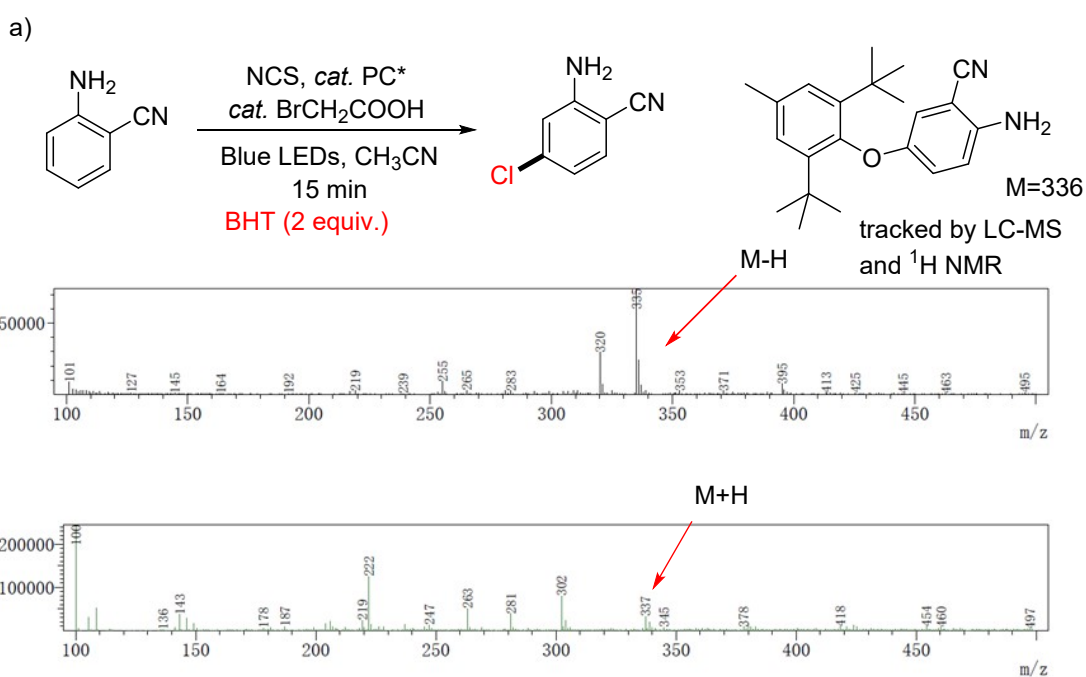

## 4. General Experimental Procedures and Characterization Data

### General procedure for selective chlorination

**Condition A** (for substrates **2a-2ad**, **4a-4h**) A 10 mL quartz tube was charged with amine (0.2 mmol), 2-bromo-2,2-difluoroacetic acid (0.04 mmol), photocatalyst (4CzIPN, 0.01 M, pre-dissolved in THF, 0.2 mL) and THF (2 mL) in sequence. The tube was seal with a rubber septum and protected with Nitrogen via bubbling using a springe. After that NCS (0.22 mmol, 1.1 equivalents, pre-dissolved in THF) was added. The mixture was then stirred with a Teflon® stir bar under the irritation of Blue LEDs (10W, equipped with a thermotank). Upon completion of the reaction, the mixture was diluted with ethyl acetate (3 mL) and washed with saturated NaHCO<sub>3</sub> aqueous solution (5 mL). The organic layer was concentrated and purified via a flash column (PE/EA from 10/1 to 3/1) or recrystallization (Ethanol/Water). Note: specific solvent was used for products **4c-4h**. The purified of **4d**, **4g** and **4h** was taken via a flash column (DCM/Methanol from 30/1 to 10/1)

**Condition B** (for substrates **3a-3c**, **3e**, **3t**) A 10 mL quartz tube was charged with amine (0.2 mmol), 2-bromo-2,2-difluoroacetic acid (0.04 mmol), photocatalyst (4CzIPN, 0.01 M, pre-dissolved in THF, 0.2 mL) and THF (2 mL) in sequence. The tube was seal with a rubber septum and protected with Nitrogen via bubbling using a springe. After that NCS (0.44 mmol, 2.2 equivalents, pre-dissolved in THF) was added. The mixture was then stirred with a Teflon® stir bar under the irritation of Blue LEDs (10W, equipped with a thermotank). Upon completion of the reaction, the mixture was diluted with ethyl acetate (3 mL) and washed with saturated NaHCO<sub>3</sub> aqueous solution (5 mL). The organic layer was concentrated and purified via a flash column (PE/EA from 10/1 to 3/1) or recrystallization (Methanol/Water).

*2-amino-5-chlorobenzonitrile* **2a**. The title compound was obtained according to general condition A using the following amounts and conditions: 2-aminobenzonitrile (23.6 mg, 0.2 mmol), 2-bromo-2,2-difluoroacetic acid (7 mg, 0.04 mmol), photocatalyst (4CzIPN, 0.01 M, pre-dissolved in THF, 0.2 mL), NCS (29.4 mg, 0.22 mmol) and THF (2 mL). The crude product was purified by silica gel filtration (eluent: petroleum ether/ethyl acetate=1/10) to provide the desired compound as a white solid (27.1 mg, 89% yield).

<sup>1</sup>H NMR (300 MHz, CDCl<sub>3</sub>) δ 7.37 (d, *J* = 2.5 Hz, 1H), 7.35 – 7.25 (m, 1H), 6.71 (d, *J* = 8.9 Hz, 1H), 4.47 (s, 2H). GC-MS(EI):152 m/z. The reported data was identical to the literature.<sup>1</sup>

*4-amino-3-chlorobenzonitrile* **2b**. The title compound was obtained according to general condition A using the following amounts and conditions: 4-aminobenzonitrile (23.6 mg, 0.2 mmol), 2-bromo-2,2-difluoroacetic acid (7 mg, 0.04 mmol), photocatalyst (4CzIPN, 0.01 M, pre-dissolved in THF, 0.2 mL), NCS (29.4 mg, 0.22 mmol) and THF (2 mL). The crude product was purified by silica gel filtration (eluent: petroleum ether/ethyl acetate=1/10) to provide the desired compound as a white solid (29.0 mg, 95% yield).

$^1\text{H}$  NMR (300 MHz,  $\text{CDCl}_3$ )  $\delta$  7.54 (d,  $J = 1.9$  Hz, 1H), 7.35 (dd,  $J = 8.4, 1.9$  Hz, 1H), 6.77 (d,  $J = 8.4$  Hz, 1H), 4.57 (s, 2H). GC-MS(ED):152 m/z.

The  $^1\text{H}$  NMR shifts are identical to the literature.<sup>2</sup>

**4-amino-5-chloro-2-(trifluoromethyl)benzonitrile 2c.** The title compound was obtained according to general condition A using the following amounts and conditions: 4-amino-2-(trifluoromethyl)benzonitrile (37.2 mg, 0.2 mmol), 2-bromo-2,2-difluoroacetic acid (7 mg, 0.04 mmol), photocatalyst (4CzIPN, 0.01 M, pre-dissolved in THF, 0.2 mL), NCS (29.4 mg, 0.22 mmol) and THF (2 mL). The crude product was purified by silica gel filtration (eluent: petroleum ether/ ethyl acetate=1/10) to provide the desired compound as a white solid (35.2 mg, 79% yield).

$^1\text{H}$  NMR (300 MHz,  $\text{CDCl}_3$ )  $\delta$  7.67 (s, 1H), 7.10 (s, 1H), 4.99 (s, 2H).

$^{13}\text{C}$  NMR (75 MHz,  $\text{CDCl}_3$ )  $\delta$  147.1, 135.5, 132.7 ( $^2J_{\text{C-F}}=33$  Hz), 120.3, 118.6 ( $^1J_{\text{C-F}}=270$  Hz), 115.8, 112.6 ( $^3J_{\text{C-F}}=4.5$  Hz), 97.3.

HRMS Calcd. For  $\text{C}_8\text{H}_5\text{ClF}_3\text{N}_2$   $[\text{M}+\text{H}]^+$ : 221.0088; found 221.0095.

**4-chloro-2,5-difluoroaniline 2d.** The title compound was obtained according to general condition A using the following amounts and conditions: 2,5-difluoroaniline (25.8 mg, 0.2 mmol), 2-bromo-2,2-difluoroacetic acid (7 mg, 0.04 mmol), photocatalyst (4CzIPN, 0.01 M, pre-dissolved in THF, 0.2 mL), NCS (29.4 mg, 0.22 mmol) and THF (2 mL). The crude product was purified by silica gel filtration (eluent: petroleum ether/ ethyl acetate=1/10) to provide the desired compound as a white solid (26.4 mg, 81% yield).

$^1\text{H}$  NMR (300 MHz,  $\text{CDCl}_3$ )  $\delta$  7.04 (dd,  $J = 10.2, 6.6$  Hz, 1H), 6.58 (dd,  $J = 10.0, 7.8$  Hz, 1H), 3.85 (s, 2H).

$^{13}\text{C}$  NMR (75 MHz,  $\text{CDCl}_3$ )  $\delta$  154.7 (dd,  $^1J_{\text{C-F}}=240$  Hz,  $^3J_{\text{C-F}}=3$  Hz), 145.2, 139.0, 134.4 (dd,  $^2J_{\text{C-F}}=10.5$  Hz), 116.7 ( $^2J_{\text{C-F}}=23.3$  Hz), 104.0 ( $^3J_{\text{C-F}}=4.5$  Hz).

HRMS Calcd. For  $\text{C}_6\text{H}_5\text{ClF}_2\text{N}$   $[\text{M}+\text{H}]^+$ : 164.0073; found 164.0075.

**2-amino-3,5-dichlorobenzamide 2e.** The title compound was obtained according to general condition A using the following amounts and conditions: 2-amino-3-chlorobenzamide (34 mg, 0.2 mmol), 2-bromo-2,2-difluoroacetic acid (7 mg, 0.04 mmol), photocatalyst (4CzIPN, 0.01 M, pre-dissolved in THF, 0.2 mL), NCS (29.4 mg, 0.22 mmol) and THF (2 mL). The crude product was purified by silica gel filtration (eluent: petroleum ether/ ethyl acetate=1/5) to provide the desired compound as an off-white solid (32.2 mg, 78% yield).

$^1\text{H}$  NMR (300 MHz, DMSO)  $\delta$  8.04 (s, 1H), 7.65 (d,  $J = 2.4$  Hz, 1H), 7.51 (d,  $J = 2.4$  Hz, 1H), 7.47 (s, 1H), 6.83 (s, 2H).

$^{13}\text{C}$  NMR (75 MHz, DMSO)  $\delta$  169.8, 145.3, 131.6, 127.8, 120.2, 118.0, 116.6.

HRMS Calcd. For  $\text{C}_7\text{H}_6\text{Cl}_2\text{N}_2\text{O}$   $[\text{M}+\text{H}]^+$ : 204.9935; found 204.9940.

**methyl 4-amino-3-chloro-5-methoxybenzoate 2f.** The title compound was obtained according to general condition A using the following amounts and conditions: methyl 4-amino-3-methoxybenzoate (36.2 mg, 0.2 mmol), 2-bromo-2,2-difluoroacetic acid (7 mg, 0.04 mmol), photocatalyst (4CzIPN, 0.01 M, pre-dissolved in THF, 0.2 mL), NCS

(29.4 mg, 0.22 mmol) and THF (2 mL). The crude product was purified by silica gel filtration (eluent: petroleum ether/ ethyl acetate=1/5) to provide the desired compound as a brown solid (37.0 mg, 86% yield).

$^1\text{H}$  NMR (400 MHz,  $\text{CDCl}_3$ )  $\delta$  7.66 (d,  $J$  = 1.7 Hz, 1H), 7.36 (d,  $J$  = 1.8 Hz, 1H), 3.91 (s, 3H), 3.88 (s, 3H).

$^{13}\text{C}$  NMR (101 MHz,  $\text{CDCl}_3$ )  $\delta$  166.5, 146.4, 138.1, 124.0, 118.7, 117.2, 109.3, 56.0, 51.9.

HRMS Calcd. For  $\text{C}_9\text{H}_{10}\text{ClNO}_3$   $[\text{M}+\text{H}]^+$ : 216.0427; found 216.0425.

*methyl 3-amino-5-bromo-6-chloro-2-methylbenzoate 2g*. The title compound was obtained according to general condition A using the following amounts and conditions: methyl 3-amino-5-bromo-2-methylbenzoate (48.6 mg, 0.2 mmol), 2-bromo-2,2-difluoroacetic acid (7 mg, 0.04 mmol), photocatalyst (4CzIPN, 0.01 M, pre-dissolved in THF, 0.2 mL), NCS (29.4 mg, 0.22 mmol) and THF (2 mL). The crude product was purified by silica gel filtration (eluent: petroleum ether/ ethyl acetate=1/5) to provide the desired compound as a yellow solid (43.9 mg, 79% yield).

$^1\text{H}$  NMR (300 MHz,  $\text{CDCl}_3$ )  $\delta$  7.52 (s, 1H), 4.38 (s, 2H), 3.90 (s, 3H), 2.37 (s, 3H).

$^{13}\text{C}$  NMR (75 MHz,  $\text{CDCl}_3$ )  $\delta$  167.3, 143.6, 130.3, 123.3, 122.9, 122.2, 119.5, 52.3, 14.6.

HRMS Calcd. For  $\text{C}_9\text{H}_9\text{BrClNO}_2$   $[\text{M}+\text{H}]^+$ : 277.9583; found 277.9585.

*3,4-dichloro-5-fluoroaniline 2h*. The title compound was obtained according to general condition A using the following amounts and conditions: 3-chloro-5-fluoroaniline (29.0 mg, 0.2 mmol), 2-bromo-2,2-difluoroacetic acid (7 mg, 0.04 mmol), photocatalyst (4CzIPN, 0.01 M, pre-dissolved in THF, 0.2 mL), NCS (29.4 mg, 0.22 mmol) and THF (2 mL). The crude product was purified by silica gel filtration (eluent: petroleum ether/ ethyl acetate=1/5) to provide the desired compound as a yellow oil (23.9 mg, 67% yield).

$^1\text{H}$  NMR (400 MHz,  $\text{CDCl}_3$ )  $\delta$  6.60 (dd,  $J$  = 2.6, 1.6 Hz, 1H), 6.41 (dd,  $J$  = 10.3, 2.6 Hz, 1H), 3.86 (s, 2H).

GC-MS(EI): 179 m/z.

The reported data was identical to the literature.<sup>3</sup>

*4-chloro-2-nitroaniline 2i*. The title compound was obtained according to general condition A using the following amounts and conditions: 2-nitroaniline (27.6 mg, 0.2 mmol), 2-bromo-2,2-difluoroacetic acid (7 mg, 0.04 mmol), photocatalyst (4CzIPN, 0.01 M, pre-dissolved in THF, 0.2 mL), NCS (29.4 mg, 0.22 mmol) and THF (2 mL). The crude product was purified by silica gel filtration (eluent: petroleum ether/ ethyl acetate=1/5) to provide the desired compound as a yellow solid (26.1 mg, 76% yield).

$^1\text{H}$  NMR (300 MHz,  $\text{CDCl}_3$ )  $\delta$  8.13 (d,  $J$  = 2.5 Hz, 1H), 7.32 (dd,  $J$  = 8.9, 2.5 Hz, 1H), 6.78 (d,  $J$  = 8.9 Hz, 1H), 6.07 (s, 2H).

GC-MS(EI): 172 m/z.

The  $^1\text{H}$  NMR shifts are identical to the literature.<sup>4</sup>

*4-bromo-2-chloroaniline 2j*. The title compound was obtained according to general condition A using the following amounts and conditions: 4-bromoaniline (34.2 mg, 0.2 mmol), 2-bromo-2,2-difluoroacetic acid (7 mg, 0.04 mmol), photocatalyst (4CzIPN, 0.01 M, pre-dissolved in THF, 0.2 mL), NCS (29.4 mg, 0.22 mmol) and THF (2 mL). The crude product was purified by silica gel filtration (eluent: petroleum ether/ ethyl acetate=1/10) to provide the desired compound as a white solid (26.2 mg, 63% yield). <sup>1</sup>H NMR (400 MHz, CDCl<sub>3</sub>) δ 7.40 (d, *J* = 2.2 Hz, 1H), 7.18 (dd, *J* = 8.5, 2.2 Hz, 1H), 6.66 (d, *J* = 8.6 Hz, 1H), 4.06 (s, 2H). GC-MS(EI):205 m/z. The <sup>1</sup>H NMR shifts are identical to the literature.<sup>5</sup>

*2,4,6-trichloro-3,5-dimethoxyaniline 2k*. The title compound was obtained according to general condition A using the following amounts and conditions: 2,6-dichloro-3,5-dimethoxyaniline (44.2 mg, 0.2 mmol), 2-bromo-2,2-difluoroacetic acid (7 mg, 0.04 mmol), photocatalyst (4CzIPN, 0.01 M, pre-dissolved in THF, 0.2 mL), NCS (29.4 mg, 0.22 mmol) and THF (2 mL). The crude product was purified by silica gel filtration (eluent: petroleum ether/ ethyl acetate=1/10) to provide the desired compound as a yellow solid (38.8 mg, 76% yield). <sup>1</sup>H NMR (300 MHz, CDCl<sub>3</sub>) δ 4.58 (s, 2H), 3.90 (s, 6H). <sup>13</sup>C NMR (101 MHz, CDCl<sub>3</sub>) δ 152.0, 140.2, 112.0, 110.1, 60.7. HRMS Calcd. For C<sub>8</sub>H<sub>8</sub>Cl<sub>3</sub>NO<sub>2</sub> [M+H]<sup>+</sup>: 255.9699; found 255.9705.

*5-chloro-7-nitro-3,4-dihydro-2H-benzo[b][1,4]oxazine 2l* The title compound was obtained according to general condition A using the following amounts and conditions: 7-nitro-3,4-dihydro-2H-benzo[b][1,4]oxazine (36.0 mg, 0.2 mmol), 2-bromo-2,2-difluoroacetic acid (7 mg, 0.04 mmol), photocatalyst (4CzIPN, 0.01 M, pre-dissolved in THF, 0.2 mL), NCS (29.4 mg, 0.22 mmol) and THF (2 mL). The crude product was purified by silica gel filtration (eluent: petroleum ether/ ethyl acetate=1/3) to provide the desired compound as a yellow oil (34.0 mg, 79% yield). <sup>1</sup>H NMR (400 MHz, CDCl<sub>3</sub>) δ 7.90 (d, *J* = 2.5 Hz, 1H), 7.65 (d, *J* = 2.5 Hz, 1H), 5.08 (s, 1H), 4.33 – 4.23 (m, 2H), 3.64 (td, *J* = 4.5, 2.5 Hz, 2H). <sup>13</sup>C NMR (75 MHz, CDCl<sub>3</sub>) δ 142.3, 137.3, 137.0, 118.7, 117.0, 111.3, 64.1, 40.3. HRMS Calcd. For C<sub>8</sub>H<sub>8</sub>ClN<sub>2</sub>O<sub>3</sub> [M+H]<sup>+</sup>: 215.0223; found 215.0219.

*4-bromo-2-chloro-N,N-dimethylaniline 2m* The title compound was obtained according to general condition A using the following amounts and conditions: 4-bromo-N,N-dimethylaniline (39.9 mg, 0.2 mmol), 2-bromo-2,2-difluoroacetic acid (7 mg, 0.04 mmol), photocatalyst (4CzIPN, 0.01 M, pre-dissolved in THF, 0.2 mL), NCS (29.4 mg, 0.22 mmol) and THF (2 mL). The crude product was purified by silica gel filtration (eluent: petroleum ether/ ethyl acetate=1/3) to provide the desired compound as a yellow oil (39.6 mg, 85% yield). <sup>1</sup>H NMR (300 MHz, CDCl<sub>3</sub>) δ 7.51 (d, *J* = 2.3 Hz, 1H), 7.33 (dd, *J* = 8.6, 2.3 Hz, 1H), 6.94 (d, *J* = 8.6 Hz, 1H), 2.81 (s, 6H). GC-MS(EI):233 m/z.



The  $^1\text{H}$  NMR shifts are identical to the literature.<sup>6</sup>

*2-chloro-3-(4-methylpiperazin-1-yl)-6-nitroaniline* **2n** The title compound was obtained according to general condition A using the following amounts and conditions: 5-(4-methylpiperazin-1-yl)-2-nitroaniline (47.2 mg, 0.2 mmol), 2-bromo-2,2-difluoroacetic acid (7 mg, 0.04 mmol), photocatalyst (4CzIPN, 0.01 M, pre-dissolved in THF, 0.2 mL), NCS (29.4 mg, 0.22 mmol) and THF (2 mL). The crude product was purified by silica gel filtration (eluent: petroleum ether/ ethyl acetate=1/3) to provide the desired compound as a brown solid (42.3 mg, 78% yield).

$^1\text{H}$  NMR (300 MHz,  $\text{CDCl}_3$ )  $\delta$  8.06 (d,  $J$  = 9.5 Hz, 1H), 6.69 (s, 2H), 6.42 (d,  $J$  = 9.5 Hz, 1H), 3.38 – 3.07 (m, 4H), 2.60 (t,  $J$  = 4.8 Hz, 4H), 2.36 (s, 3H).

$^{13}\text{C}$  NMR (75 MHz,  $\text{CDCl}_3$ )  $\delta$  155.3, 143.2, 128.3, 125.7, 112.3, 108.2, 55.0, 50.5, 46.1. HRMS Calcd. For  $\text{C}_{11}\text{H}_{15}\text{ClN}_4\text{O}_2$   $[\text{M}+\text{H}]^+$ : 271.0962; found 271.0961.

*N-(4-chlorophenyl)acetamide* **2o** The title compound was obtained according to general condition A using the following amounts and conditions: N-phenylacetamide (27.0 mg, 0.2 mmol), 2-bromo-2,2-difluoroacetic acid (7 mg, 0.04 mmol), photocatalyst (4CzIPN, 0.01 M, pre-dissolved in THF, 0.2 mL), NCS (29.4 mg, 0.22 mmol) and THF (2 mL). The crude product was purified by recrystallization (ethanol/water =1/3) to provide the desired compound as a colorless solid (25.1 mg, 74% yield).

$^1\text{H}$  NMR (300 MHz,  $\text{DMSO-d}_6$ )  $\delta$  10.08 (s, 1H), 8.08 – 7.50 (m, 2H), 7.50 – 6.94 (m, 2H), 2.07 (s, 3H).

GC-MS(EI):169 m/z.

The  $^1\text{H}$  NMR shifts are identical to the literature.<sup>4</sup>

*4-chloro-N-phenylaniline* **2p** The title compound was obtained according to general condition A using the following amounts and conditions: diphenylamine (33.8 mg, 0.2 mmol), 2-bromo-2,2-difluoroacetic acid (7 mg, 0.04 mmol), photocatalyst (4CzIPN, 0.01 M, pre-dissolved in THF, 0.2 mL), NCS (29.4 mg, 0.22 mmol) and THF (2 mL). The crude product was purified by silica gel filtration (eluent: petroleum ether/ ethyl acetate=1/10) to provide the desired compound as a yellow solid (23 mg, 56% yield).

$^1\text{H}$  NMR (300 MHz,  $\text{CDCl}_3$ )  $\delta$  7.43 – 7.21 (m, 4H), 7.20 – 6.98 (m, 5H), 5.72 (s, 1H).

GC-MS(EI):203 m/z.

The  $^1\text{H}$  NMR shifts are identical to the literature.<sup>7</sup>

*N-(4-chlorophenyl)pyrimidin-2-amine* **2q**. The title compound was obtained according to general condition A using the following amounts and conditions: N-phenylpyrimidin-2-amine (34.2 mg, 0.2 mmol), 2-bromo-2,2-difluoroacetic acid (7 mg, 0.04 mmol), photocatalyst (4CzIPN, 0.01 M, pre-dissolved in THF, 0.2 mL), NCS (29.4 mg, 0.22 mmol) and THF (2 mL). The crude product was purified by silica gel filtration (eluent: petroleum ether/ ethyl acetate=1/10) to provide the desired compound as a yellow solid (25 mg, 60% yield).

$^1\text{H}$  NMR (300 MHz,  $\text{CDCl}_3$ )  $\delta$  8.45 (d,  $J = 4.8$  Hz, 2H), 7.66 – 7.56 (m, 2H), 7.46 (d,  $J = 2.8$  Hz, 1H), 7.35 – 7.29 (m, 2H), 6.77 (t,  $J = 4.8$  Hz, 1H).

GC-MS(EI):205m/z.

The  $^1\text{H}$  NMR shifts are identical to the literature.<sup>7</sup>

*methyl 3-chloro-1H-indazole-6-carboxylate 2r* The title compound was obtained according to general condition A using the following amounts and conditions: methyl 1H-indazole-6-carboxylate (35.2 mg, 0.2 mmol), 2-bromo-2,2-difluoroacetic acid (7 mg, 0.04 mmol), photocatalyst (4CzIPN, 0.01 M, pre-dissolved in THF, 0.2 mL), NCS (29.4 mg, 0.22 mmol) and THF (2 mL). The crude product was purified by silica gel filtration (eluent: petroleum ether/ ethyl acetate=1/3) to provide the desired compound as a yellow oil (28.3 mg, 67% yield).

$^1\text{H}$  NMR (300 MHz, DMSO)  $\delta$  13.68 (s, 1H), 8.12 (m, 1H), 7.72 (m, 2H), 3.89 (s, 3H).

$^{13}\text{C}$  NMR (75 MHz, DMSO)  $\delta$  166.6, 140.9, 132.9, 129.0, 122.3, 121.7, 119.5, 113.4, 52.9.

HRMS Calcd. For  $\text{C}_9\text{H}_8\text{ClN}_2\text{O}_2$   $[\text{M}+\text{H}]^+$ : 211.0269; found 211.0260.

*6-bromo-3-chloro-1H-indole 2s* The title compound was obtained according to general condition A using the following amounts and conditions: 6-bromo-1H-indole (39.0 mg, 0.2 mmol), 2-bromo-2,2-difluoroacetic acid (7 mg, 0.04 mmol), photocatalyst (4CzIPN, 0.01 M, pre-dissolved in THF, 0.2 mL), NCS (29.4 mg, 0.22 mmol) and THF (2 mL). The crude product was purified by silica gel filtration (eluent: petroleum ether/ ethyl acetate=1/3) to provide the desired compound as a yellow oil (41.9 mg, 91% yield).

$^1\text{H}$  NMR (300 MHz, DMSO)  $\delta$  11.53 (s, 1H), 7.63 (m, 1H), 7.57 (d,  $J = 2.5$  Hz, 1H), 7.44 (d,  $J = 8.5$  Hz, 1H), 7.24 (dd,  $J = 8.5, 1.7$  Hz, 1H).

$^{13}\text{C}$  NMR (75 MHz, DMSO)  $\delta$  136.2, 124.1, 124.0, 123.2, 119.4, 115.5, 115.2, 103.9.

HRMS Calcd. For  $\text{C}_8\text{H}_6\text{BrClN}$   $[\text{M}+\text{H}]^+$ : 229.9367; found 229.9372.

*5-chloro-1H-indole-3-carbonitrile 2u* The title compound was obtained according to general condition A using the following amounts and conditions: 1H-indole-3-carbonitrile (28.4 mg, 0.2 mmol), 2-bromo-2,2-difluoroacetic acid (7 mg, 0.04 mmol), photocatalyst (4CzIPN, 0.01 M, pre-dissolved in THF, 0.2 mL), NCS (29.4 mg, 0.22 mmol) and THF (2 mL). The crude product was purified by silica gel filtration (eluent: petroleum ether/ ethyl acetate=1/3) to provide the desired compound as a yellow oil (11.0 mg, 31% yield).

$^1\text{H}$  NMR (300 MHz, DMSO)  $\delta$  12.41 (s, 1H), 8.35 (s, 1H), 7.71 – 7.64 (m, 1H), 7.59 (d,  $J = 8.7$  Hz, 1H), 7.31 (dd,  $J = 8.7, 2.1$  Hz, 1H).

GC-MS(EI):176 m/z.

The  $^1\text{H}$  NMR shifts are identical to the literature.<sup>8</sup>

*ethyl 5-amino-4-chloro-1H-pyrazole-3-carboxylate 2v* The title compound was obtained according to general condition A using the following amounts and conditions: ethyl 3-amino-1H-pyrazole-5-carboxylate (31.0 mg, 0.2 mmol), 2-bromo-2,2-

difluoroacetic acid (7 mg, 0.04 mmol), photocatalyst (4CzIPN, 0.01 M, pre-dissolved in THF, 0.2 mL), NCS (29.4 mg, 0.22 mmol) and THF (2 mL). The crude product was purified by silica gel filtration (eluent: petroleum ether/ ethyl acetate=1/2) to provide the desired compound as a yellow oil (23.2 mg, 61% yield).

$^1\text{H}$  NMR (300 MHz,  $\text{CDCl}_3$ )  $\delta$  4.43 (q,  $J = 7.1$  Hz, 2H), 4.35 (s, 2H), 1.43 (t,  $J = 7.2$  Hz, 3H).

$^{13}\text{C}$  NMR (75 MHz,  $\text{CDCl}_3$ )  $\delta$  161.2, 148.9, 134.4, 95.9, 61.7, 14.2.

HRMS Calcd. For  $\text{C}_6\text{H}_8\text{ClN}_3\text{O}_2$   $[\text{M}+\text{H}]^+$ : 190.0383; found 190.0379.

*3-(tert-butyl)-4-chloroisoxazol-5-amine 2w* The title compound was obtained according to general condition A using the following amounts and conditions: 3-(tert-butyl)isoxazol-5-amine (28.2 mg, 0.2 mmol), 2-bromo-2,2-difluoroacetic acid (7 mg, 0.04 mmol), photocatalyst (4CzIPN, 0.01 M, pre-dissolved in THF, 0.2 mL), NCS (29.4 mg, 0.22 mmol) and THF (2 mL). The crude product was purified by silica gel filtration (eluent: petroleum ether/ ethyl acetate=1/2) to provide the desired compound as a yellow oil (21.1 mg, 60% yield).

$^1\text{H}$  NMR (300 MHz,  $\text{DMSO}-d_6$ )  $\delta$  5.79 (s, 2H), 1.32 (s, 9H).

$^{13}\text{C}$  NMR (75 MHz,  $\text{DMSO}$ )  $\delta$  171.2, 162.0, 95.6, 33.6, 27.7.

HRMS Calcd. For  $\text{C}_7\text{H}_{11}\text{ClN}_2\text{O}$   $[\text{M}+\text{H}]^+$ : 175.0638; found 175.0643.

*5-chloropyridin-2-amine 2x* The title compound was obtained according to general condition A using the following amounts and conditions: pyridin-2-amine (18.8 mg, 0.2 mmol), 2-bromo-2,2-difluoroacetic acid (7 mg, 0.04 mmol), photocatalyst (4CzIPN, 0.01 M, pre-dissolved in THF, 0.2 mL), NCS (29.4 mg, 0.22 mmol) and THF (2 mL). The crude product was purified by silica gel filtration (eluent: petroleum ether/ ethyl acetate=1/2) to provide the desired compound as a white solid (14.0 mg, 54% yield).

$^1\text{H}$  NMR (300 MHz,  $\text{CDCl}_3$ )  $\delta$  8.01 (dd,  $J = 2.6, 0.7$  Hz, 1H), 7.38 (dd,  $J = 8.7, 2.6$  Hz, 1H), 6.45 (dd,  $J = 8.7, 0.7$  Hz, 1H), 4.51 (s, 2H).

GC-MS(EI): 128 m/z.

The  $^1\text{H}$  NMR shifts are identical to the literature.<sup>8</sup>

*5,6-dichloro-N-methylpyrimidin-4-amine 2y* The title compound was obtained according to general condition A using the following amounts and conditions: 6-chloro-N-methylpyrimidin-4-amine (28.6 mg, 0.2 mmol), 2-bromo-2,2-difluoroacetic acid (7 mg, 0.04 mmol), photocatalyst (4CzIPN, 0.01 M, pre-dissolved in THF, 0.2 mL), NCS (29.4 mg, 0.22 mmol) and THF (2 mL). The crude product was purified by silica gel filtration (eluent: petroleum ether/ ethyl acetate=1/2) to provide the desired compound as a white solid (22.2 mg, 62% yield).

$^1\text{H}$  NMR (300 MHz,  $\text{CDCl}_3$ )  $\delta$  8.32 (s, 1H), 5.61 (s, 1H), 3.12 (d,  $J = 4.9$  Hz, 3H).

$^{13}\text{C}$  NMR (75 MHz,  $\text{CDCl}_3$ )  $\delta$  159.4, 155.1, 155.1, 111.2, 28.5.

HRMS Calcd. For  $\text{C}_5\text{H}_5\text{Cl}_2\text{N}_3$   $[\text{M}+\text{H}]^+$ : 177.9939; found 177.9937.

*2,4,7-trichlorothieno[3,2-d]pyrimidine 2z* The title compound was obtained according to general condition A using the following amounts and conditions: 2,4-

dichlorothieno[3,2-d]pyrimidine (40.8 mg, 0.2 mmol), 2-bromo-2,2-difluoroacetic acid (7 mg, 0.04 mmol), photocatalyst (4CzIPN, 0.01 M, pre-dissolved in THF, 0.2 mL), NCS (29.4 mg, 0.22 mmol) and THF (2 mL). The crude product was purified by silica gel filtration (eluent: petroleum ether/ ethyl acetate=1/6) to provide the desired compound as an off-white solid (25.0 mg, 53% yield).

$^1\text{H}$  NMR (400 MHz,  $\text{CDCl}_3$ )  $\delta$  8.02 (s, 1H).

$^{13}\text{C}$  NMR (101 MHz,  $\text{CDCl}_3$ )  $\delta$  158.6, 157.3, 156.4, 133.0, 128.4, 123.1.

HRMS Calcd. For  $\text{C}_6\text{HCl}_3\text{N}_2\text{S}$   $[\text{M}+\text{H}]^+$ : 238.9004; found 238.9007

*2-amino-3,5-dichlorobenzonitrile 3a* The title compound was obtained according to general condition B using the following amounts and conditions: 2-aminobenzonitrile (23.6 mg, 0.2 mmol), 2-bromo-2,2-difluoroacetic acid (7 mg, 0.04 mmol), photocatalyst (4CzIPN, 0.01 M, pre-dissolved in THF, 0.2 mL), NCS (58.8 mg, 0.44 mmol) and THF (2 mL). The crude product was purified by silica gel filtration (eluent: petroleum ether/ ethyl acetate=1/2) to provide the desired compound as an off-white solid (26.8 mg, 72% yield).

$^1\text{H}$  NMR (300 MHz,  $\text{CDCl}_3$ )  $\delta$  7.46 (d,  $J = 2.3$  Hz, 1H), 7.32 (d,  $J = 2.3$  Hz, 1H), 4.89 (s, 2H).

$^{13}\text{C}$  NMR (101 MHz,  $\text{CDCl}_3$ )  $\delta$  145.0, 133.8, 130.1, 121.9, 120.2, 115.7, 97.6.

HRMS Calcd. For  $\text{C}_7\text{H}_4\text{Cl}_2\text{N}_2$   $[\text{M}+\text{H}]^+$ : 186.9830; found 186.9832.

*4-amino-3,5-dichlorobenzonitrile 3b* The title compound was obtained according to general condition B using the following amounts and conditions: 4-aminobenzonitrile (23.6 mg, 0.2 mmol), 2-bromo-2,2-difluoroacetic acid (7 mg, 0.04 mmol), photocatalyst (4CzIPN, 0.01 M, pre-dissolved in THF, 0.2 mL), NCS (58.8 mg, 0.44 mmol) and THF (2 mL). The crude product was purified by silica gel filtration (eluent: petroleum ether/ ethyl acetate=1/2) to provide the desired compound as a white solid (30.3 mg, 80% yield).

$^1\text{H}$  NMR (300 MHz,  $\text{CDCl}_3$ )  $\delta$  7.49 (s, 2H), 5.03 (s, 2H).

GC-MS(EI):186m/z.

The reported data was identical to the literature.<sup>9</sup>

*4-amino-3,5-dichloro-2-(trifluoromethyl)benzonitrile 3c* The title compound was obtained according to general condition B using the following amounts and conditions: 4-amino-2-(trifluoromethyl)benzonitrile (37.2 mg, 0.2 mmol), 2-bromo-2,2-difluoroacetic acid (7 mg, 0.04 mmol), photocatalyst (4CzIPN, 0.01 M, pre-dissolved in THF, 0.2 mL), NCS (58.8 mg, 0.44 mmol) and THF (2 mL). The crude product was purified by silica gel filtration (eluent: petroleum ether/ ethyl acetate=1/10) to provide the desired compound as a brown solid (39.8 mg, 78% yield).

$^1\text{H}$  NMR (300 MHz,  $\text{CDCl}_3$ )  $\delta$  7.66 (s, 1H), 5.36 (s, 2H).

$^{13}\text{C}$  NMR (75 MHz,  $\text{CDCl}_3$ )  $\delta$  145.3, 133.5, 129.4 ( $^2J_{\text{C-F}}=30.3\text{Hz}$ ), 127.0, 121.5 ( $^1J_{\text{C-F}}=274.5$  Hz), 121.4, 115.5, 98.8.

HRMS Calcd. For  $\text{C}_8\text{H}_3\text{Cl}_2\text{F}_3\text{N}_2$   $[\text{M}+\text{H}]^+$ : 254.9704; found 254.9711.

*5-chloro-N-(2,4-dichlorophenyl)pyrimidin-2-amine* **3q** The title compound was obtained according to general condition B using the following amounts and conditions: N-phenylpyrimidin-2-amine (34.2 mg, 0.2 mmol), 2-bromo-2,2-difluoroacetic acid (7 mg, 0.04 mmol), photocatalyst (4CzIPN, 0.01 M, pre-dissolved in THF, 0.2 mL), NCS (88.2 mg, 0.66 mmol) and THF (2 mL). The crude product was purified by silica gel filtration (eluent: petroleum ether/ ethyl acetate=1/10) to provide the desired compound as a white solid (44 mg, 81% yield).

<sup>1</sup>H NMR (300 MHz, CDCl<sub>3</sub>) δ 8.45 (d, *J* = 9.0 Hz, 1H), 8.42 (s, 2H), 7.63 (s, 1H), 7.42 (d, *J* = 2.5 Hz, 1H), 7.28 (dd, *J* = 9.0, 2.4 Hz, 1H).

<sup>13</sup>C NMR (75 MHz, CDCl<sub>3</sub>) δ 157.5, 156.3, 134.5, 128.8, 127.6, 127.4, 123.1, 122.1, 120.9.

HRMS Calcd. For C<sub>10</sub>H<sub>6</sub>Cl<sub>3</sub>N<sub>3</sub> [M+H]<sup>+</sup>: 273.9706; found 273.9722.

*tert-butyl(2-chloro-5-((4-cyano-1-methyl-1H-pyrazol-5-yl)amino)-4-methylphenyl)carbamate* **4a** The title compound was obtained according to general condition A using the following amounts and conditions: tert-butyl (3-((4-cyano-1-methyl-1H-pyrazol-5-yl)amino)-4-methylphenyl)carbamate (65.4 mg, 0.2 mmol), 2-bromo-2,2-difluoroacetic acid (7 mg, 0.04 mmol), photocatalyst (4CzIPN, 0.01 M, pre-dissolved in THF, 0.2 mL), NCS (29.4 mg, 0.22 mmol) and THF (2 mL). The crude product was purified by silica gel filtration (eluent: petroleum ether/ ethyl acetate=1/2) to provide the desired compound as a yellow solid (53.2 mg, 73% yield).

<sup>1</sup>H NMR (300 MHz, CDCl<sub>3</sub>) δ 7.66 (s, 1H), 7.45 (s, 1H), 7.30 (s, 1H), 6.86 (s, 1H), 6.15 (s, 1H), 3.65 (s, 3H), 2.19 (s, 3H), 1.48 (s, 9H).

<sup>13</sup>C NMR (75 MHz, CDCl<sub>3</sub>) δ 152.3, 146.3, 141.1, 139.4, 134.9, 133.9, 123.9, 113.5, 110.4, 106.2, 82.9, 81.2, 36.3, 28.3, 17.0.

HRMS Calcd. For C<sub>17</sub>H<sub>20</sub>ClN<sub>5</sub>O<sub>2</sub> [M+H]<sup>+</sup>: 362.1384; found 362.1276.

*2,6-dichloro-4-((6,7-dimethoxyquinazolin-4-yl)oxy)aniline* **4b** The title compound was obtained according to general condition A using the following amounts and conditions: 2-chloro-4-((6,7-dimethoxyquinazolin-4-yl)oxy)aniline (66.2 mg, 0.2 mmol), 2-bromo-2,2-difluoroacetic acid (7 mg, 0.04 mmol), photocatalyst (4CzIPN, 0.01 M, pre-dissolved in THF, 0.2 mL), NCS (29.4 mg, 0.22 mmol) and THF (2 mL). The crude product was purified by silica gel filtration (eluent: petroleum ether/ ethyl acetate=1/2) to provide the desired compound as a yellow solid (46.2 mg, 63% yield).

<sup>1</sup>H NMR (300 MHz, DMSO-d<sub>6</sub>) δ 8.58 (s, 1H), 7.51 (s, 1H), 7.37 (s, 3H), 5.55 (s, 2H), 4.01 (s, 3H), 3.99 (s, 3H).

<sup>13</sup>C NMR (75 MHz, DMSO-d<sub>6</sub>) δ 165.3, 156.1, 152.5, 150.4, 149.2, 141.8, 139.8, 122.7, 118.1, 109.9, 107.0, 101.0, 56.5, 56.4.

HRMS Calcd. For C<sub>16</sub>H<sub>13</sub>Cl<sub>2</sub>N<sub>3</sub>O<sub>3</sub> [M+H]<sup>+</sup>: 366.0412; found 366.0413.

*tert-butyl (2-((5-bromopyrimidin-2-yl)amino)-5-chloro-3-methylphenyl)carbamate* **4c** The title compound was obtained according to general condition A using the following amounts and conditions: tert-butyl (2-((5-bromopyrimidin-2-yl)amino)-3-methylphenyl)carbamate (75.6 mg, 0.2 mmol), 2-bromo-2,2-difluoroacetic acid (7 mg,

0.04 mmol), photocatalyst (4CzIPN, 0.01 M, pre-dissolved in THF, 0.2 mL), NCS (29.4 mg, 0.22 mmol) and THF (2 mL). The crude product was purified by silica gel filtration (eluent: petroleum ether/ ethyl acetate=1/2) to provide the desired compound as a white solid (59.0 mg, 71% yield).

<sup>1</sup>H NMR (300 MHz, CDCl<sub>3</sub>) δ 8.39 (s, 2H), 7.78 (d, *J* = 8.9 Hz, 1H), 7.34 (d, *J* = 8.9 Hz, 1H), 6.86 (d, *J* = 8.5 Hz, 2H), 2.24 (s, 3H), 1.50 (s, 9H).

<sup>13</sup>C NMR (75 MHz, CDCl<sub>3</sub>) δ 159.8, 159.0, 152.9, 135.0, 134.7, 129.4, 128.7, 127.6, 119.3, 109.0, 81.1, 28.3, 16.0.

HRMS Calcd. For C<sub>16</sub>H<sub>18</sub>BrClN<sub>4</sub>O<sub>2</sub> [M+H]<sup>+</sup>: 413.0380; found 413.0374.

*2-(5-chloro-2-((2,6-dichlorophenyl)amino)phenyl)acetic acid 4d* The title compound was obtained according to general condition A using the following amounts and conditions: 2-(2-((2,6-dichlorophenyl)amino)phenyl)acetic acid (59.0 mg, 0.2 mmol), 2-bromo-2,2-difluoroacetic acid (7 mg, 0.04 mmol), photocatalyst (4CzIPN, 0.01 M, pre-dissolved in THF, 0.2 mL), NCS (29.4 mg, 0.22 mmol) and THF (2 mL). The crude product was purified by silica gel filtration (eluent: petroleum ether/ ethyl acetate=1/2) to provide the desired compound as a white solid (50.0 mg, 76% yield).

<sup>1</sup>H NMR (300 MHz, Methanol-d<sub>4</sub>) δ 7.44 (d, *J* = 8.1 Hz, 2H), 7.27 (d, *J* = 2.5 Hz, 1H), 7.15 – 7.05 (m, 2H), 6.40 (d, *J* = 8.6 Hz, 1H), 3.77 (s, 2H).

GC-MS(EI):329 m/z.

The <sup>1</sup>H NMR shifts are identical to the literature.<sup>10</sup>

*N-(2-chloro-4-ethoxyphenyl)acetamide 4e* The title compound was obtained according to general condition A using the following amounts and conditions: N-(4-ethoxyphenyl)acetamide (35.8 mg, 0.2 mmol), 2-bromo-2,2-difluoroacetic acid (7 mg, 0.04 mmol), photocatalyst (4CzIPN, 0.01 M, pre-dissolved in THF, 0.2 mL), NCS (29.4 mg, 0.22 mmol) and CH<sub>3</sub>CN (2 mL). The crude product was purified by silica gel filtration (eluent: petroleum ether/ ethyl acetate=1/2) to provide the desired compound as a white solid (27.2 mg, 63% yield).

<sup>1</sup>H NMR (300 MHz, CDCl<sub>3</sub>) δ 7.53 (d, *J* = 2.6 Hz, 1H), 7.35 (dd, *J* = 8.8, 2.6 Hz, 1H), 6.86 (d, *J* = 8.9 Hz, 1H), 4.08 (q, *J* = 7.0 Hz, 2H), 2.16 (s, 3H), 1.46 (t, *J* = 7.0 Hz, 3H).

<sup>13</sup>C NMR (75 MHz, CDCl<sub>3</sub>) δ 168.6, 151.3, 131.4, 122.9, 122.6, 119.8, 113.7, 65.1, 24.3, 14.7.

HRMS Calcd. For C<sub>10</sub>H<sub>12</sub>ClNO<sub>2</sub> [M+H]<sup>+</sup>: 214.0635; found 214.0633.

*N-(2,5-dichloro-4-ethoxyphenyl)acetamide 4e'* The title compound was obtained according to general condition B using the following amounts and conditions: N-(4-ethoxyphenyl)acetamide (35.8 mg, 0.2 mmol), 2-bromo-2,2-difluoroacetic acid (7 mg, 0.04 mmol), photocatalyst (4CzIPN, 0.01 M, pre-dissolved in THF, 0.2 mL), NCS (58.8 mg, 0.44 mmol) and CH<sub>3</sub>CN (2 mL). The crude product was purified by silica gel filtration (eluent: petroleum ether/ ethyl acetate=1/2) to provide the desired compound as a white solid (38.2 mg, 77% yield).

<sup>1</sup>H NMR (300 MHz, CDCl<sub>3</sub>) δ 8.36 (s, 1H), 7.42 (s, 1H), 6.93 (s, 1H), 4.07 (q, *J* = 7.0 Hz, 2H), 2.23 (s, 3H), 1.48 (t, *J* = 7.0 Hz, 3H).

$^{13}\text{C}$  NMR (75 MHz,  $\text{CDCl}_3$ )  $\delta$  168.2, 151.1, 128.1, 123.7, 122.0, 121.7, 113.7, 65.4, 24.6, 14.6.

HRMS Calcd. For  $\text{C}_{10}\text{H}_{11}\text{Cl}_2\text{NO}_2$   $[\text{M}+\text{H}]^+$ : 248.0245; found 248.0253.

*2-(diethylamino)ethyl 4-amino-3,5-dichlorobenzoate* **4f** The title compound was obtained according to general condition B using the following amounts and conditions: 2-(diethylamino)ethyl 4-aminobenzoate (47.2 mg, 0.2 mmol), 2-bromo-2,2-difluoroacetic acid (7 mg, 0.04 mmol), photocatalyst (4CzIPN, 0.01 M, pre-dissolved in THF, 0.2 mL), NCS (58.8 mg, 0.44 mmol) and  $\text{CH}_3\text{CN}$  (2 mL). The crude product was purified by silica gel filtration (eluent: petroleum ether/ ethyl acetate=1/2) to provide the desired compound as a brown solid (44.5 mg, 73% yield).

$^1\text{H}$  NMR (300 MHz,  $\text{CDCl}_3$ )  $\delta$  7.87 (s, 2H), 4.91 (s, 3H), 4.35 (t,  $J = 6.3$  Hz, 2H), 2.83 (t,  $J = 6.3$  Hz, 2H), 2.62 (q,  $J = 7.2$  Hz, 4H), 1.07 (t,  $J = 7.1$  Hz, 6H).

$^{13}\text{C}$  NMR (75 MHz,  $\text{CDCl}_3$ )  $\delta$  178.1, 133.4, 129.5, 118.5, 107.4, 50.6, 47.4, 29.6, 11.2.  
HRMS Calcd. For  $\text{C}_{13}\text{H}_{18}\text{Cl}_2\text{N}_2\text{O}_2$   $[\text{M}+\text{H}]^+$ : 305.0824; found 305.0809.

*5-(4-(2-((5-chloropyridin-2-yl)(methyl)amino)ethoxy)benzyl)thiazolidine-2,4-dione* **4g**

The title compound was obtained according to general condition A using the following amounts and conditions: 5-(4-(2-(methyl(pyridin-2-yl)amino)ethoxy)benzyl)thiazolidine-2,4-dione (71.4 mg, 0.2 mmol), 2-bromo-2,2-difluoroacetic acid (7 mg, 0.04 mmol), photocatalyst (4CzIPN, 0.01 M, pre-dissolved in THF, 0.2 mL), NCS (29.4 mg, 0.22 mmol) and  $\text{CH}_3\text{CN}$  (2 mL). The crude product was purified by silica gel filtration (eluent: petroleum ether/ ethyl acetate=1/2) to provide the desired compound as a white solid (54.9 mg, 70% yield).

$^1\text{H}$  NMR (300 MHz, DMSO)  $\delta$  8.13 (d,  $J = 2.6$  Hz, 1H), 7.64 (dd,  $J = 9.1, 2.6$  Hz, 1H), 7.13 (d,  $J = 8.4$  Hz, 2H), 6.86 (d,  $J = 8.5$  Hz, 2H), 6.66 (d,  $J = 9.1$  Hz, 1H), 4.84 (dd,  $J = 9.0, 4.3$  Hz, 1H), 4.09 (t,  $J = 5.8$  Hz, 2H), 3.86 (t,  $J = 5.8$  Hz, 2H), 3.33 – 3.22 (m, 2H), 3.05 (s, 3H).

$^{13}\text{C}$  NMR (75 MHz, DMSO)  $\delta$  176.5, 172.4, 158.5, 157.9, 148.0, 137.8, 130.8, 129.2, 114.7, 112.0, 106.2, 65.8, 53.6, 49.0, 37.5, 36.8.

HRMS Calcd. For  $\text{C}_{18}\text{H}_{18}\text{ClN}_3\text{O}_3\text{S}$   $[\text{M}+\text{H}]^+$ : 392.0836; found 392.0846

*N-(2-chloro-4-methyl-5-((4-(pyridin-3-yl)pyrimidin-2-yl)amino)phenyl)-4-((4-methylpiperazin-1-yl)methyl)benzamide* **4h** The title compound was obtained according to general condition A using the following amounts and conditions: N-(4-methyl-3-((4-(pyridin-3-yl)pyrimidin-2-yl)amino)phenyl)-4-((4-methylpiperazin-1-yl)methyl)benzamide (98.6 mg, 0.2 mmol), 2-bromo-2,2-difluoroacetic acid (7 mg, 0.04 mmol), photocatalyst (4CzIPN, 0.01 M, pre-dissolved in THF, 0.2 mL), NCS (29.4 mg, 0.22 mmol) and water (2 mL). The crude product was purified by silica gel filtration (eluent: petroleum ether/ ethyl acetate=1/2) to provide the desired compound as a yellow solid (51.7 mg, 49% yield)

$^1\text{H}$  NMR (300 MHz,  $\text{CDCl}_3$ )  $\delta$  9.37 (s, 1H), 9.23 (d,  $J = 2.3$  Hz, 1H), 8.75 – 8.61 (m, 2H), 8.52 (d,  $J = 5.2$  Hz, 1H), 8.42 (s, 1H), 7.89 (d,  $J = 8.1$  Hz, 2H), 7.48 (d,  $J = 8.0$

Hz, 2H), 7.42 (dd,  $J = 8.0, 4.8$  Hz, 1H), 7.25 (s, 1H), 7.23 – 7.17 (m, 2H), 3.59 (s, 2H), 2.53 (s, 8H), 2.33 (s, 3H), 2.32 (s, 3H).

$^{13}\text{C}$  NMR (75 MHz,  $\text{CDCl}_3$ )  $\delta$  164.9, 162.8, 160.5, 159.2, 151.4, 148.5, 142.8, 136.9, 135.4, 133.6, 132.9, 132.7, 130.1, 129.5, 127.1, 125.5, 123.9, 117.2, 114.5, 108.5, 62.4, 55.0, 52.9, 45.8, 17.7.

HRMS Calcd. For  $\text{C}_{29}\text{H}_{30}\text{ClN}_7\text{O}$   $[\text{M}+\text{H}]^+$ : 528.2279; found 528.2293

#### Procedure for Radical capture experiments

A 10 mL quartz tube was charged with 2-aminobenzonitrile (0.2 mmol), 2-bromo-2,2-difluoroacetic acid (0.04 mmol), photocatalyst (4CzIPN, 0.01 M, pre-dissolved in THF, 0.2 mL) and THF (1 mL) in sequence. The tube was sealed with a rubber septum and protected with Nitrogen via bubbling using a syringe. After that NCS (0.22 mmol, 1.1 equivalents, pre-dissolved in THF) and BHT (0.4 mmol) were added. The mixture was then stirred with a Teflon® stir bar under the irradiation of Blue LEDs (10W, equipped with a thermotank). After 30 mins, the mixture was diluted with ethyl acetate (3 mL) and washed with saturated  $\text{NaHCO}_3$  aqueous solution (5 mL). The organic layer was concentrated and monitored by LC-MS.

#### Procedure for On-Off experiment

A 10 mL quartz tube was charged with 2-aminobenzonitrile (0.2 mmol), 2-bromo-2,2-difluoroacetic acid (0.04 mmol), photocatalyst (4CzIPN, 0.01 M, pre-dissolved in THF, 0.2 mL) and THF (1 mL) in sequence. The tube was sealed with a rubber septum and protected with Nitrogen via bubbling using a syringe. After that NCS (0.22 mmol, 1.1 equivalents, pre-dissolved in THF) was added. The mixture was then stirred with a Teflon® stir bar under the irradiation of Blue LEDs (10W, equipped with a thermotank) for 10 minutes. The light was then removed for 10 minutes. After that, light was conducted or not with 10 minutes intervals. The reaction was tracked with LC-MS at each 10 minutes.

#### Procedure for chlorination of 2-amino-5-chlorobenzonitrile

A 10 mL quartz tube was charged with 2-amino-5-chlorobenzonitrile (0.2 mmol), 2-bromo-2,2-difluoroacetic acid (0.04 mmol), photocatalyst (4CzIPN, 0.01 M, pre-dissolved in THF, 0.2 mL) and THF (1 mL) in sequence. The tube was sealed with a rubber septum and protected with Nitrogen via bubbling using a syringe. After that NCS (0.22 mmol, 1.1 equivalents, pre-dissolved in THF) was added. The mixture was then stirred with a Teflon® stir bar under the irradiation of Blue LEDs (10W, equipped with a thermotank). Upon completion of the reaction, the mixture was diluted with ethyl acetate (3 mL) and washed with saturated  $\text{NaHCO}_3$  aqueous solution (5 mL). The organic layer was concentrated and purified via a flash column (PE/EA from 10/1 to 3/1). Product **3a** was isolated in the yield of 15%. Using same reaction procedure without adding bromo-2,2-difluoroacetic acid, the yield was 80%.

#### Procedures for synthesis of product **6b**



A 10 mL quartz tube was charged with 2-aminobenzonitrile (0.2 mmol), 2-bromo-2,2-difluoroacetic acid (0.04 mmol), photocatalyst (4CzIPN, 0.01 M, pre-dissolved in THF, 0.2 mL) and THF (1 mL) in sequence. The tube was seal with a rubber septum and protected with Nitrogen via bubbling using a springe. After that NCS (0.22 mmol, 1.1 equivalents, pre-dissolved in THF) were added. The mixture was then stirred with a Teflon® stir bar under the irritation of Blue LEDs (10W, equipped with a thermotank). After 30 mins, the mixture was diluted with ethyl acetate (3 mL) and washed with saturated NaHCO<sub>3</sub> aqueous solution (5 mL). The organic extracts were concentrated and used without purification.

Another 10 mL reaction flask was charged with amine and DMF dimethyl acetal (0.4 mmol) in methanol (3 mL). The reaction mixture was stirred at 70 °C until completion as indicated by TLC. The mixture was concentrated and purified by column separation (CH<sub>2</sub>Cl<sub>2</sub>/MeOH = 20/1, v/v), to obtain the product **5a** Yellow oil (37 mg, 89% yield). A mixture of (E)-N'-(4-chloro-2-cyanophenyl)-N,N-dimethylformimidamide (25 mg, 0.37 mmol), aniline (11.2 mg) and acetic acid (0.5 mL) was stirred at 100 °C for 2 h. The reaction mixture was poured into ice water and extracted with ethyl acetate. The organic layer was concentrated and the residue was rinsed in a silica column with eluent (petroleum ether: ethyl acetate = 5: 1). Fractions were combined and dried under vacuum to afford the title compound as an off white solid (27.5 mg, 89% yield).

A 10 mL quartz tube was charged with 6-chloro-N-phenylquinazolin-4-amine **6a** (25.6 mg, 0.1 mmol), 2-bromo-2,2-difluoroacetic acid (0.02 mmol), photocatalyst (4CzIPN, 0.01 M, pre-dissolved in THF, 0.1 mL) and THF (1 mL) in sequence. The tube was seal with a rubber septum and protected with Nitrogen via bubbling using a springe. After that NCS (0.11 mmol, 1.1 equivalents, pre-dissolved in THF) were added. The mixture was then stirred with a Teflon® stir bar under the irritation of Blue LEDs (10W, equipped with a thermotank). After 30 mins, the mixture was diluted with ethyl acetate (3 mL) and washed with saturated NaHCO<sub>3</sub> aqueous solution (5 mL). The organic extracts were concentrated and purified via a flash column (PE/EA from 10/1 to 3/1) to yield product **6b** as a white solid (17.7 mg, 61% yield)

(E)-N'-(4-chloro-2-cyanophenyl)-N,N-dimethylformimidamide **5a**.

<sup>1</sup>H NMR (300 MHz, CDCl<sub>3</sub>) δ 7.59 (s, 1H), 7.47 (d, *J* = 2.5 Hz, 1H), 7.35 (dd, *J* = 8.7, 2.5 Hz, 1H), 6.89 (d, *J* = 8.7 Hz, 1H), 3.09 (d, *J* = 1.1 Hz, 6H).

<sup>13</sup>C NMR (75 MHz, CDCl<sub>3</sub>) δ 153.9, 153.8, 133.6, 132.3, 126.7, 120.9, 117.5, 107.8, 40.4, 34.7.

HRMS Calcd. For C<sub>10</sub>H<sub>10</sub>ClN<sub>3</sub> [M+H]<sup>+</sup>: 208.0641; found 208.0639.

6-chloro-N-phenylquinazolin-4-amine **6a**

<sup>1</sup>H NMR (300 MHz, CDCl<sub>3</sub>) δ 8.75 (s, 1H), 7.96 (d, *J* = 2.1 Hz, 1H), 7.89 (d, *J* = 8.9 Hz, 1H), 7.74 (ddd, *J* = 8.4, 3.2, 1.6 Hz, 3H), 7.50 – 7.37 (m, 2H), 7.28 – 7.16 (m, 1H).

<sup>13</sup>C NMR (75 MHz, CDCl<sub>3</sub>) δ 156.8, 155.1, 148.4, 137.7, 133.8, 132.2, 130.6, 129.2, 125.1, 122.1, 119.9, 115.8.

HRMS Calcd. For C<sub>14</sub>H<sub>10</sub>ClN<sub>3</sub> [M+H]<sup>+</sup>: 256.0641; found 256.0640.

## 6-chloro-N-(4-chlorophenyl)quinazolin-4-amine **6b**

The title compound was obtained according to general condition A as a white solid (35 mg, 61% yield).

$^1\text{H}$  NMR (300 MHz, DMSO- $d_6$ )  $\delta$  9.86 (s, 1H), 8.74 (d,  $J$  = 2.2 Hz, 1H), 8.61 (s, 1H), 7.94 – 7.69 (m, 4H), 7.45 – 7.34 (m, 2H), 7.21 – 6.98 (m, 1H).

$^{13}\text{C}$  NMR (75 MHz, DMSO)  $\delta$  157.5, 155.4, 148.8, 139.3, 133.8, 130.9, 130.5, 129.0, 124.4, 122.9, 122.8, 116.5.

HRMS Calcd. For  $\text{C}_{14}\text{H}_9\text{Cl}_2\text{N}_3$   $[\text{M}+\text{H}]^+$ : 290.0252; found 290.0251.

## 5. Gram-scale synthesis

A 50 mL quartz tube was charged with N-phenylacetamide (1.36g, 10 mmol), 2-bromo-2,2-difluoroacetic acid (69.6 mg, 0.4 mmol), photocatalyst (4CzIPN, 0.01 M, pre-dissolved in THF, 2 mL) and THF (20 mL) in sequence. The tube was seal with a rubber septum and protected with Nitrogen via bubbling using a springe. After that NCS (1.46 g, 11 mmol, 1.1 equivalents, pre-dissolved in 5 mL THF) was added. The mixture was then stirred with a Teflon® stir bar under the irritation of Blue LEDs (10W, equipped with a thermotank). Upon completion of the reaction, the solvent (THF) was vaped and recycled. The residue was diluted with ethyl acetate (10 mLx2) and washed with saturated  $\text{NaHCO}_3$  aqueous solution (10 mLx2). The organic layer was concentrated and purified via recrystallization (Methanol/Water=1/3) to yield product (1.27g, 75%).

## 6. Stern Volmer Fluorescence Quenching

For the quenching of 4CzIPN with anilines or NCS, the emission of a 0.2 mM solution of 4CzIPN in THF excited at 455 nm ( $I_0$  for 4CzIPN solution and  $I$  for solutions with anilines or NCS) was measured with varying concentrations at  $20\pm 0.5$  °C.<sup>11</sup> The ratio of  $I_0/I$  linearly increased along with the concentration of anilines, but remained almost constant at different NCS concentrations. Thus, the results showed emissions was quenched from anilines rather than NCS. The results were shown below:

Fluorescence Quenching with 2-aminobenzonitrile, 2-amino-5-chlorobenzonitrile and acid catalyst (equal equivalents with aniline)

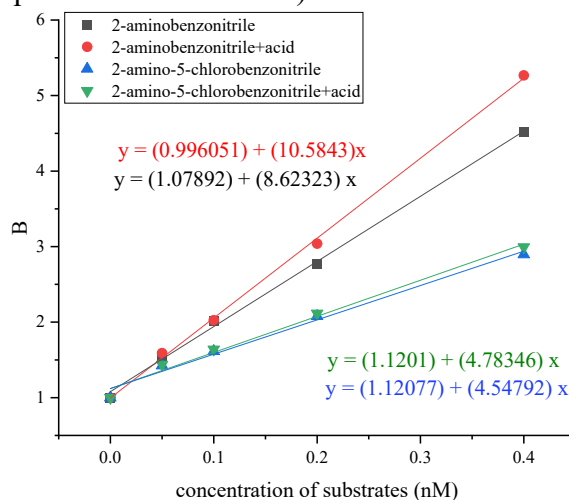

## Fluorescence Quenching with o-toluidine.

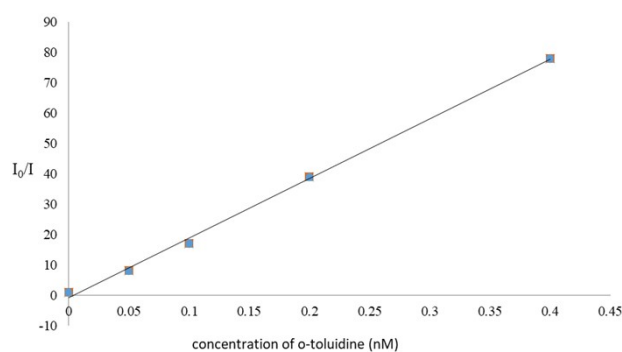

## Fluorescence Quenching with NCS

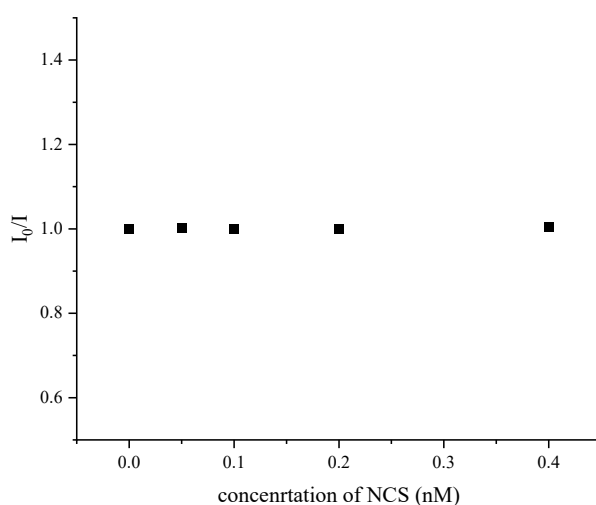

## 7. Other examples examined

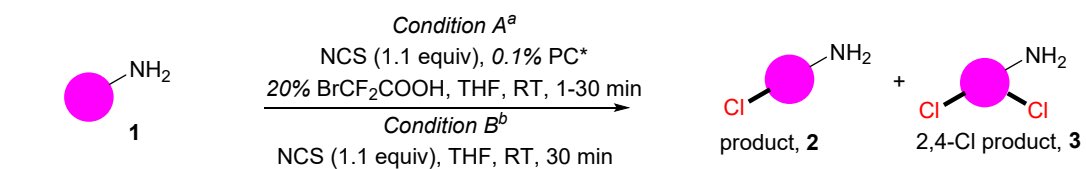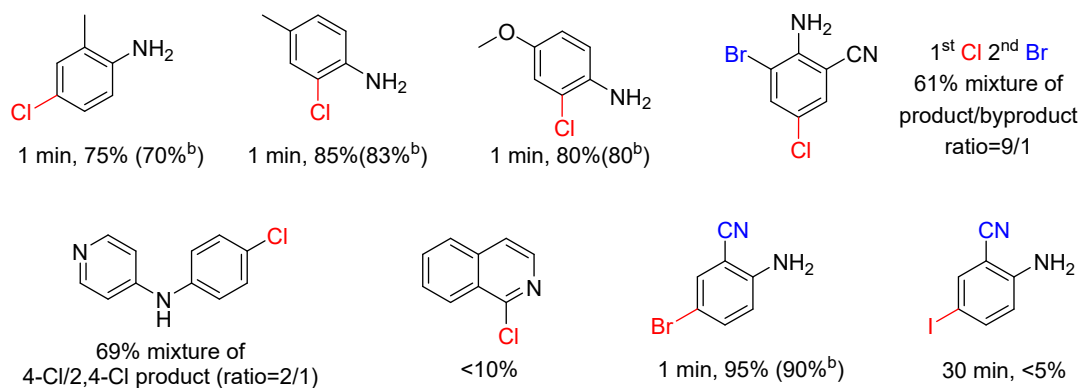

Copies of NMR spectra  
<sup>1</sup>H NMR of 2a

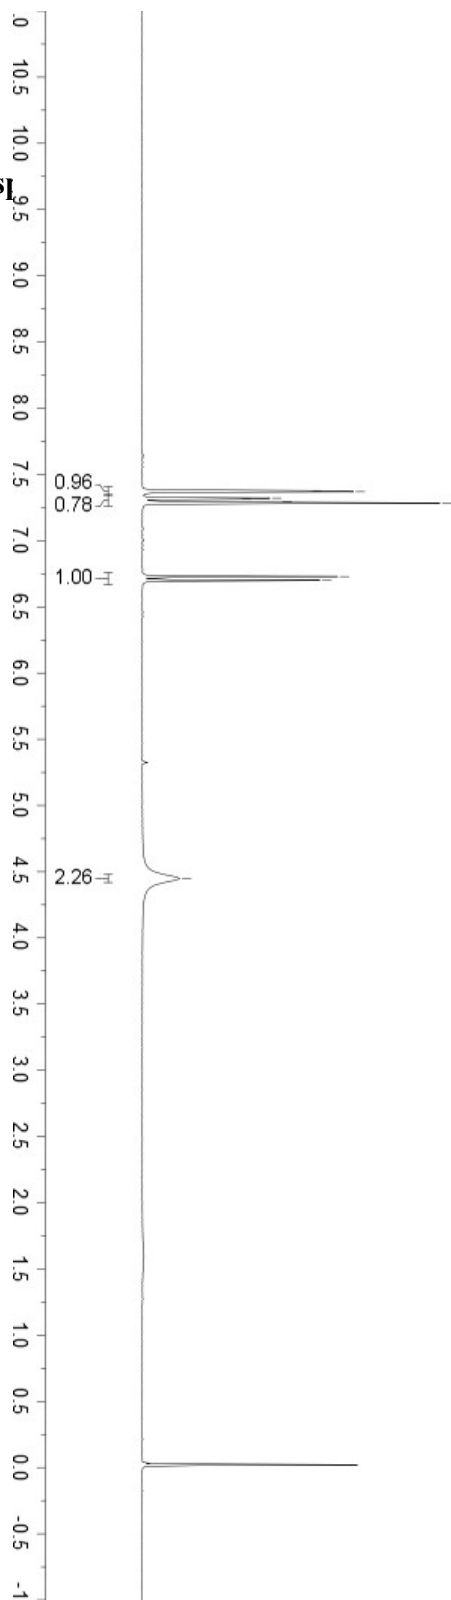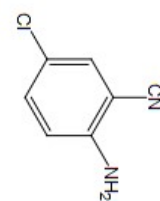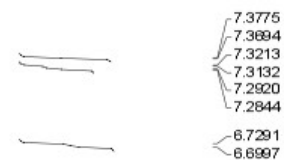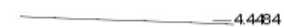

<sup>1</sup>H NMR of 2b

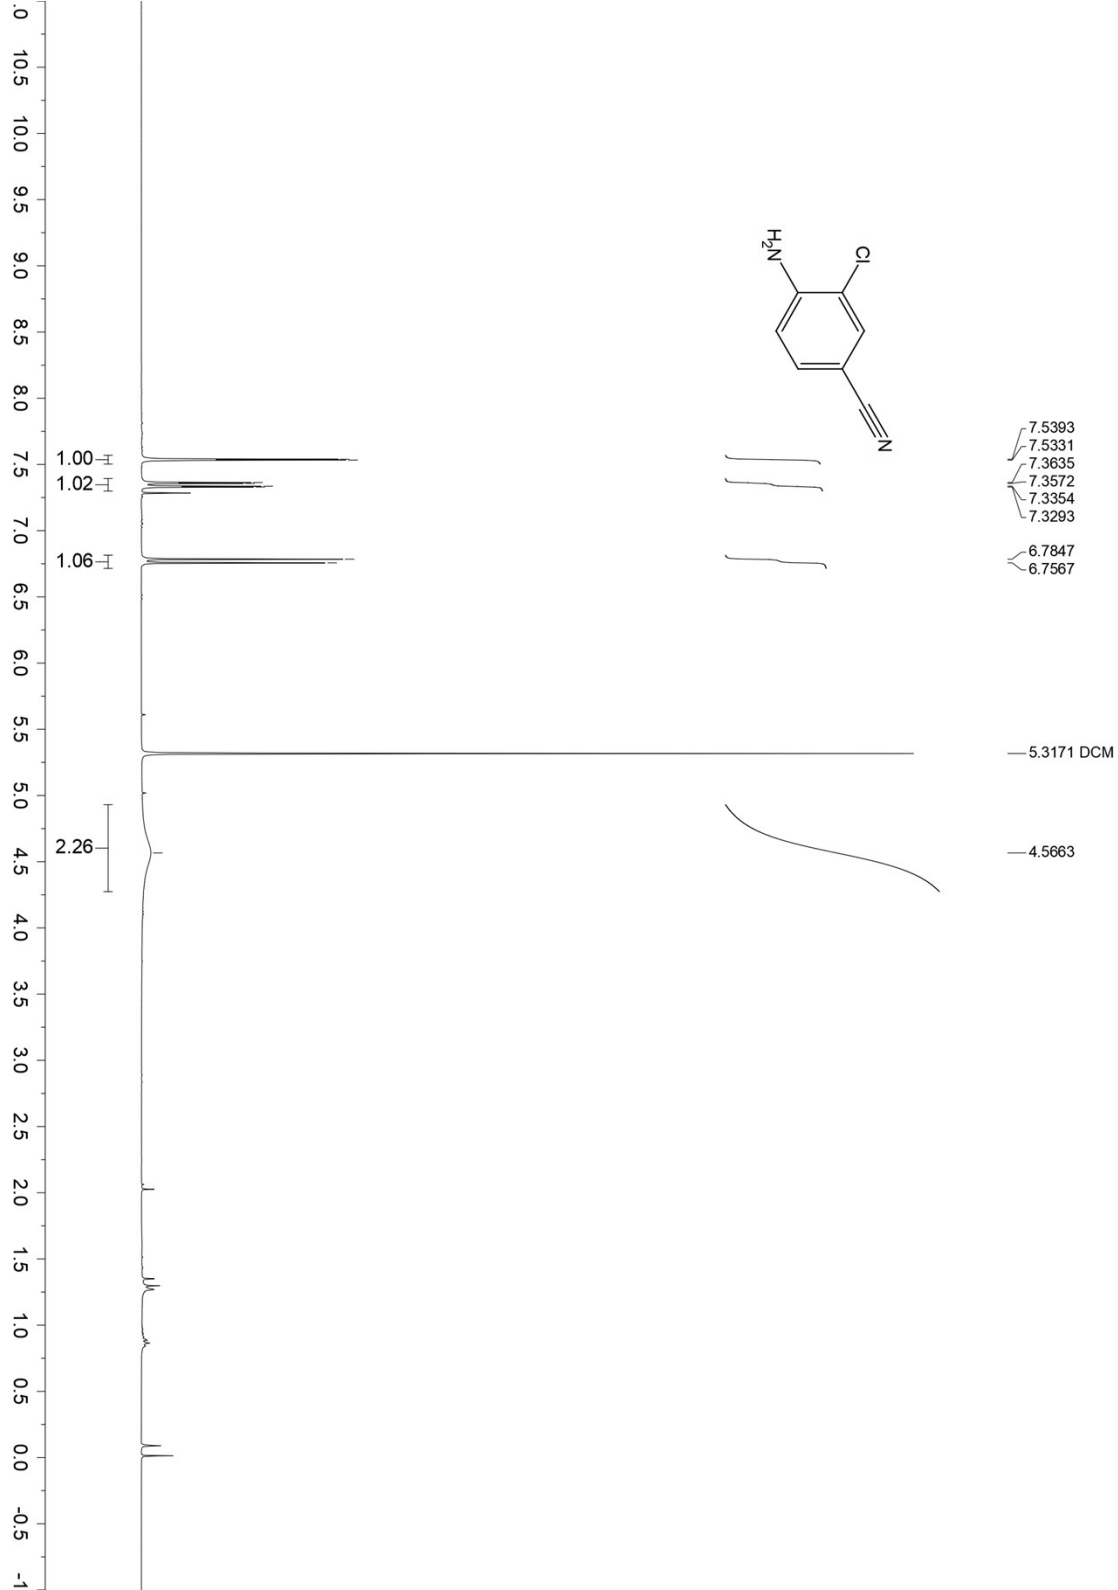

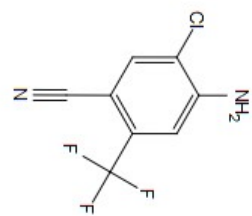

<sup>1</sup>H NMR of 2c

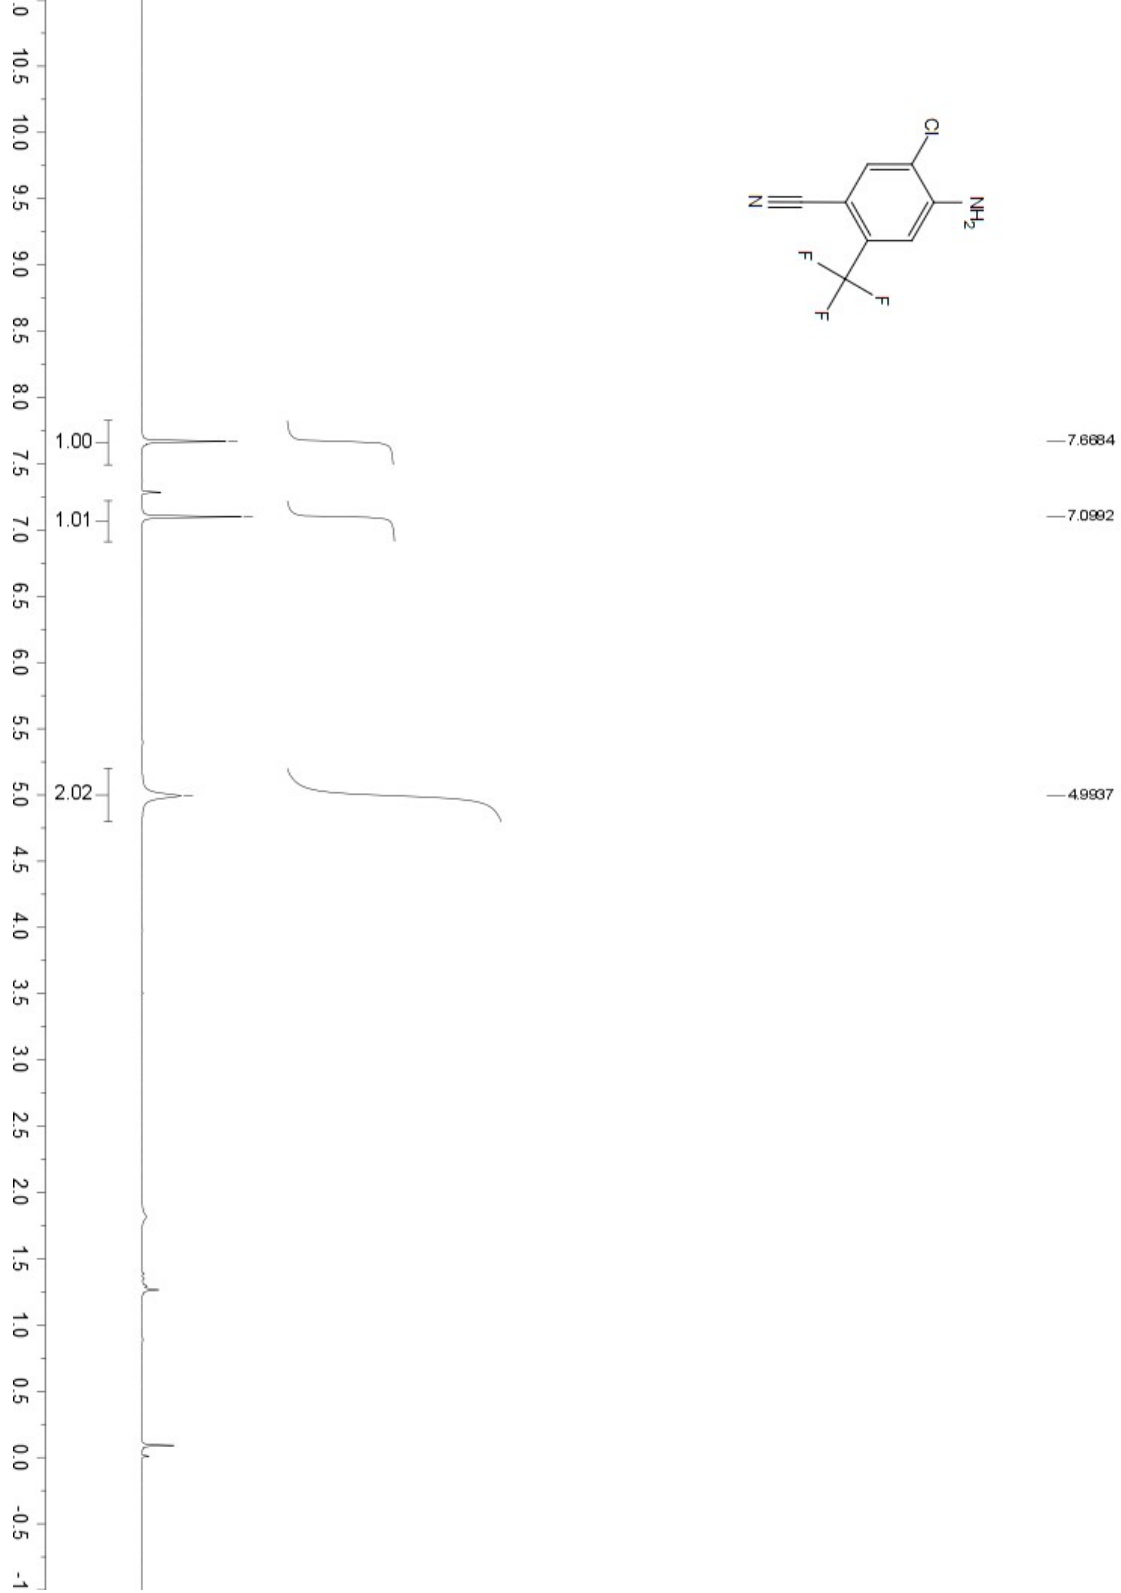

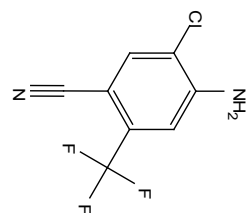

<sup>13</sup>C NMR of 2c

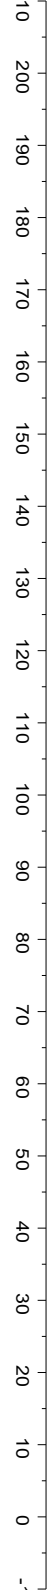

- 147.06
- 135.46
- 133.36
- 132.92
- 132.49
- 132.05
- 127.59
- 123.96
- 120.56
- 120.33
- 116.70
- 115.72
- 112.75
- 112.68
- 112.62
- 112.55
- 97.31
- 97.29
- 97.26
- 97.24

<sup>1</sup>H NMR of 2d

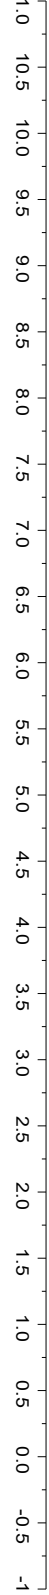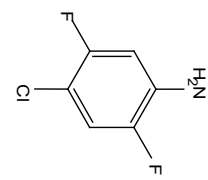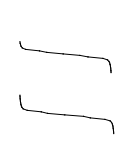

- 7.0686
- 7.0469
- 7.0347
- 7.0127
- 6.6096
- 6.5839
- 6.5766
- 6.5505

3.8477



$^{13}\text{C}$  NMR of 2d

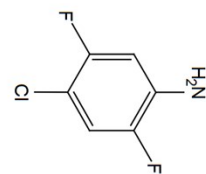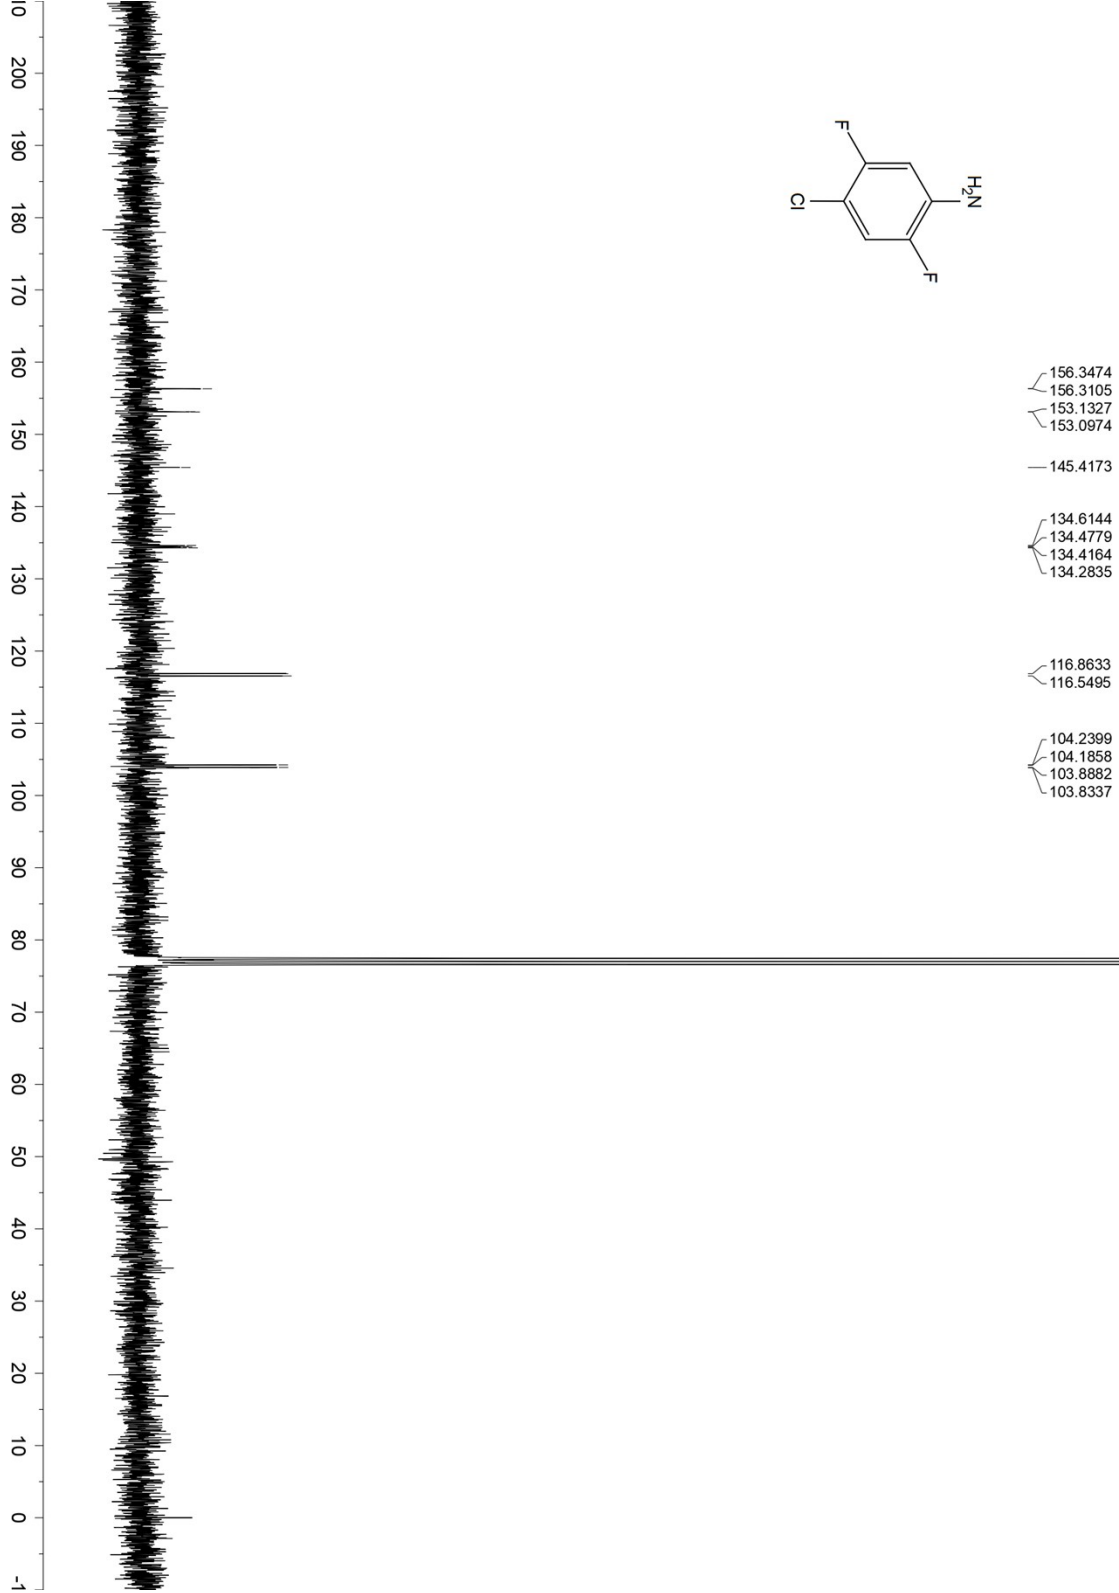

<sup>1</sup>H NMR of 2e

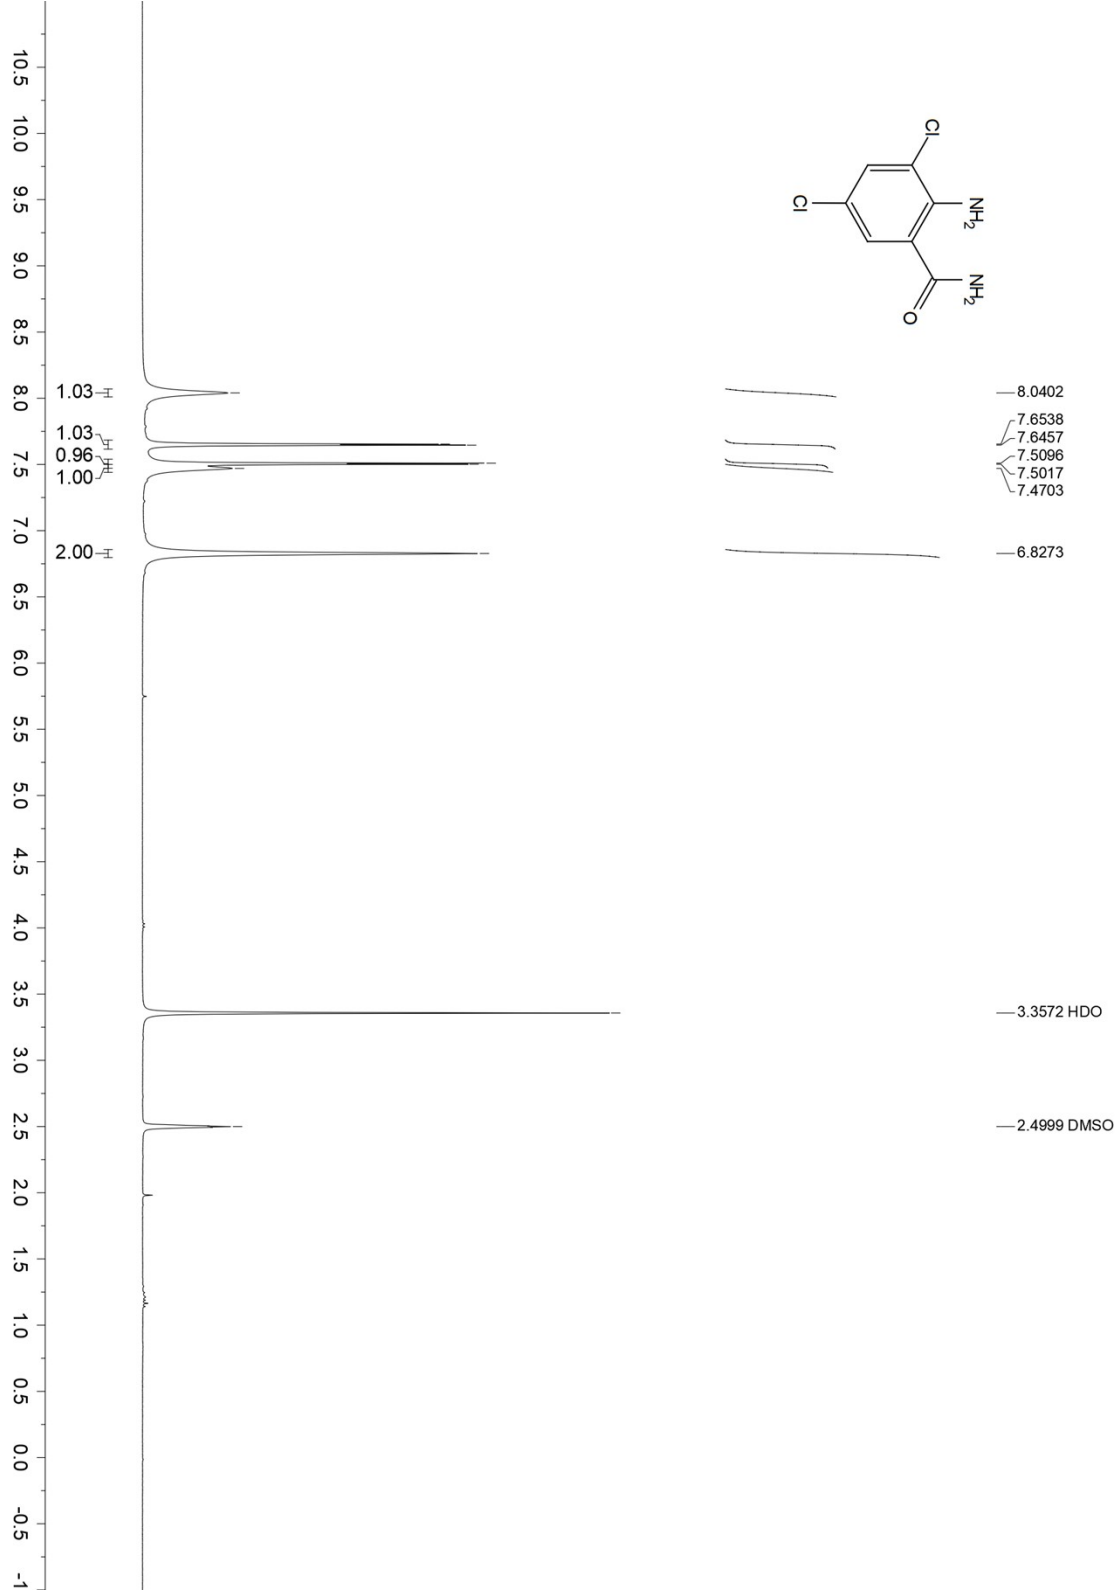

<sup>13</sup>C NMR of 2e

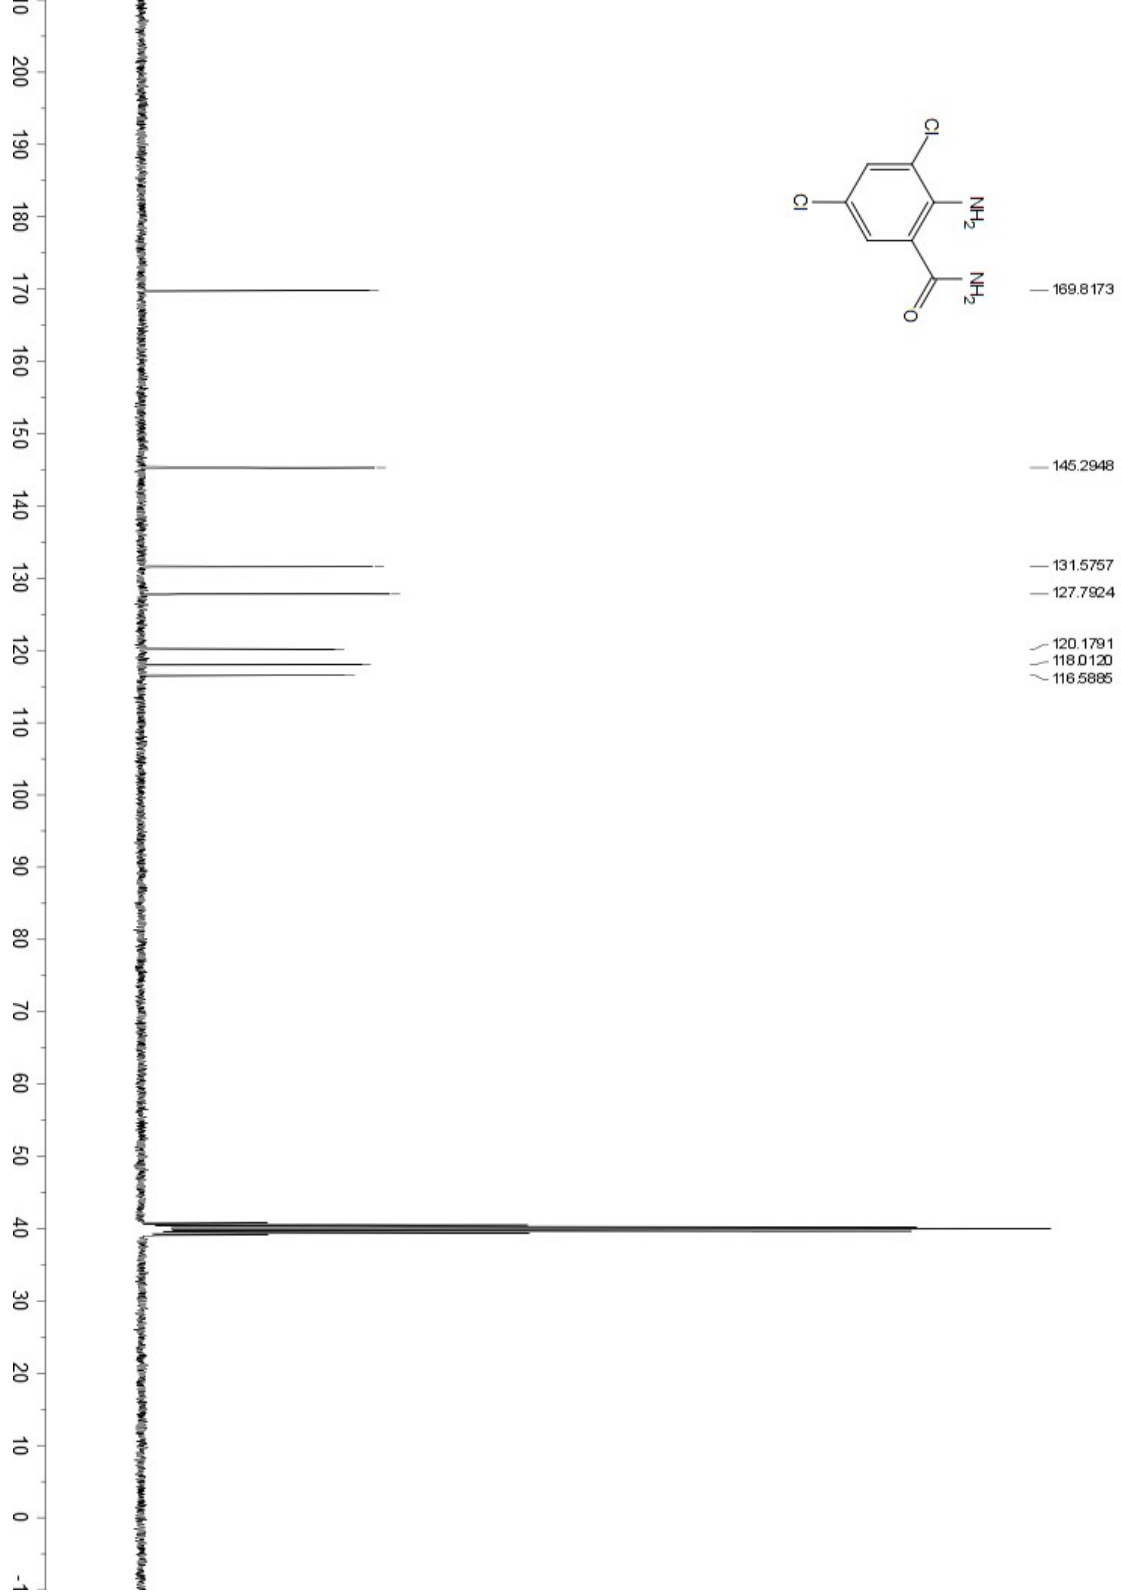

<sup>1</sup>H NMR of 2f

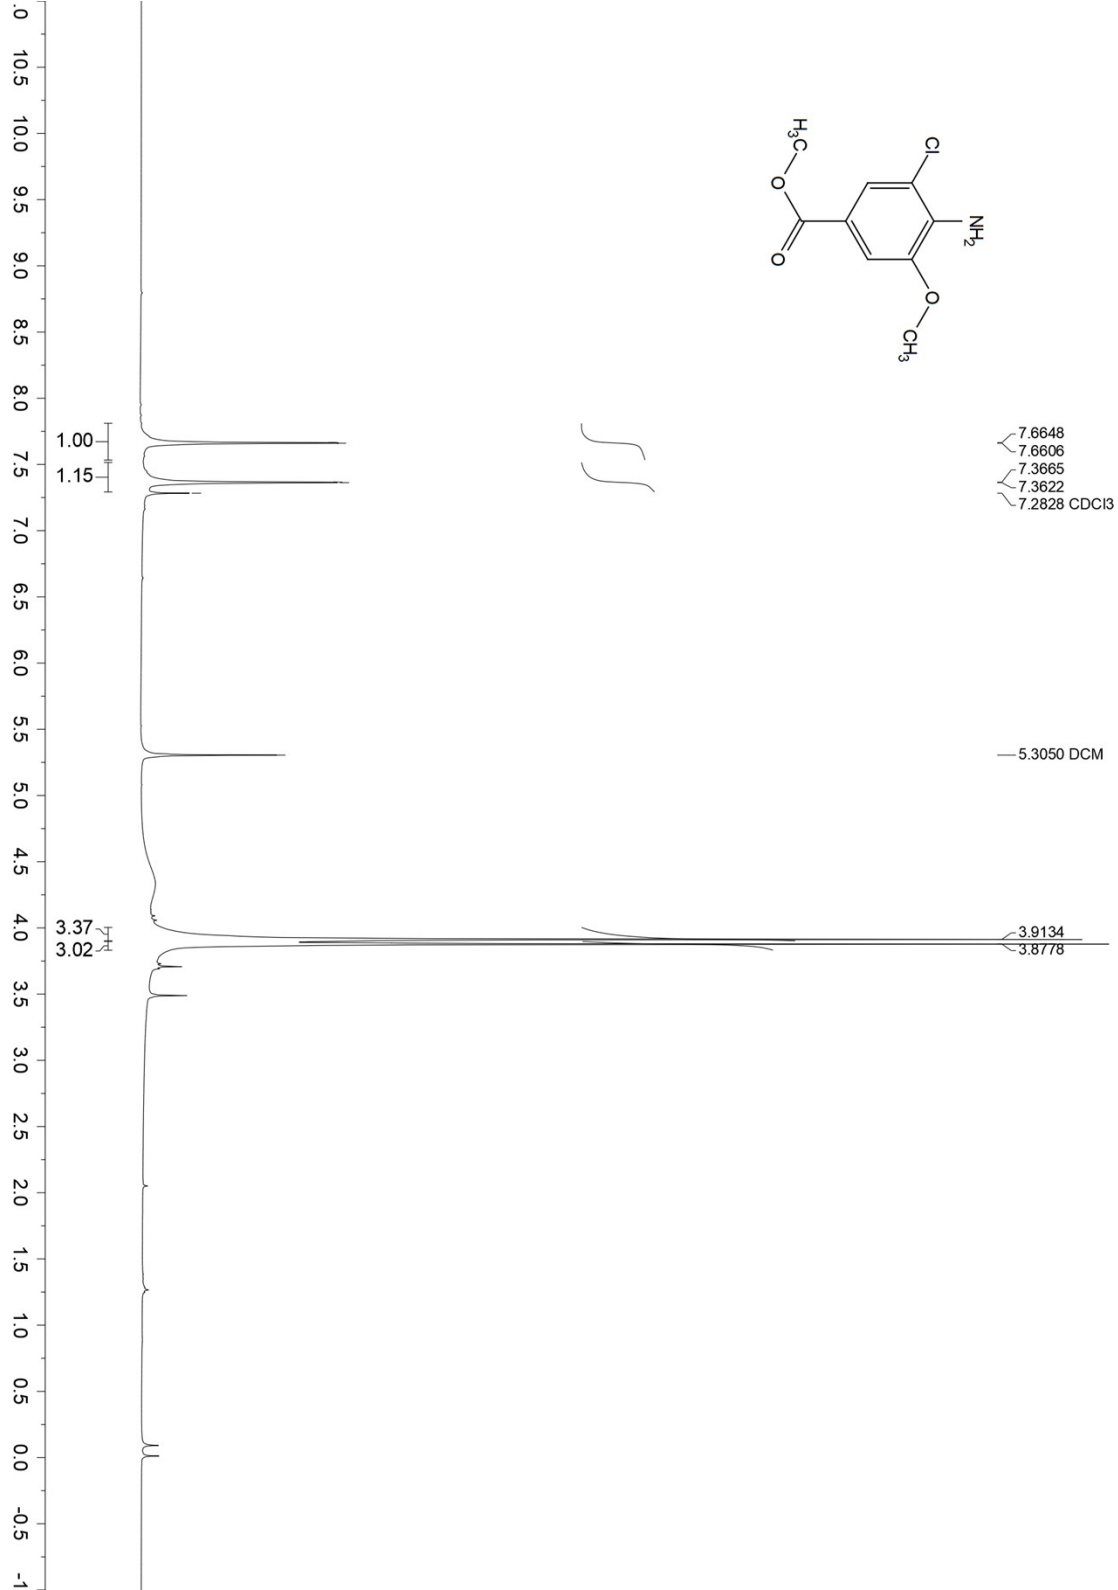

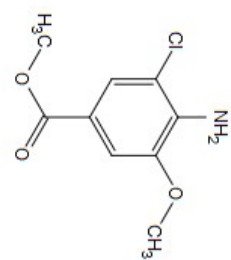

<sup>13</sup>C NMR of 2f

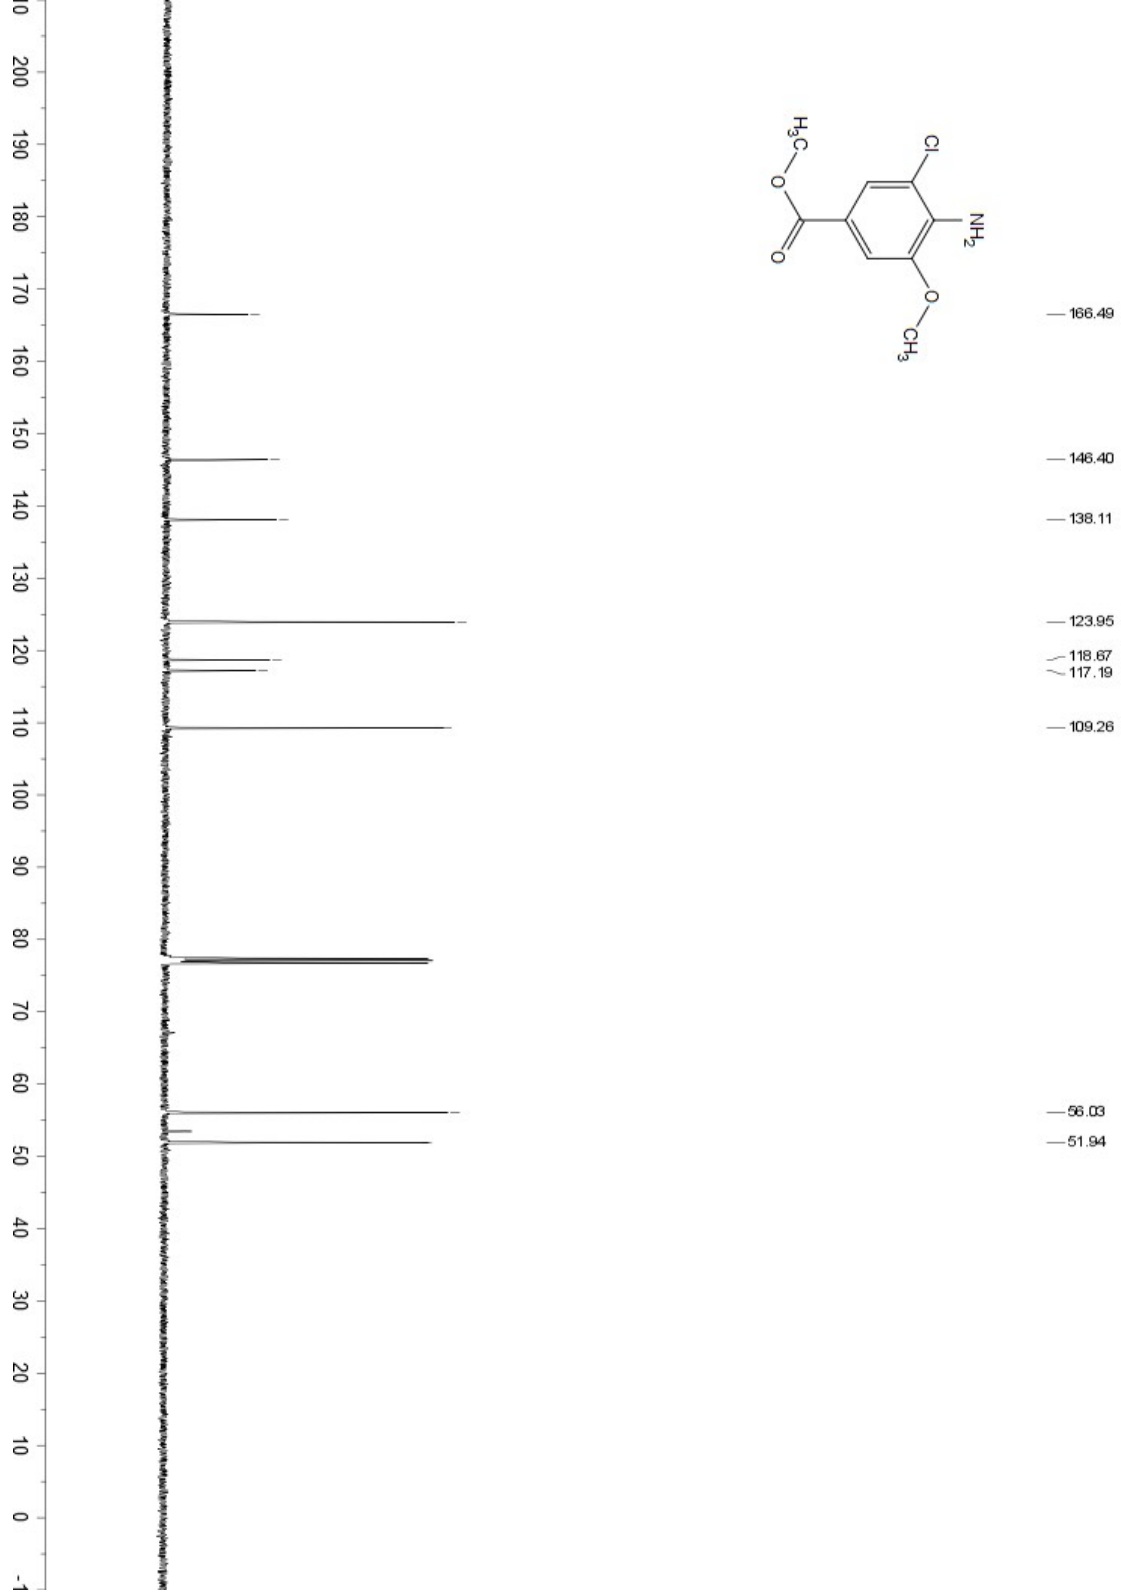

<sup>1</sup>H NMR of 2g

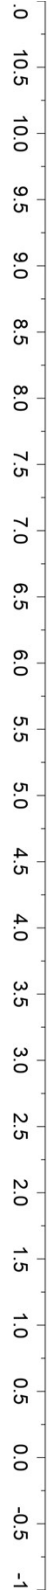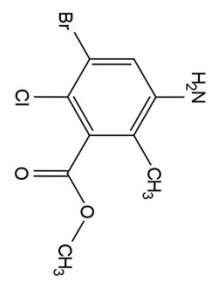

7.5231

4.3800

3.9047

2.3810

$^{13}\text{C}$  NMR of 2g

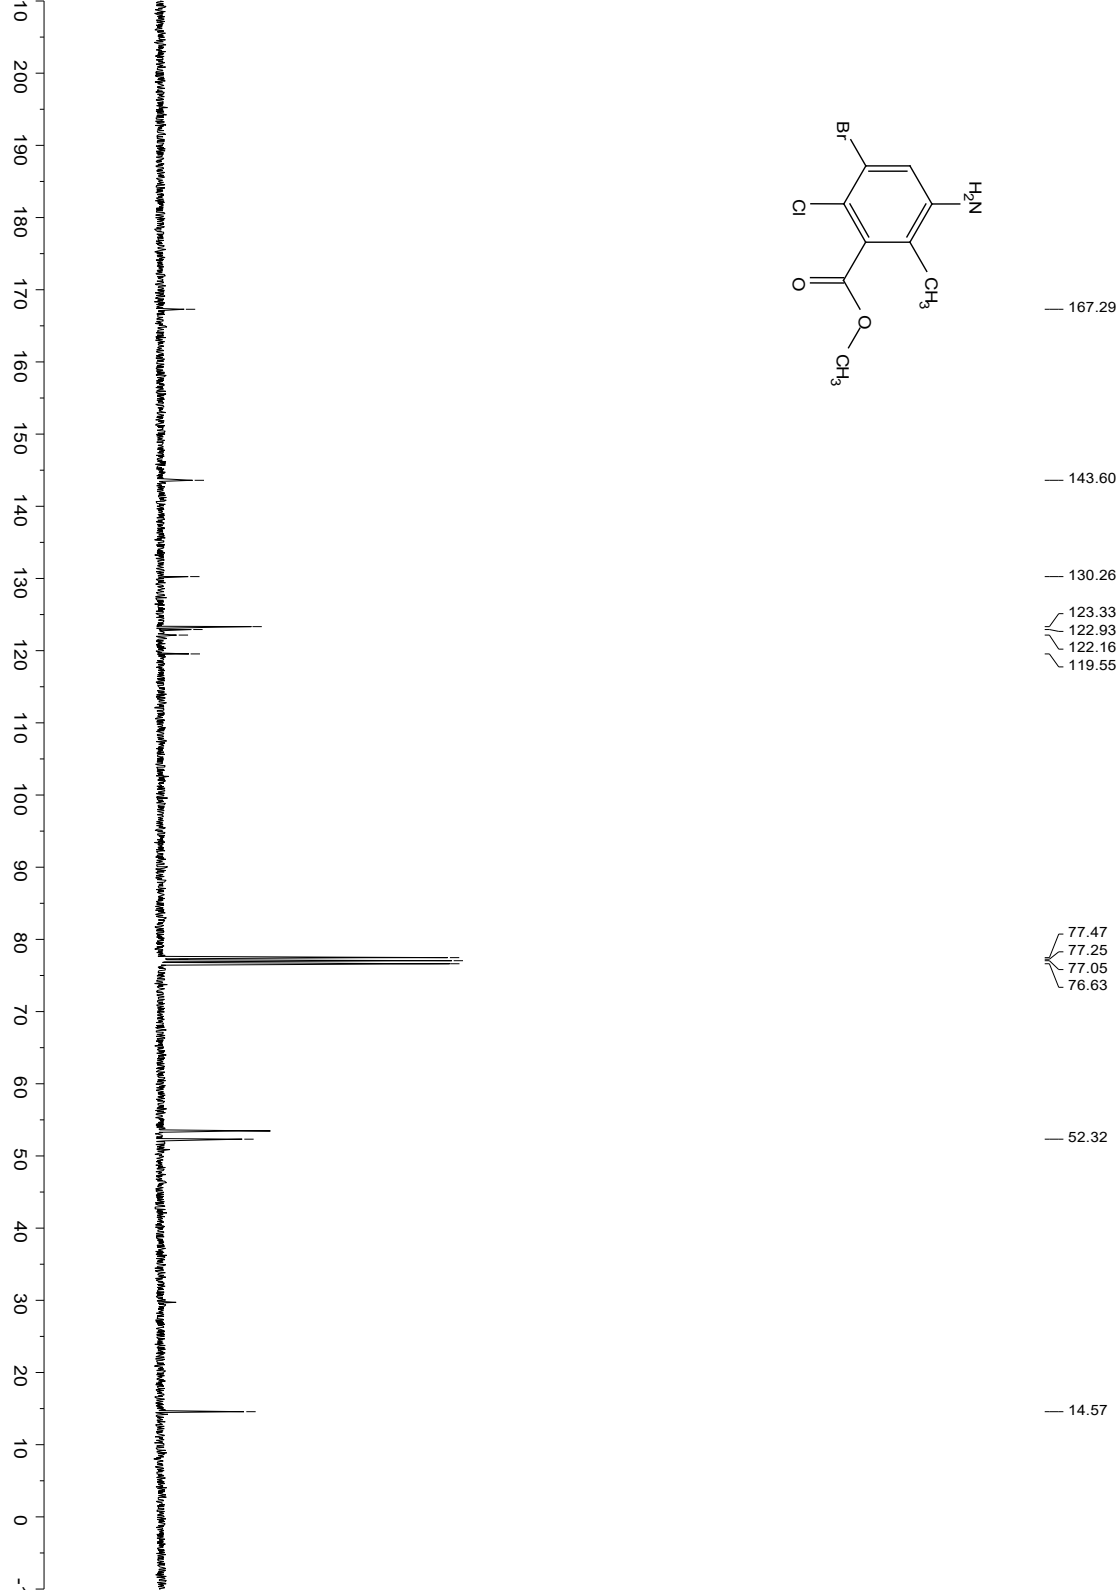

<sup>1</sup>H NMR of 2h

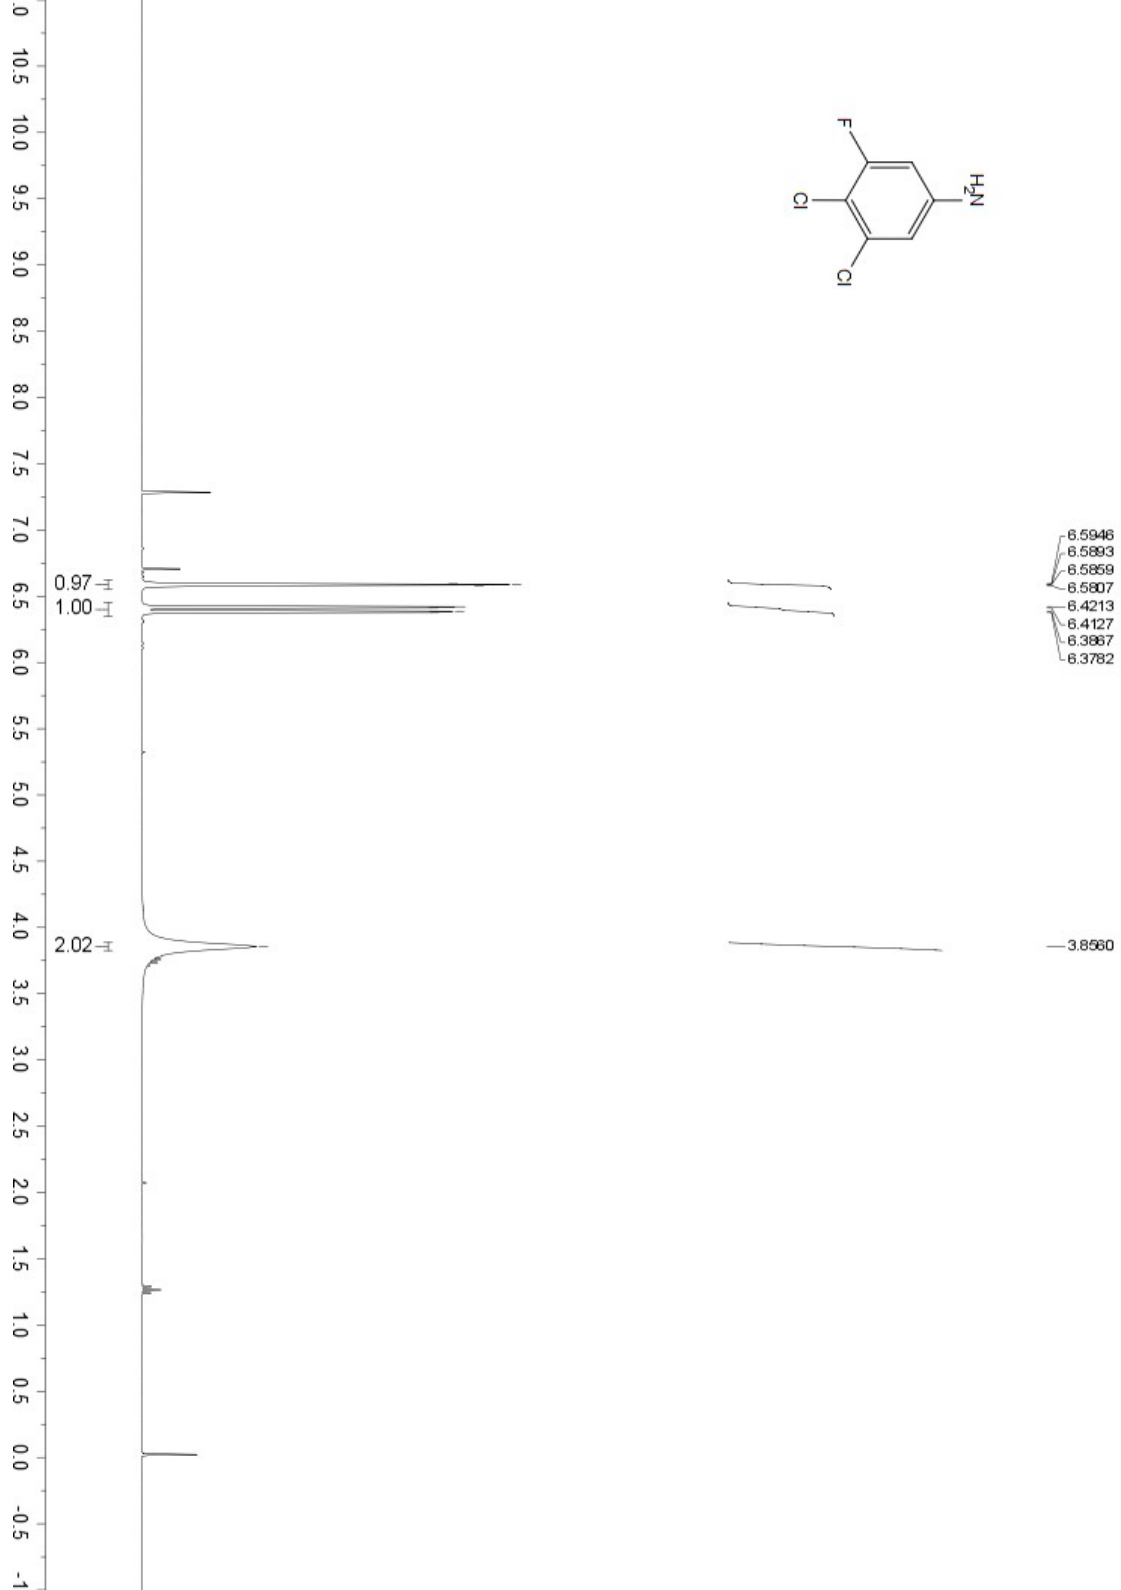



<sup>1</sup>H NMR of 2i

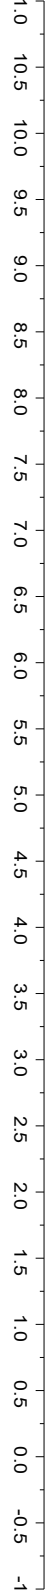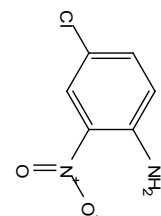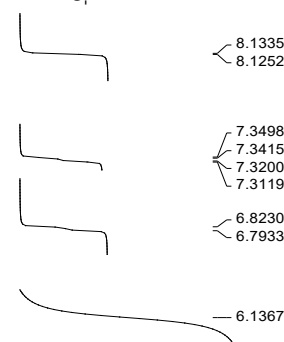

<sup>1</sup>H NMR of 2j

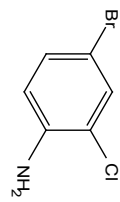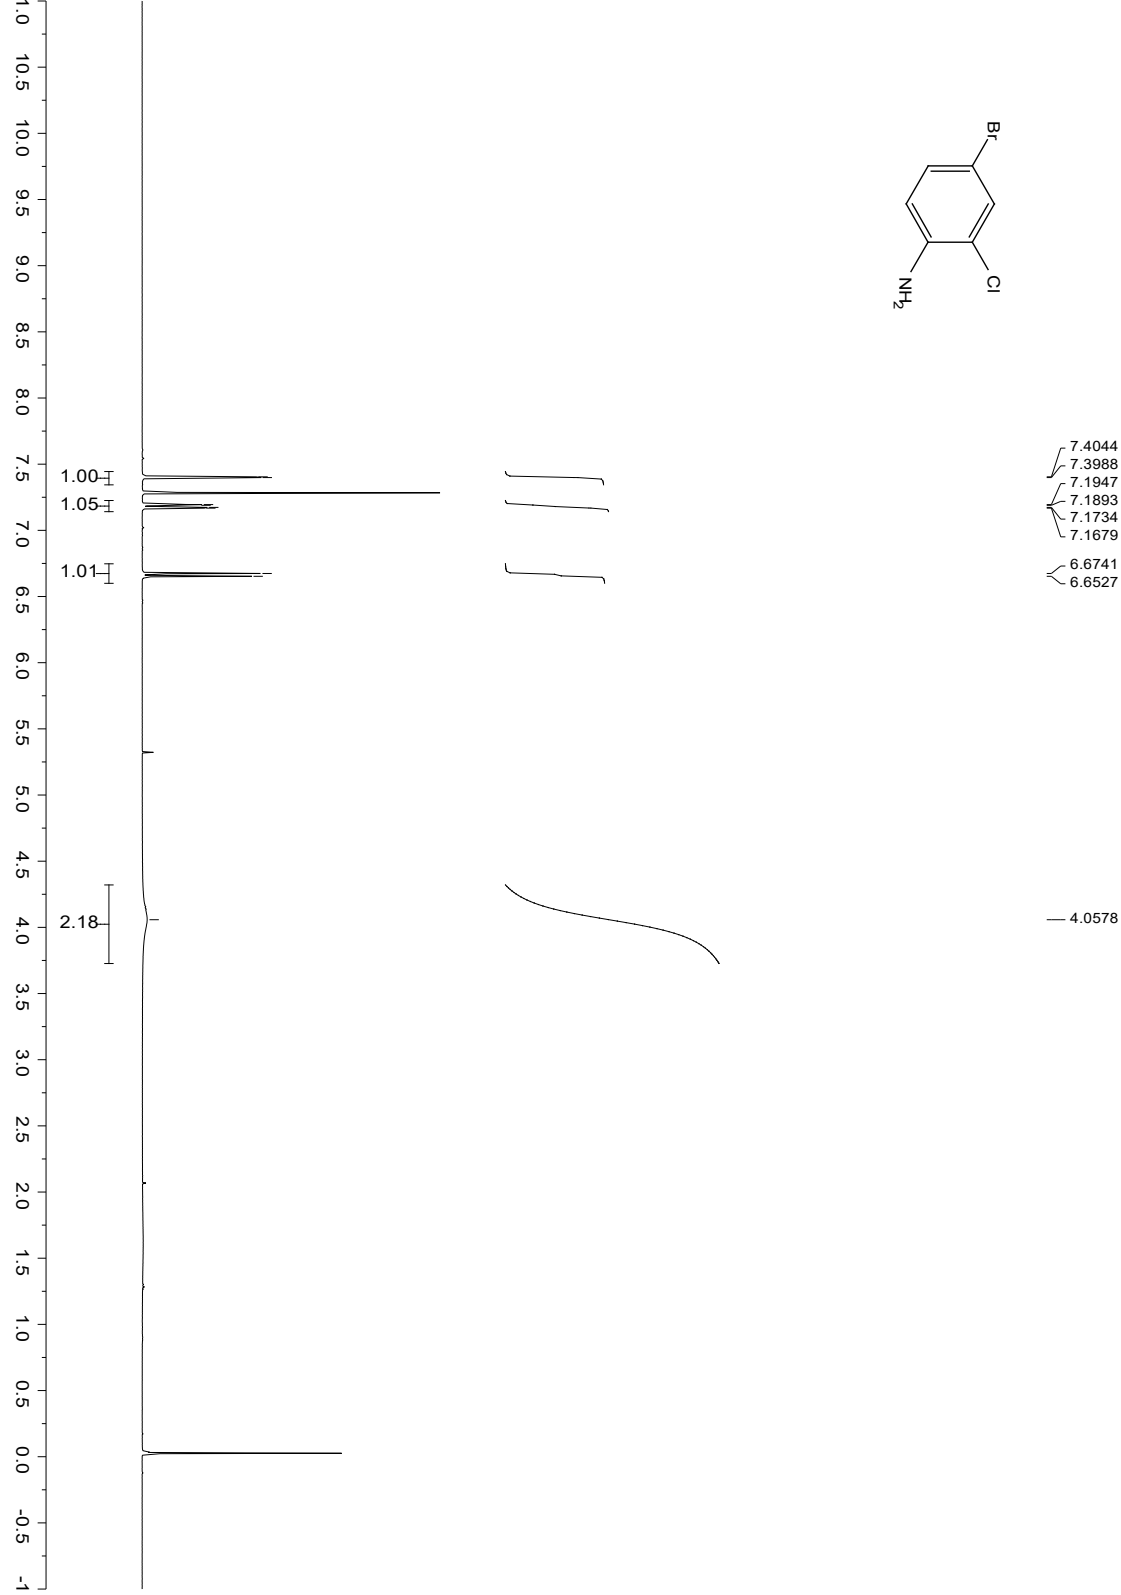

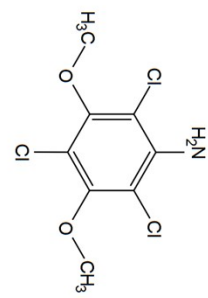

$^1\text{H}$  NMR of 2k

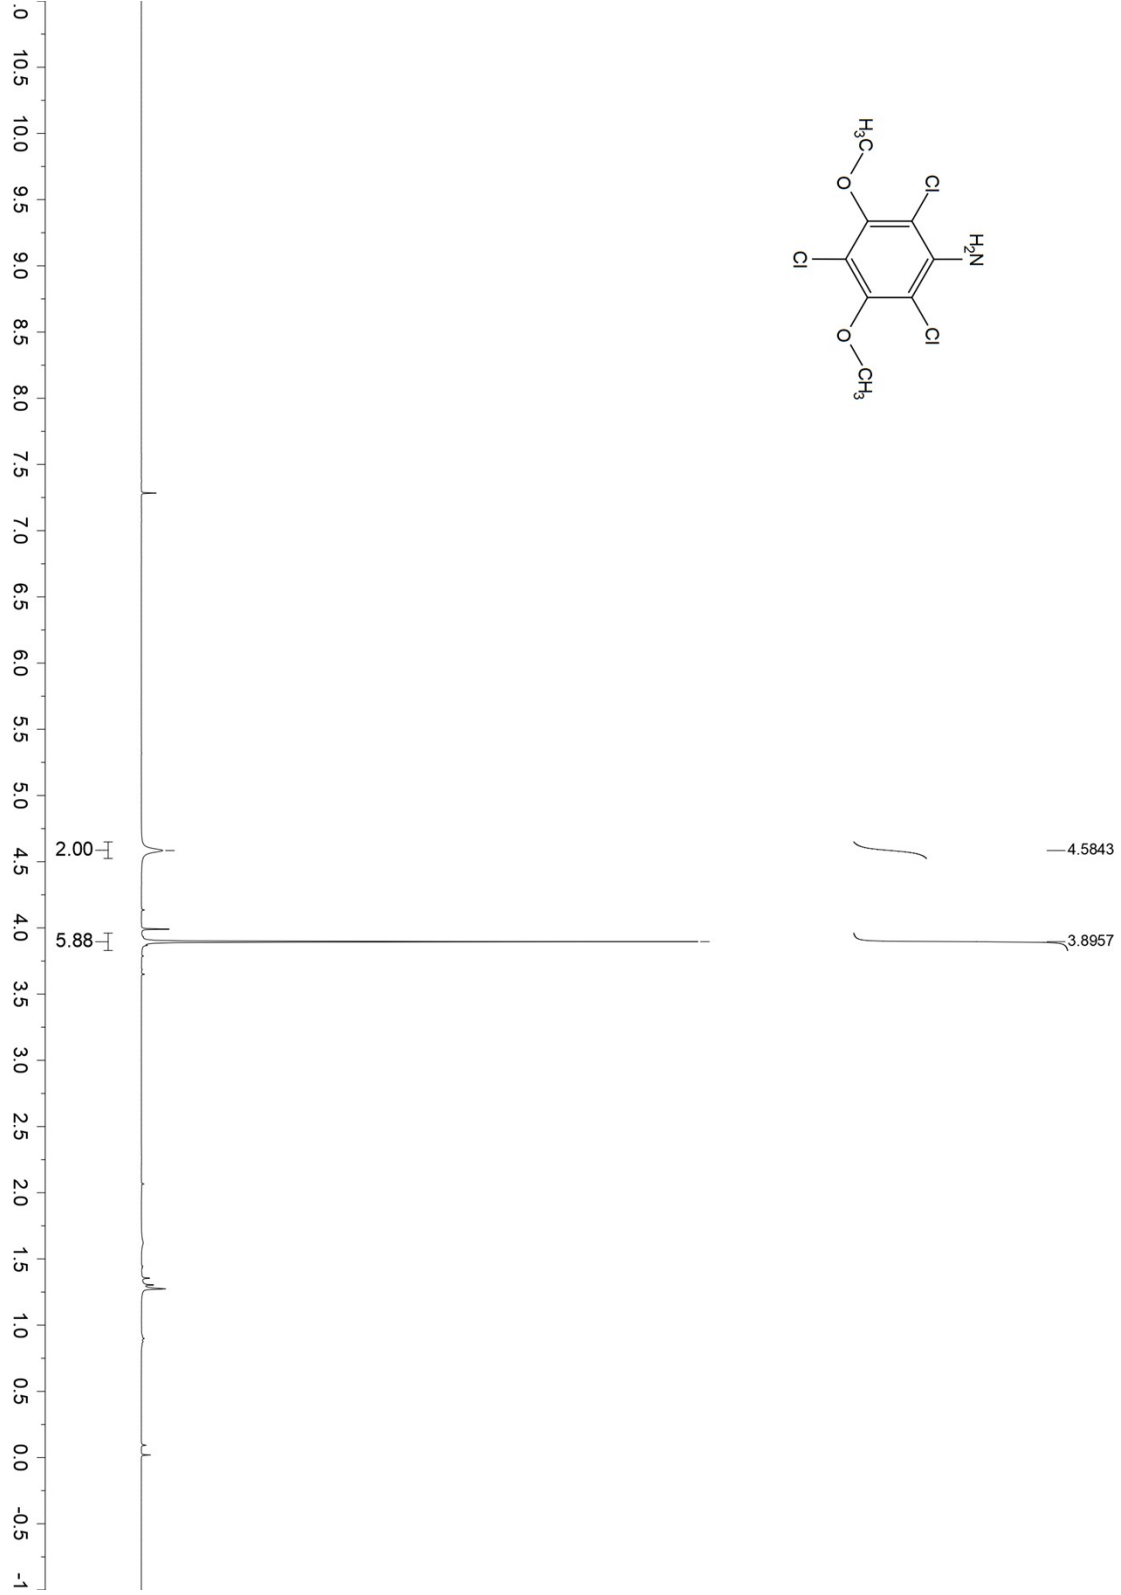

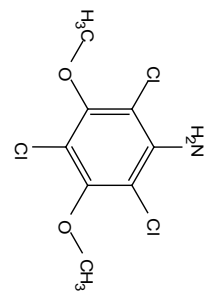

<sup>13</sup>C NMR of 2k

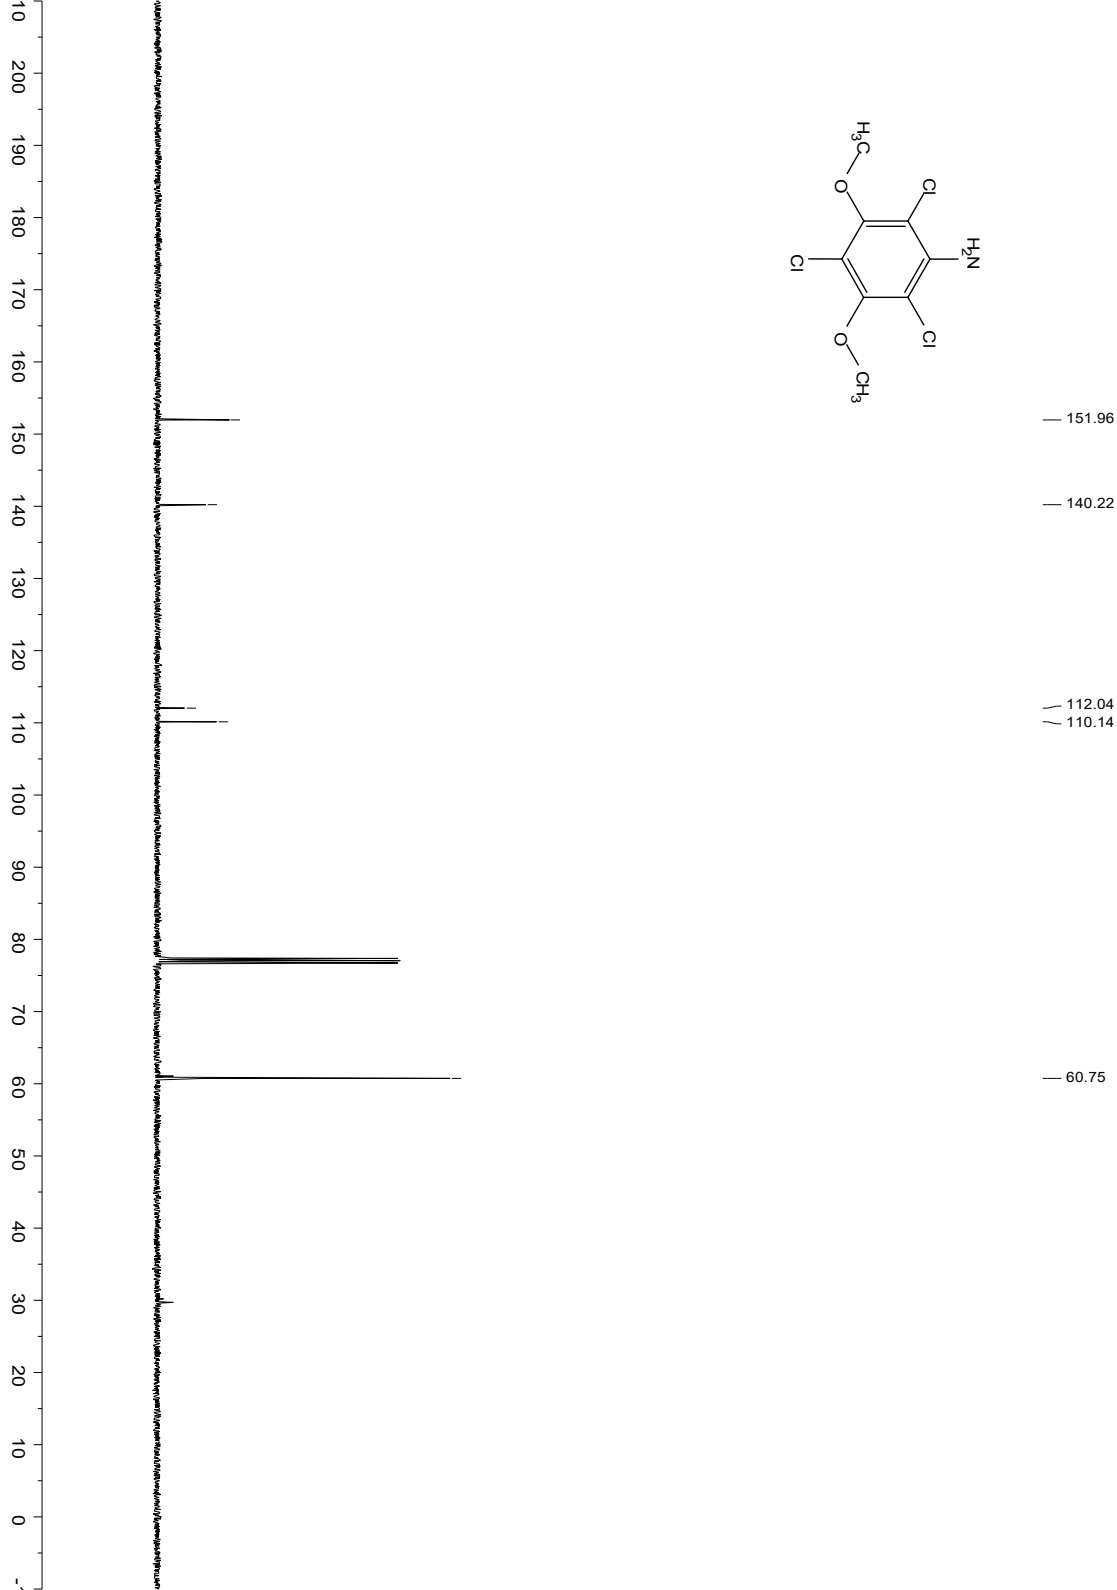

<sup>1</sup>H NMR of 21

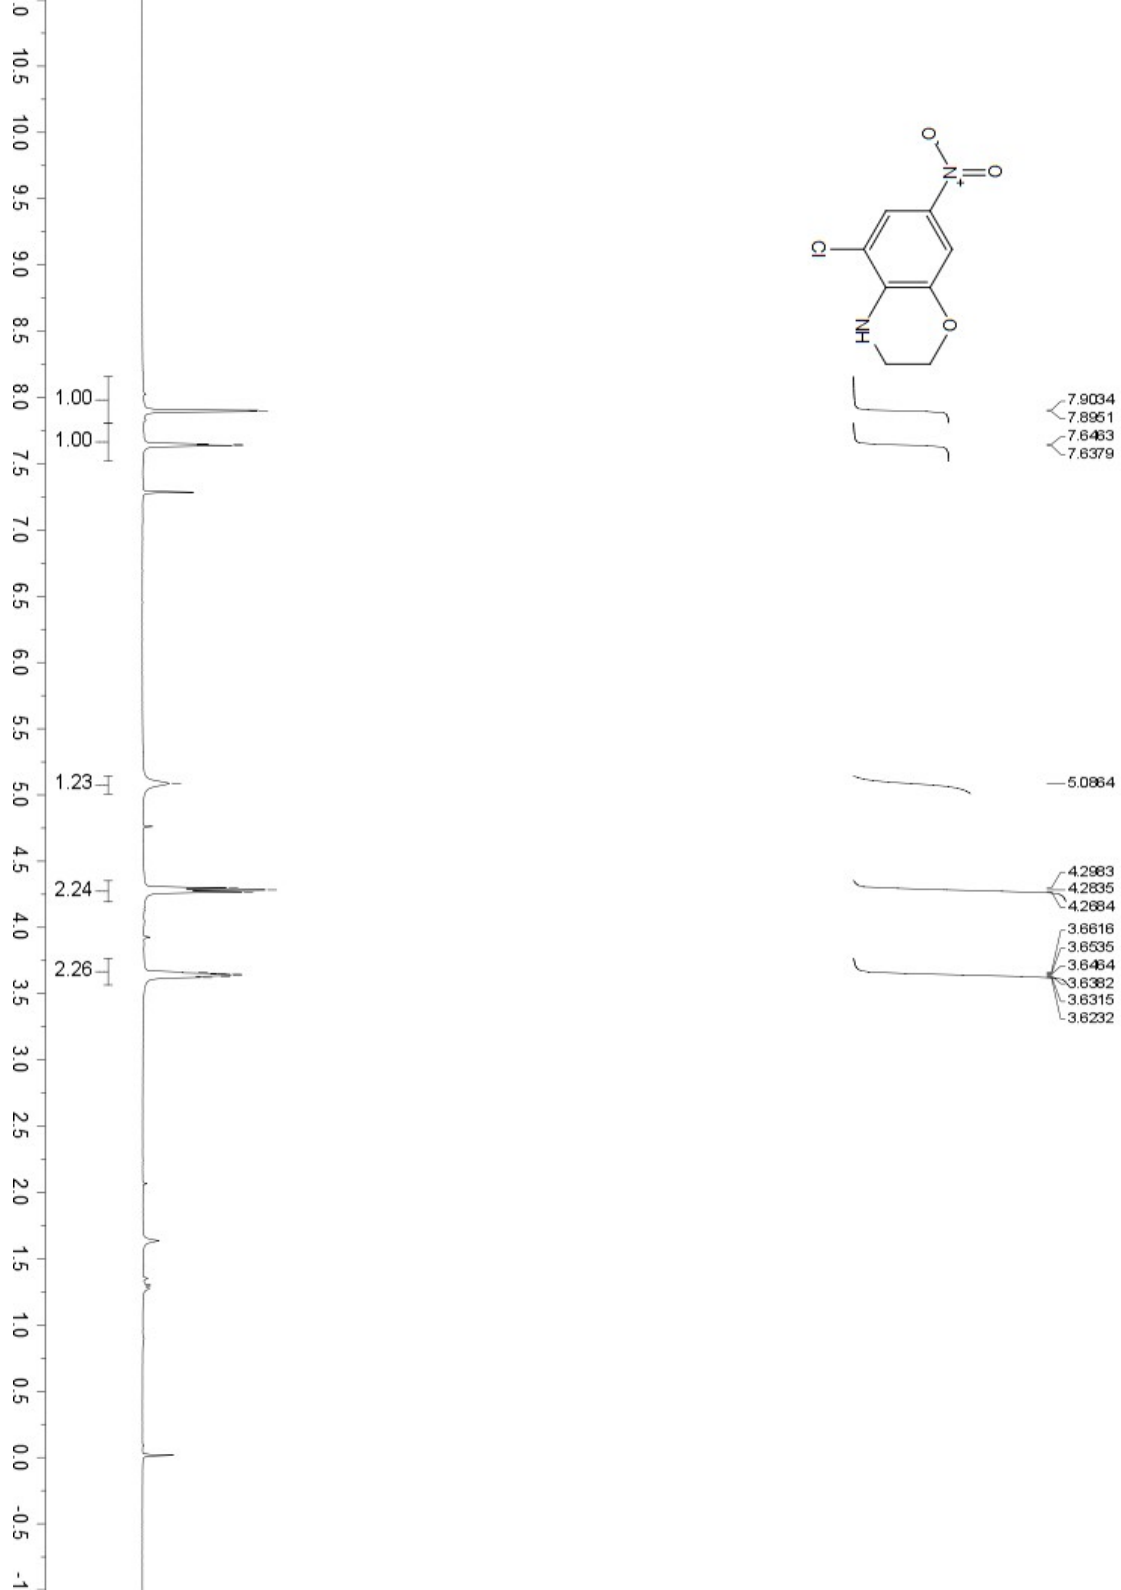

<sup>13</sup>C NMR of 2l

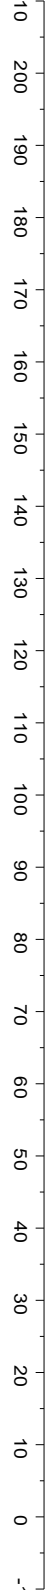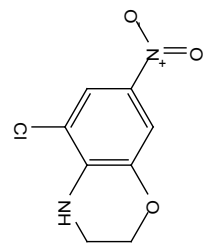

— 142.32  
/ 137.27  
/ 136.98

— 118.73  
/ 116.99  
— 111.31

— 64.12

— 40.27

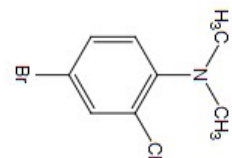

<sup>1</sup>H NMR of 2m

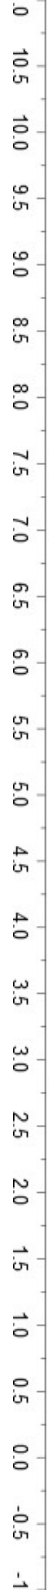

6.18  
1.00  
1.11  
1.11

7.5115  
7.5038  
7.3486  
7.3409  
7.3372  
7.3199  
7.3122  
7.3067

<sup>1</sup>H NMR of 2n

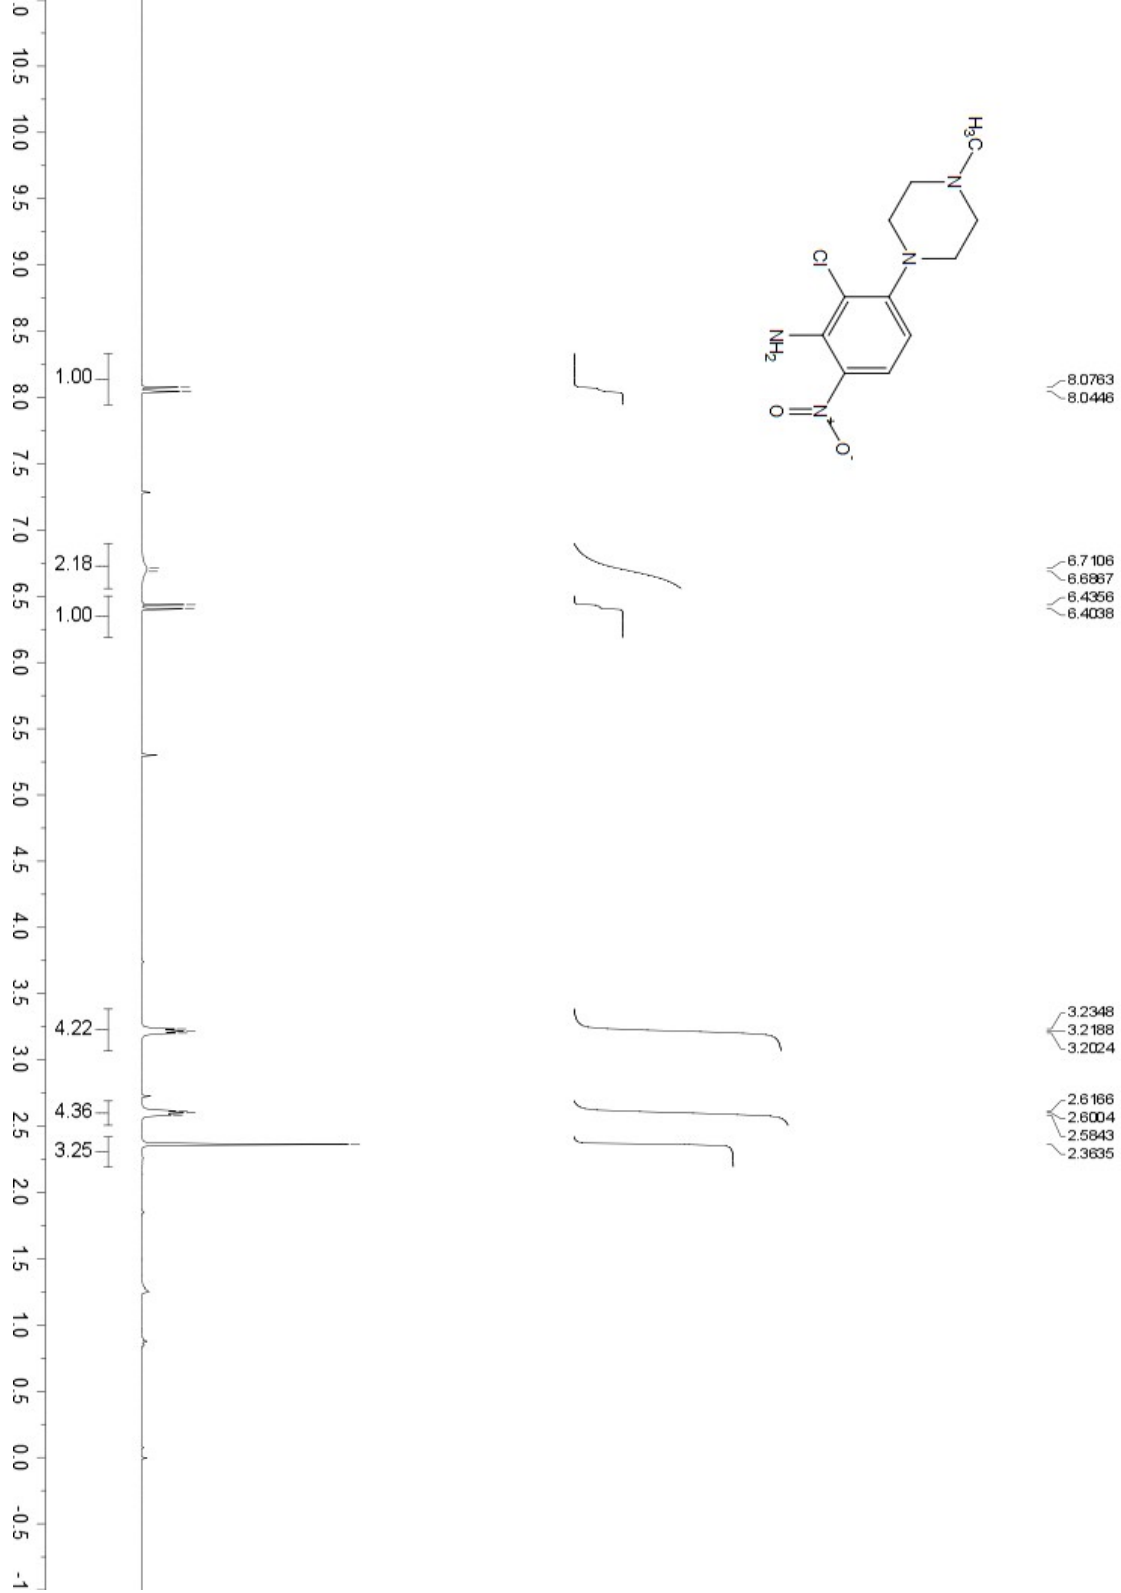



$^{13}\text{C}$  NMR of 2n

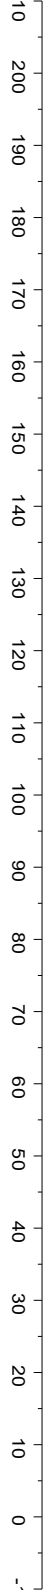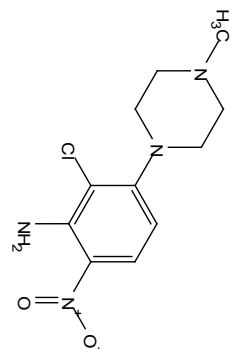

- 155.27
- 143.15
- 128.28
- 125.72
- 112.28
- 108.17
- 54.95
- 50.48
- 46.06

<sup>1</sup>H NMR of 2o

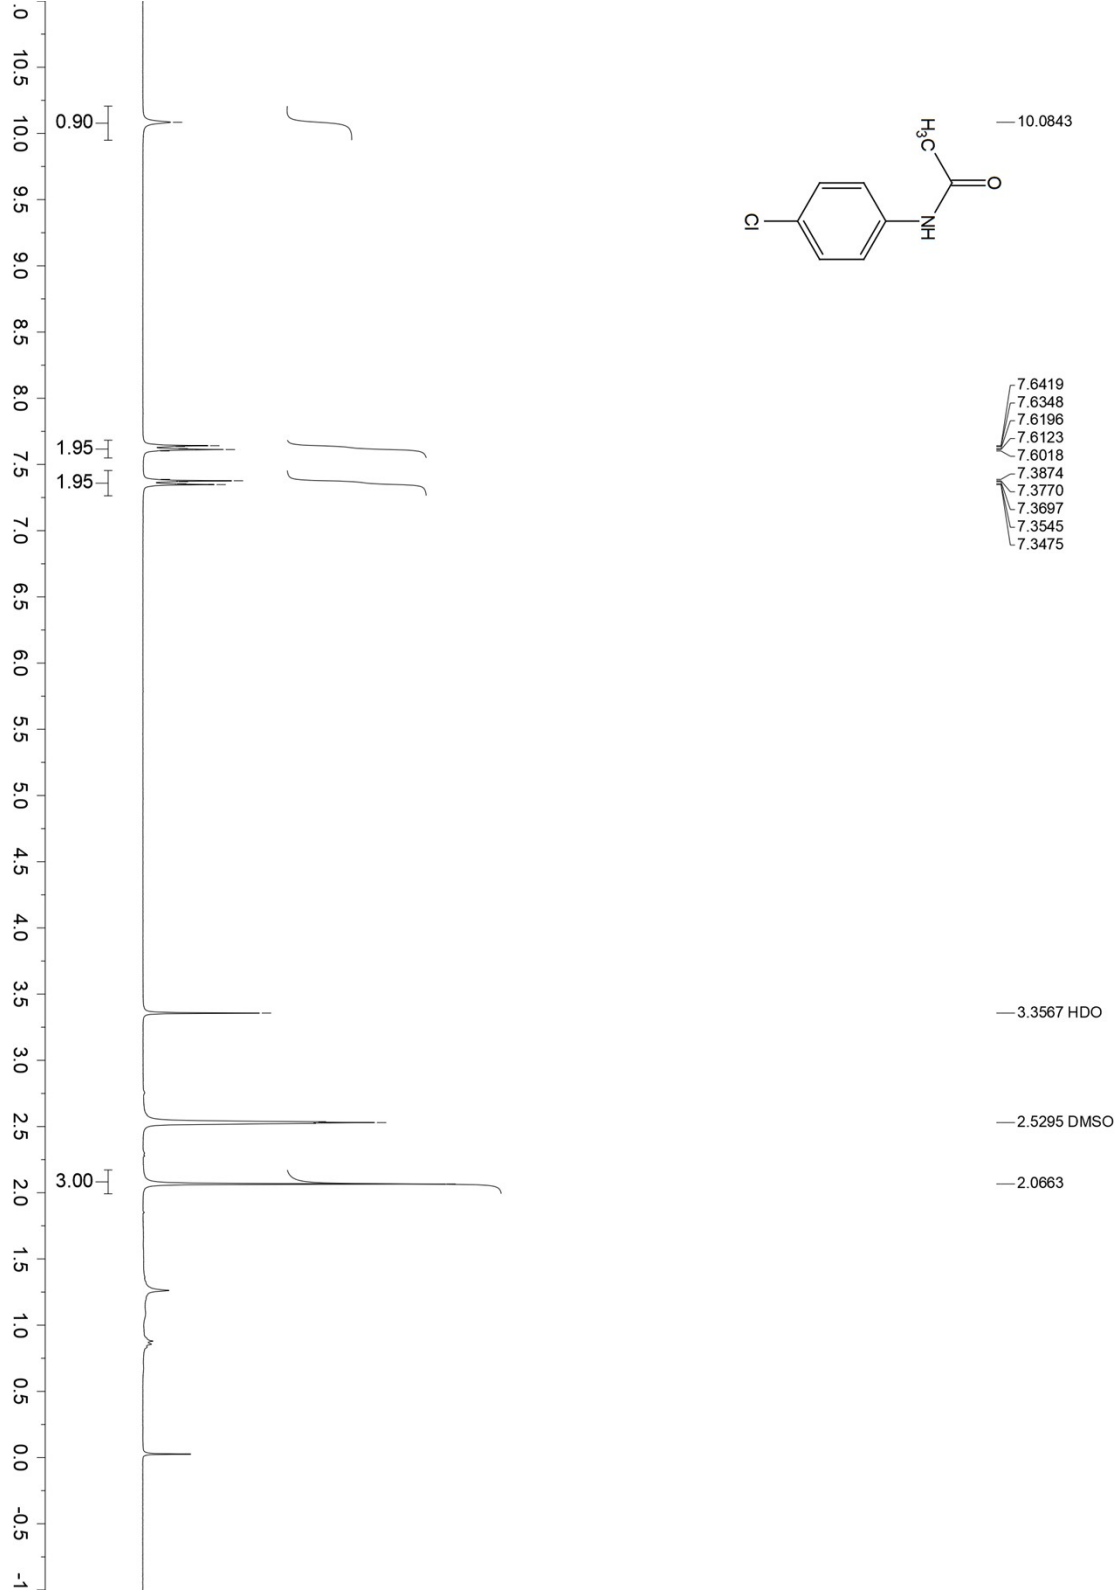

<sup>1</sup>H NMR of 2p

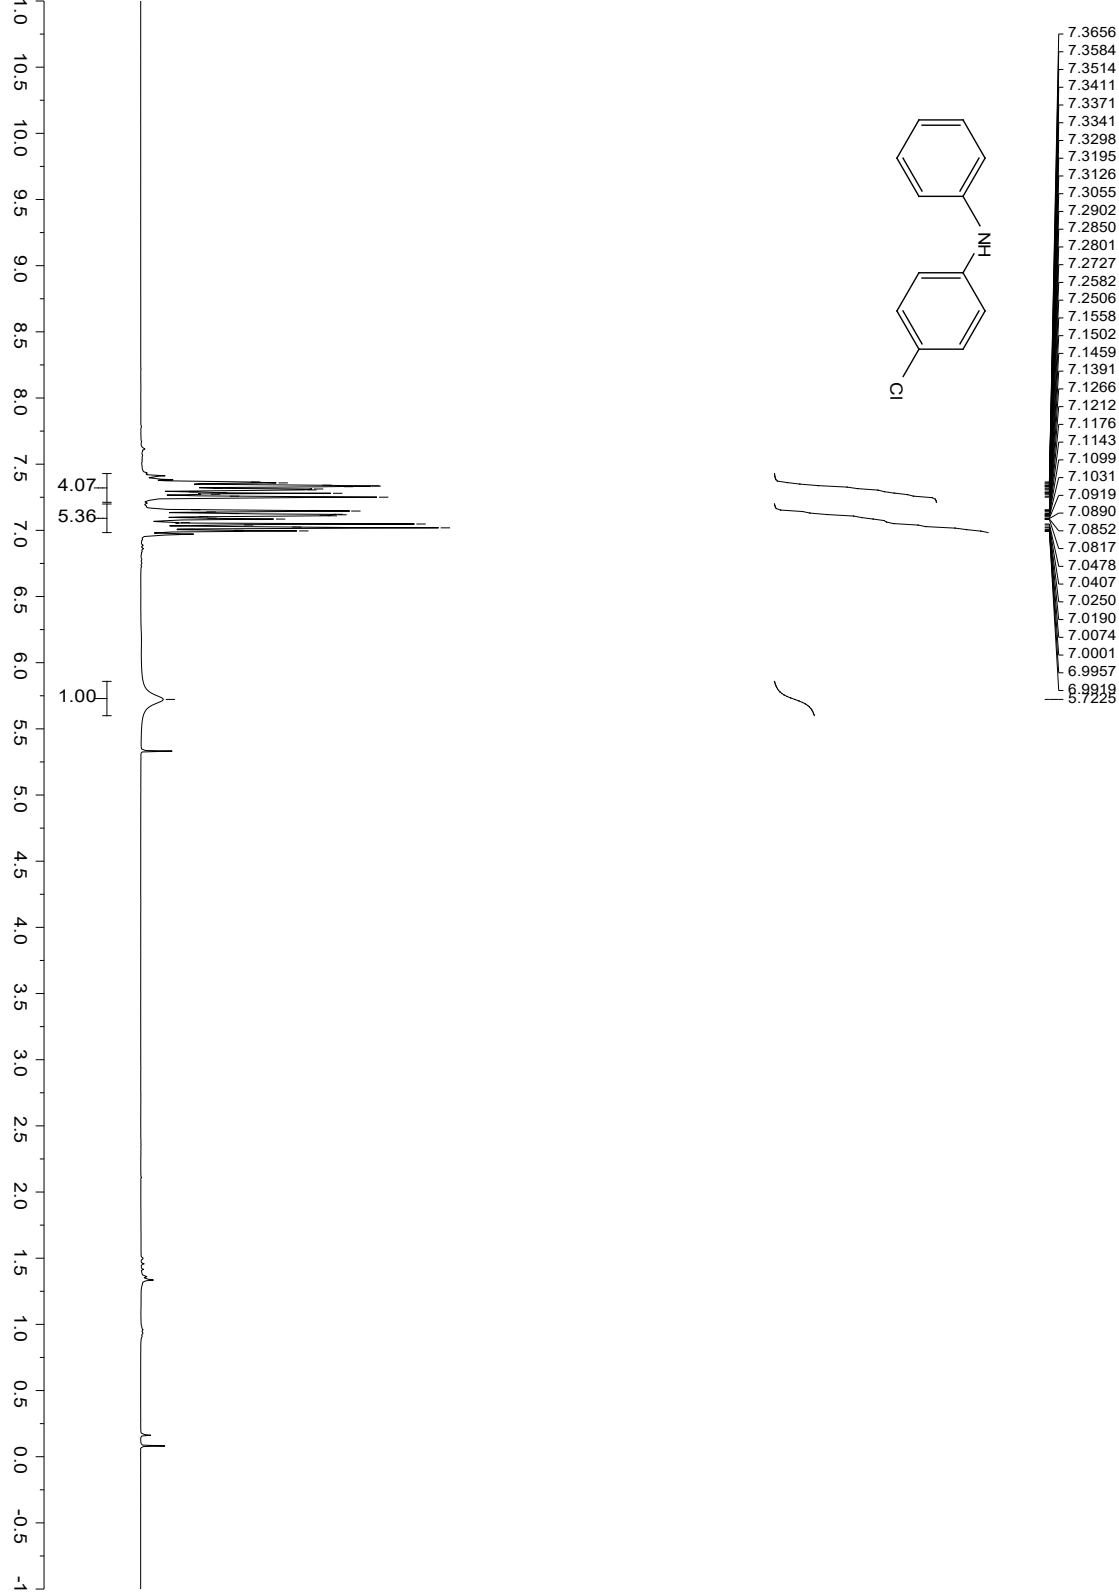

<sup>1</sup>H NMR of 2q

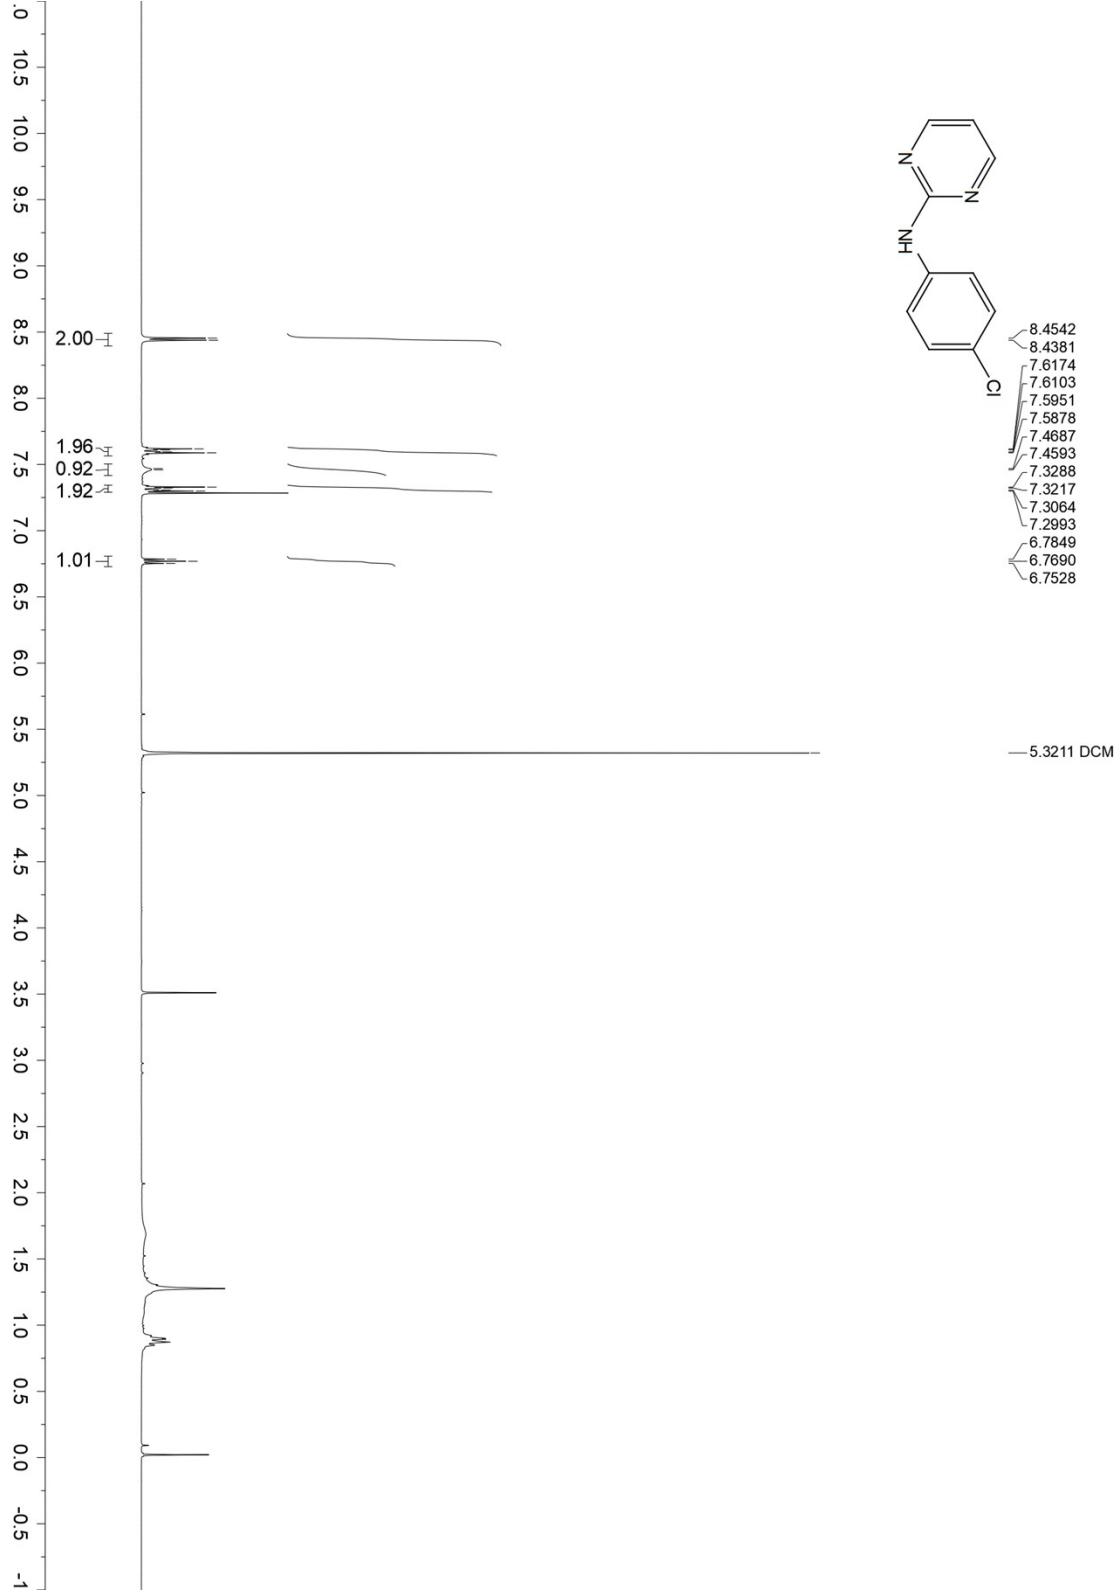

<sup>1</sup>H NMR of 2r

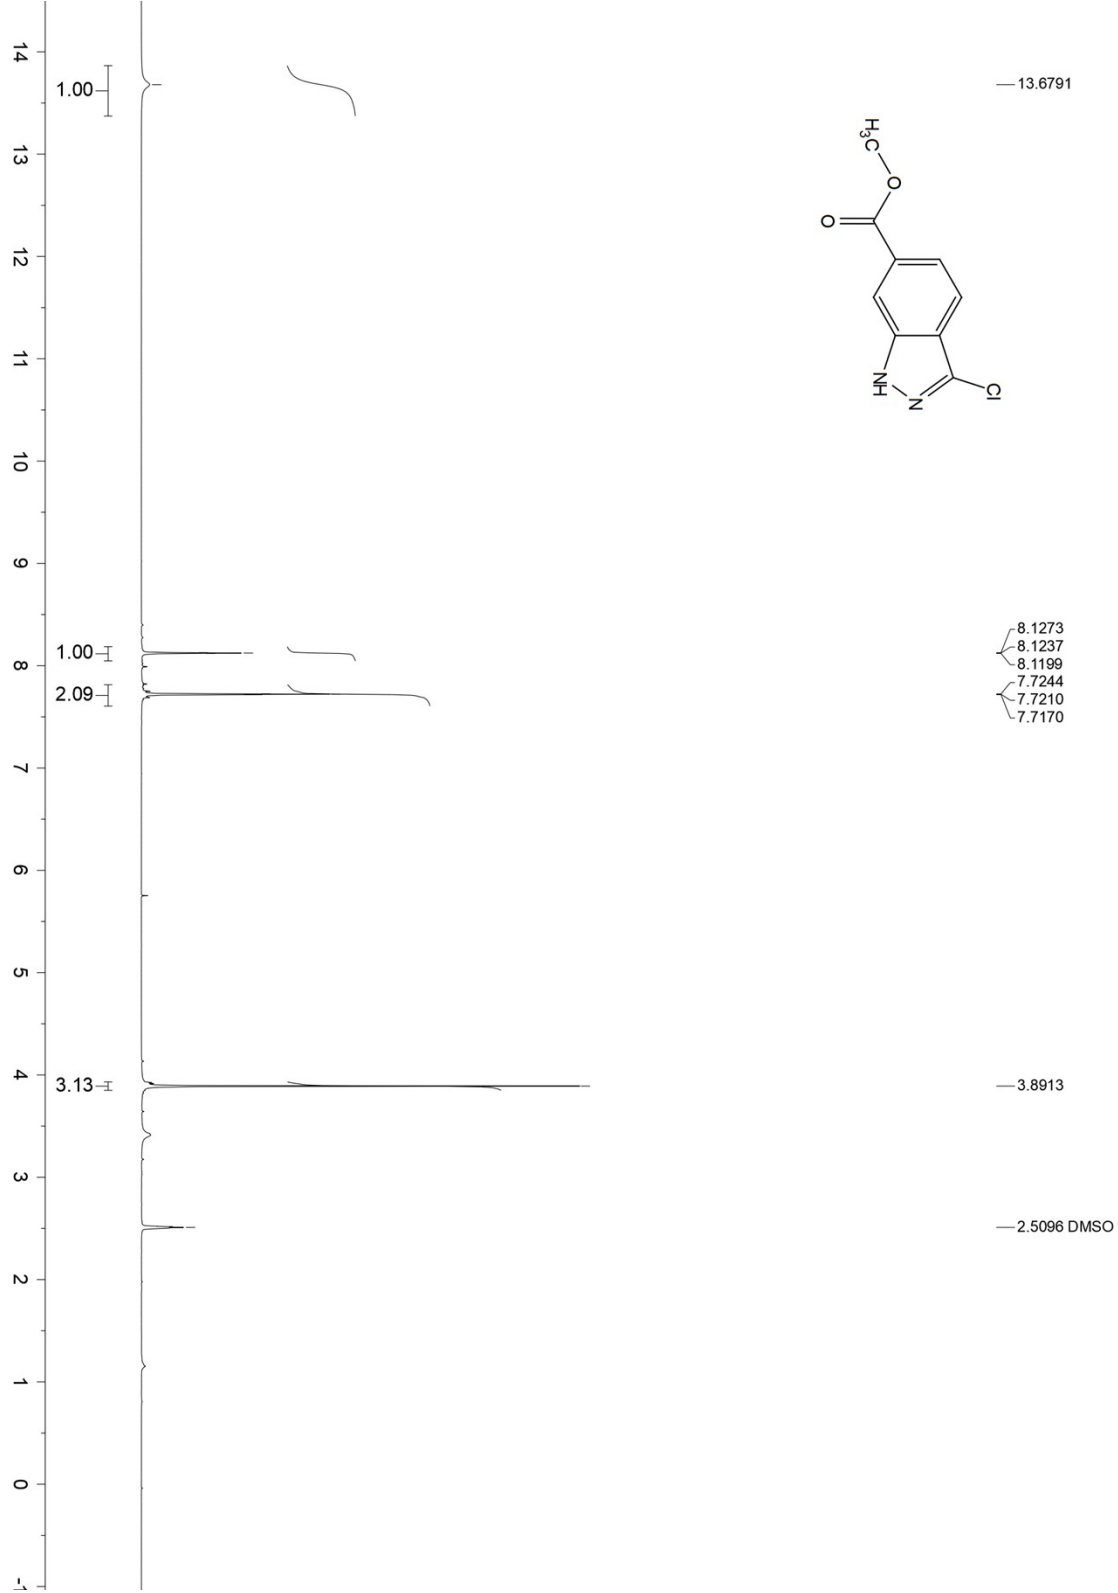

<sup>13</sup>C NMR of 2r

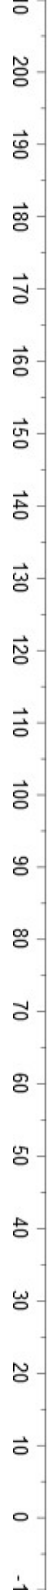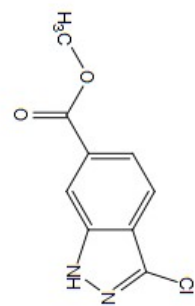

— 166.5887

— 140.9138

— 132.9125

— 128.9841

— 122.2772

— 121.6530

— 119.4932

— 113.3934

— 52.8885

$^1\text{H}$  NMR of 2s

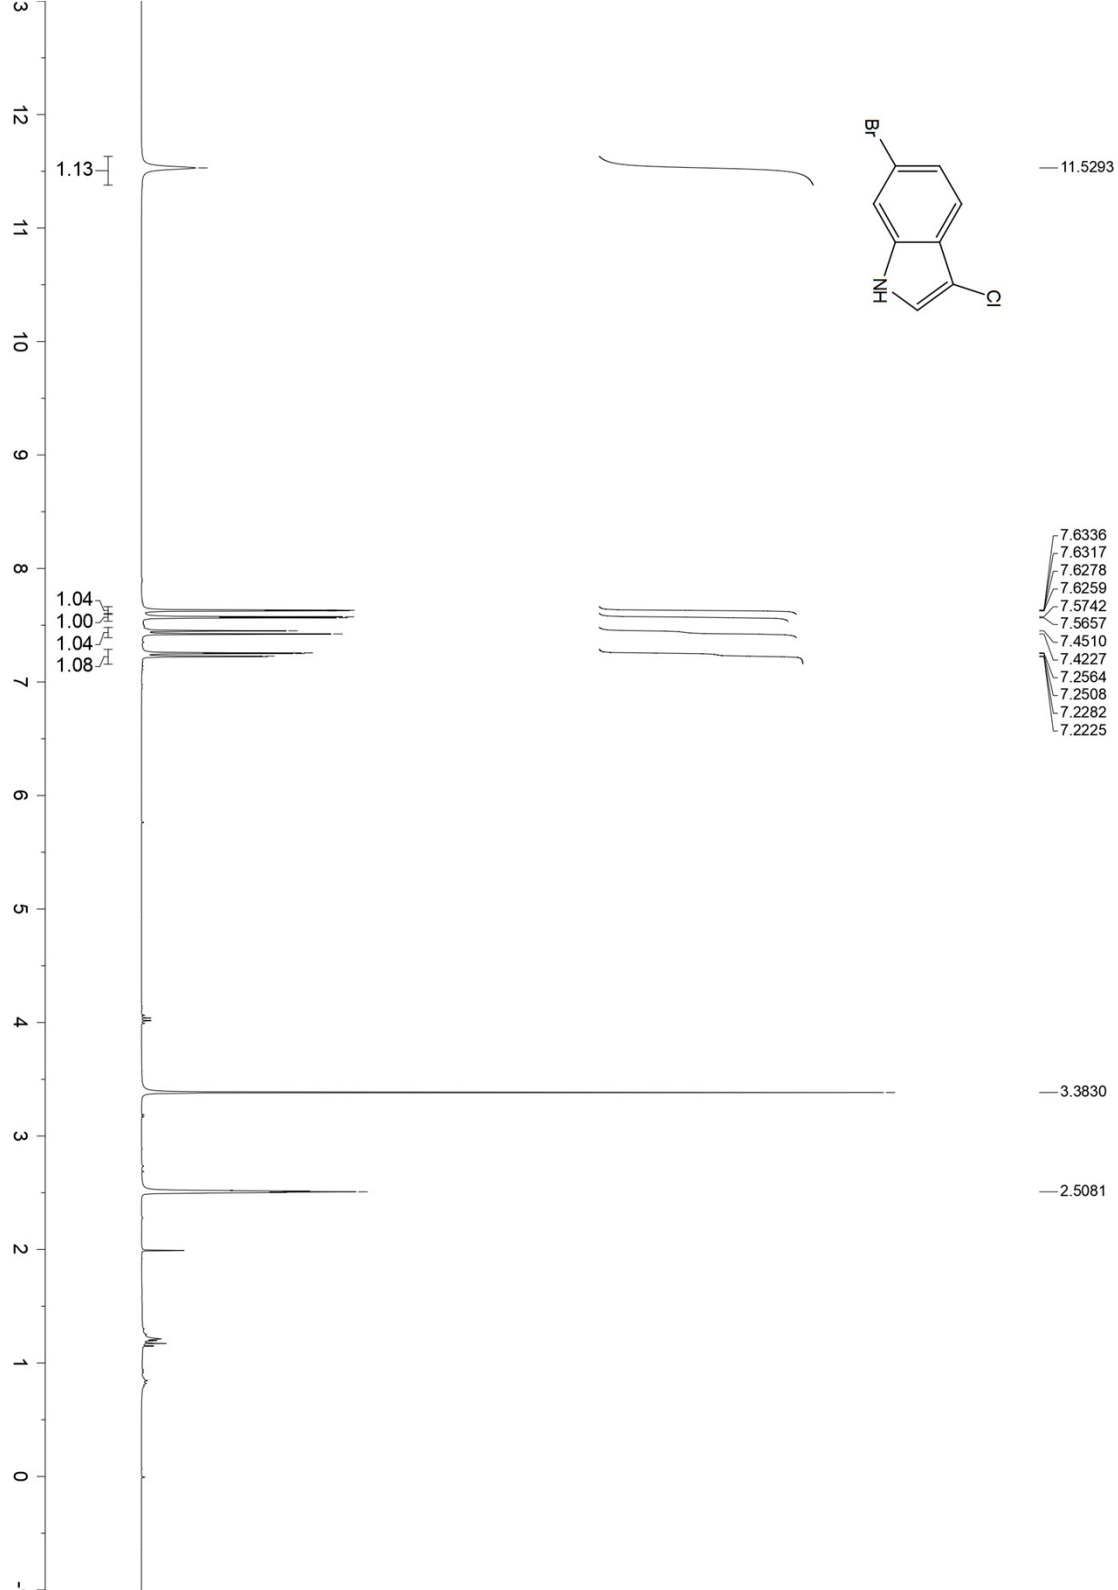

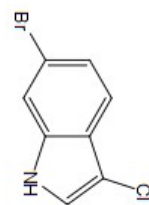

$^{13}\text{C}$  NMR of 2s

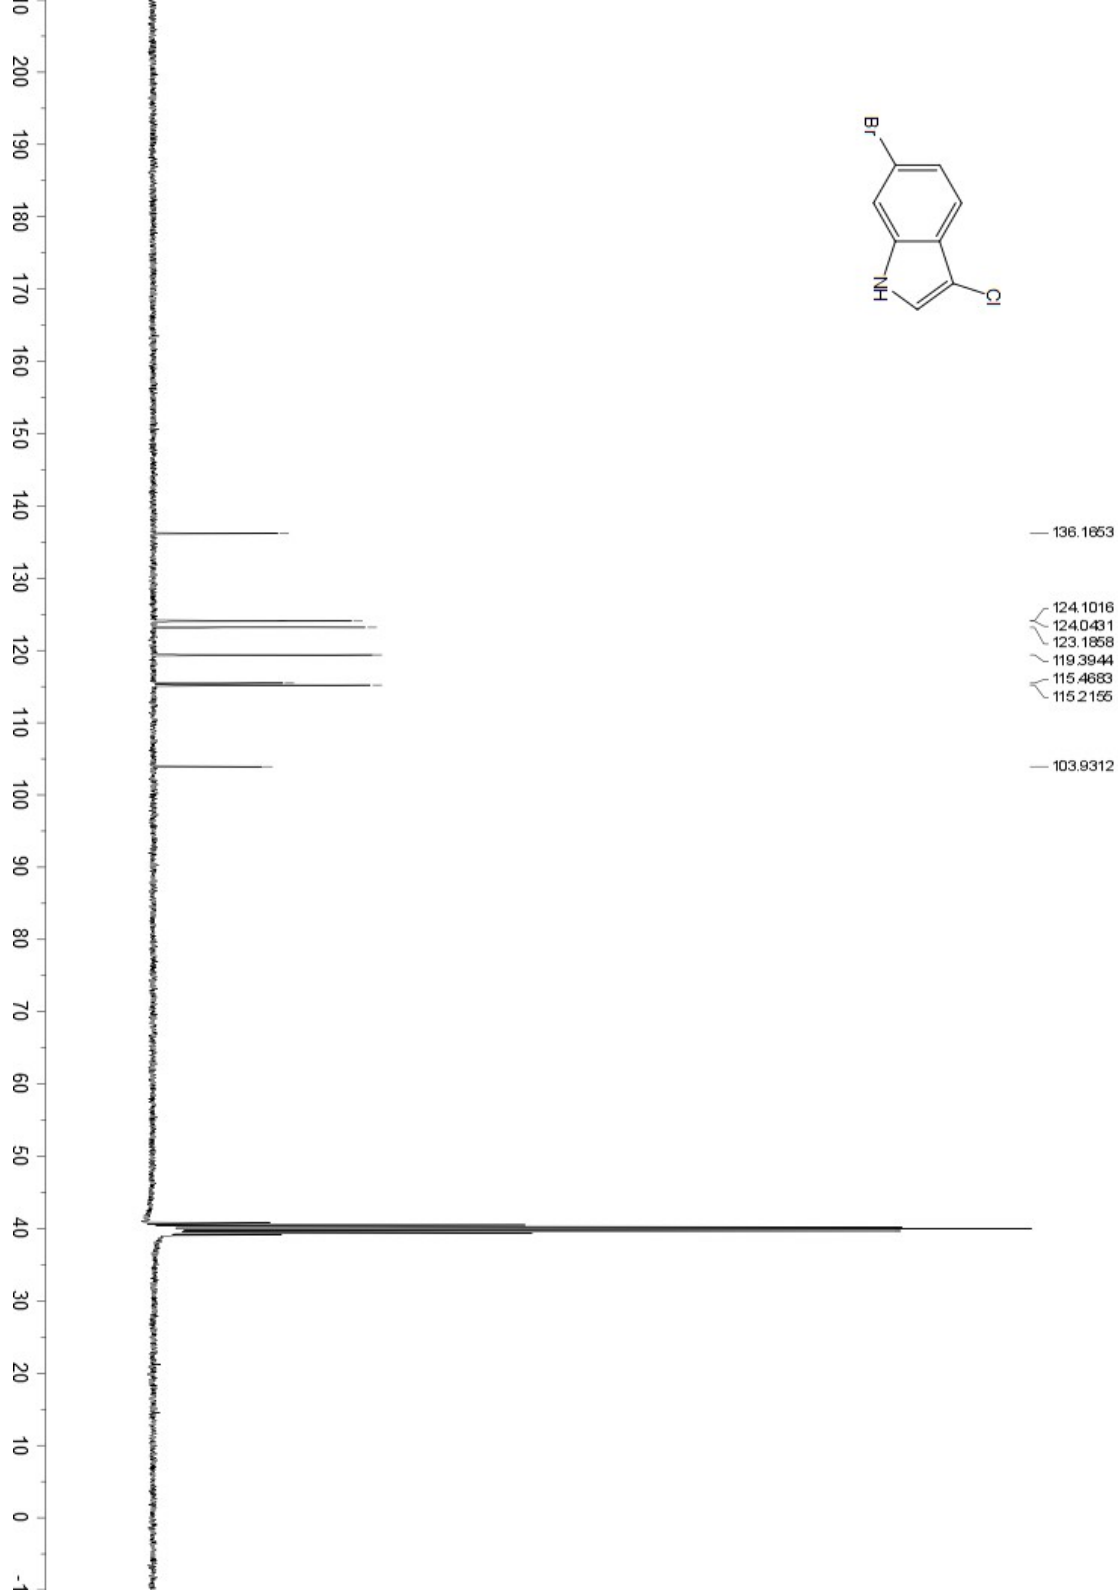



<sup>1</sup>H NMR of 2u

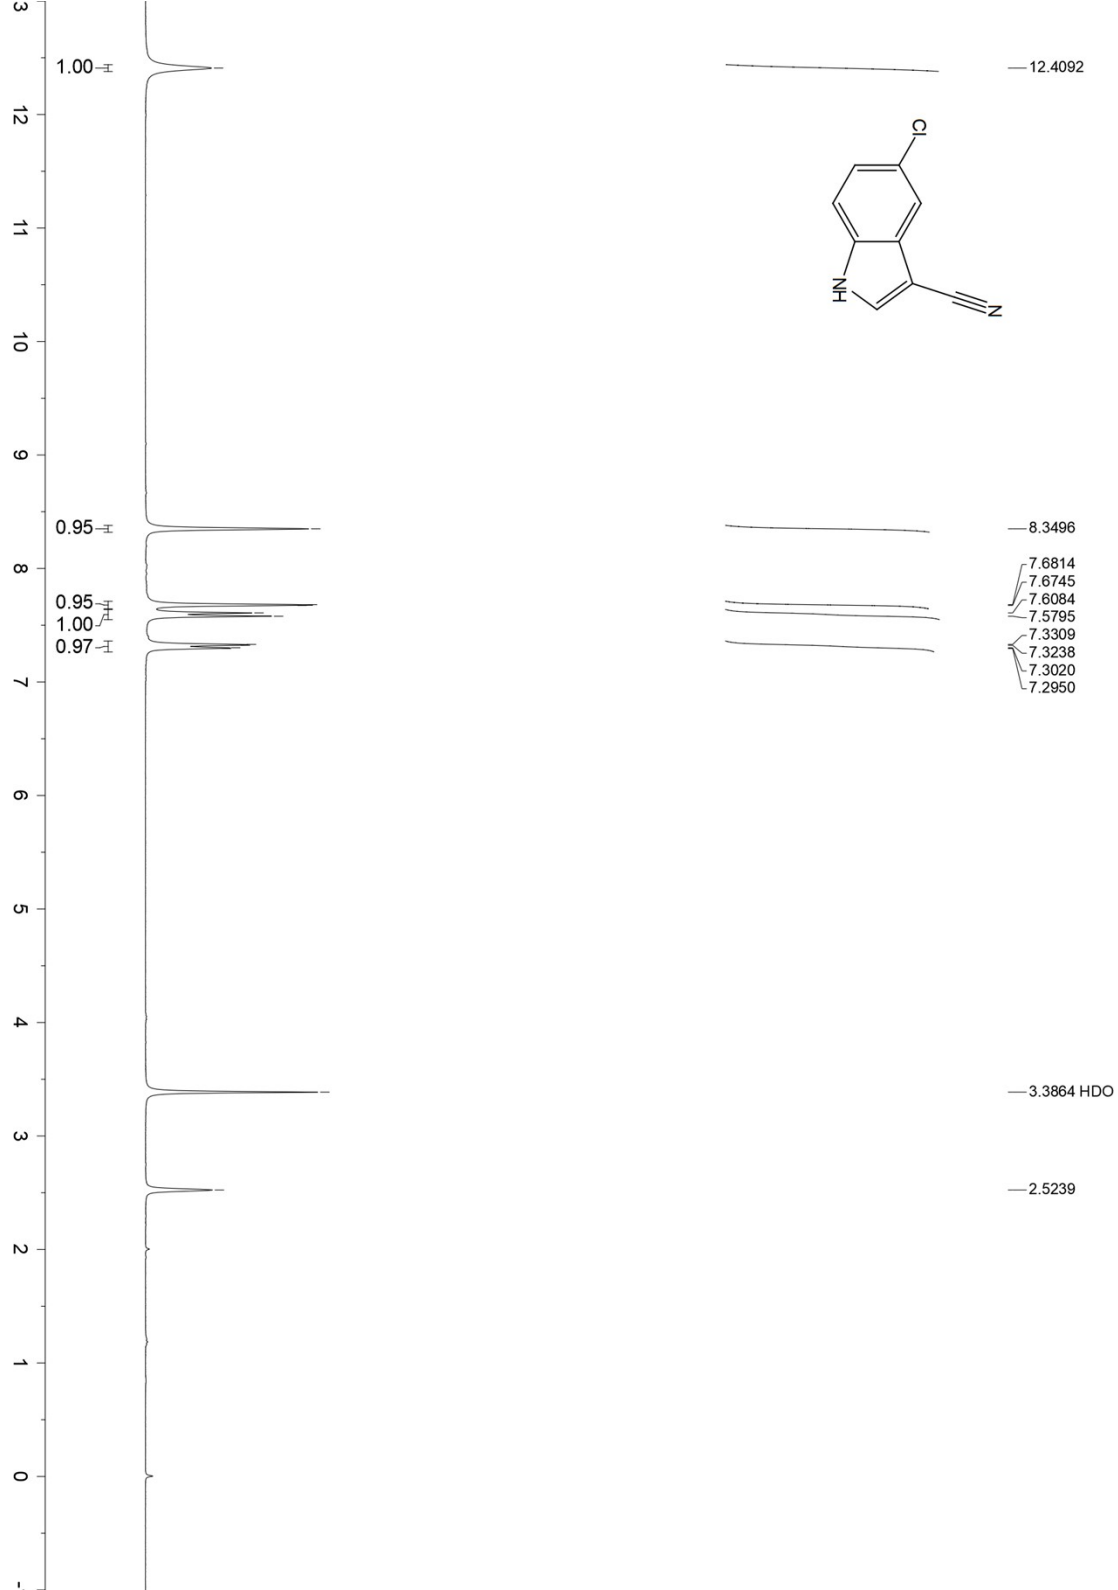

<sup>1</sup>H NMR of 2v

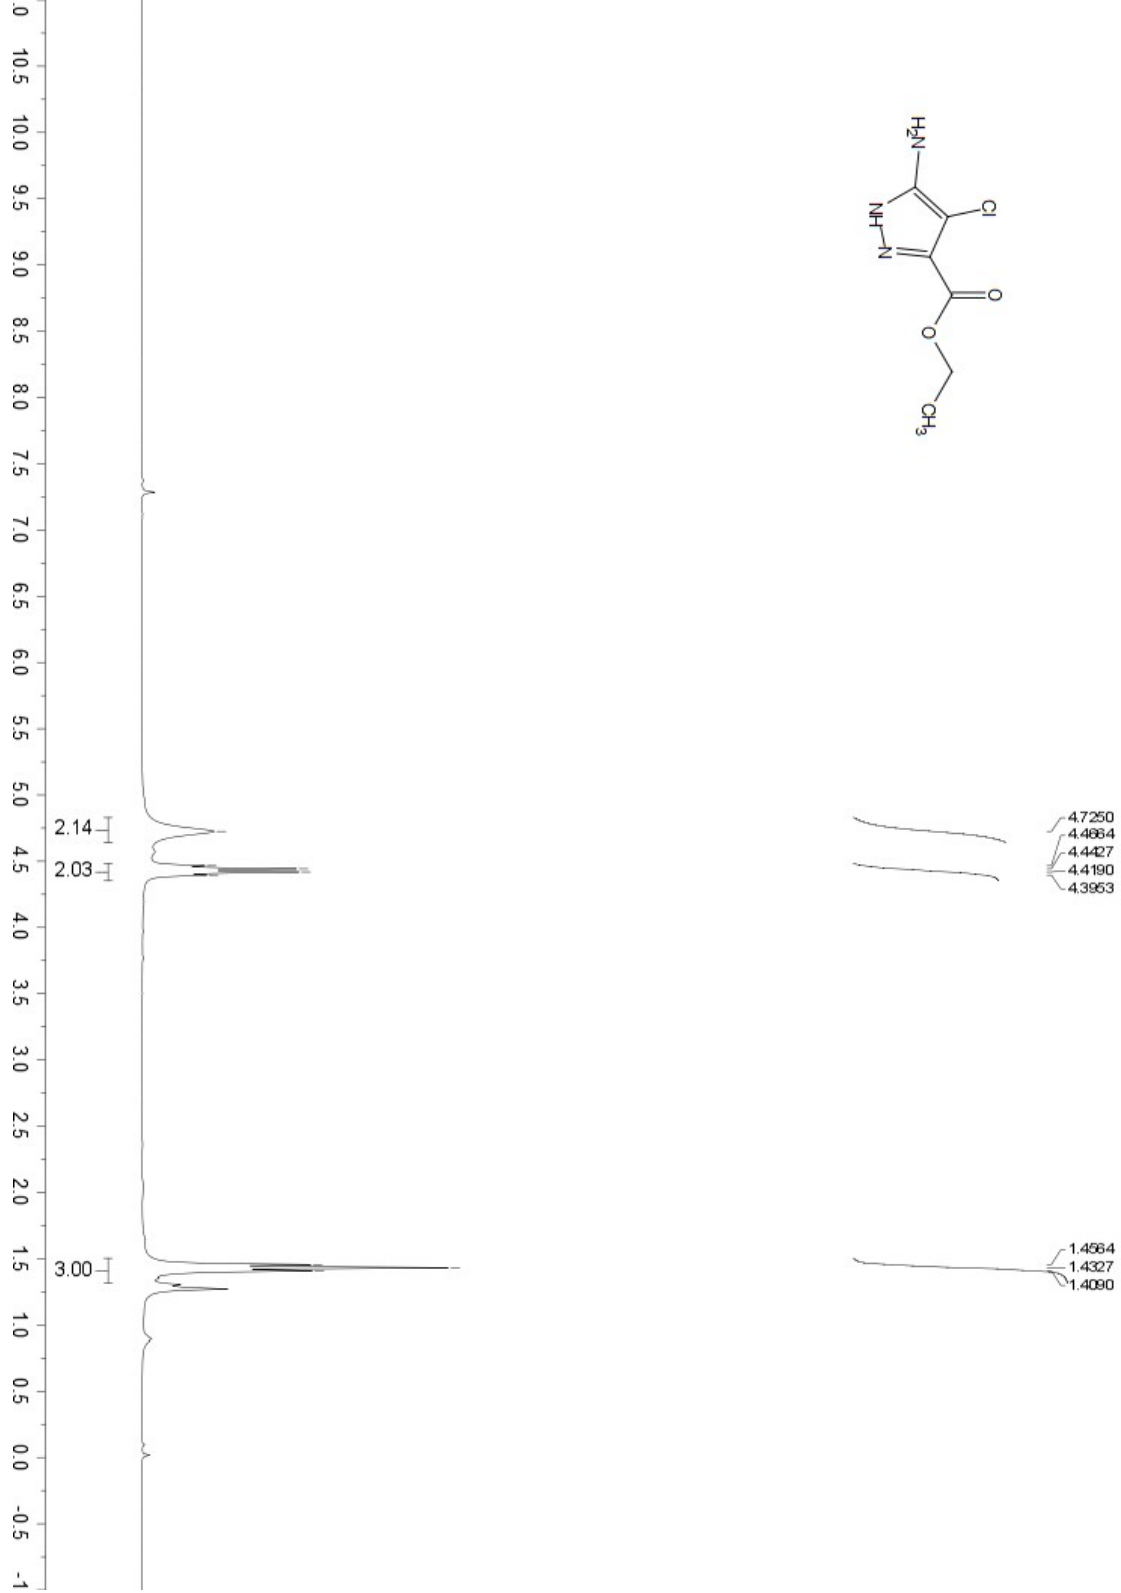

<sup>13</sup>C NMR of 2v

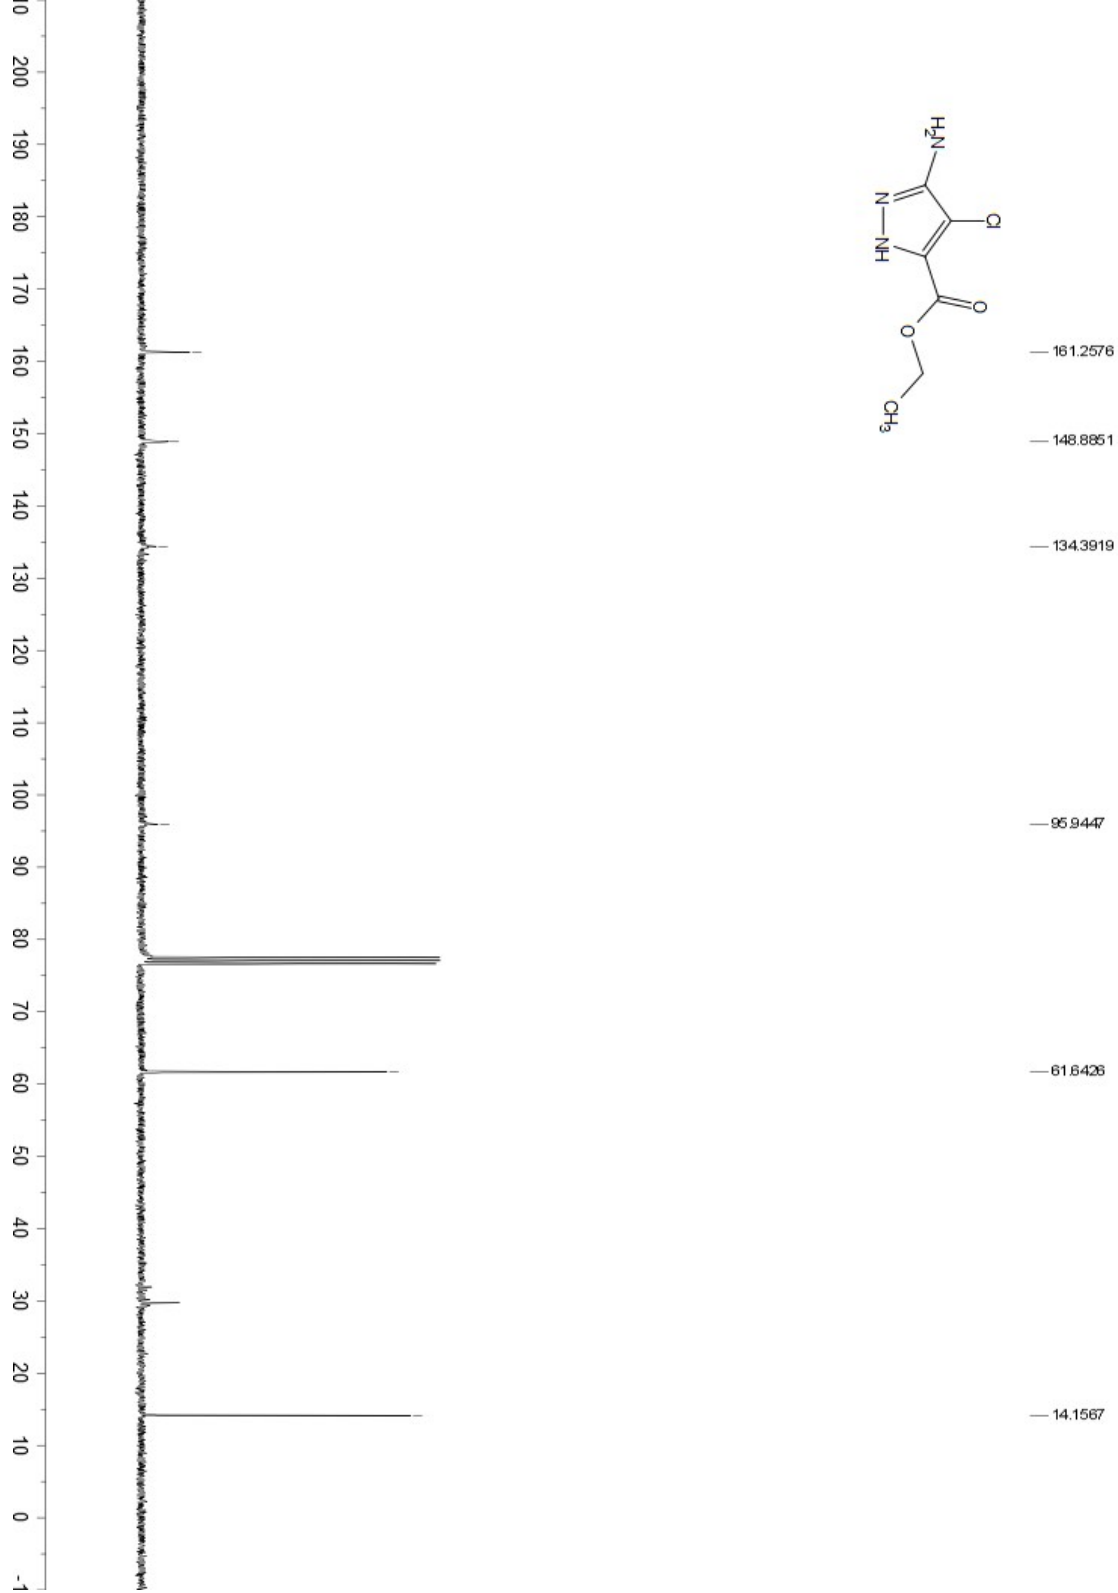

<sup>1</sup>H NMR of 2w

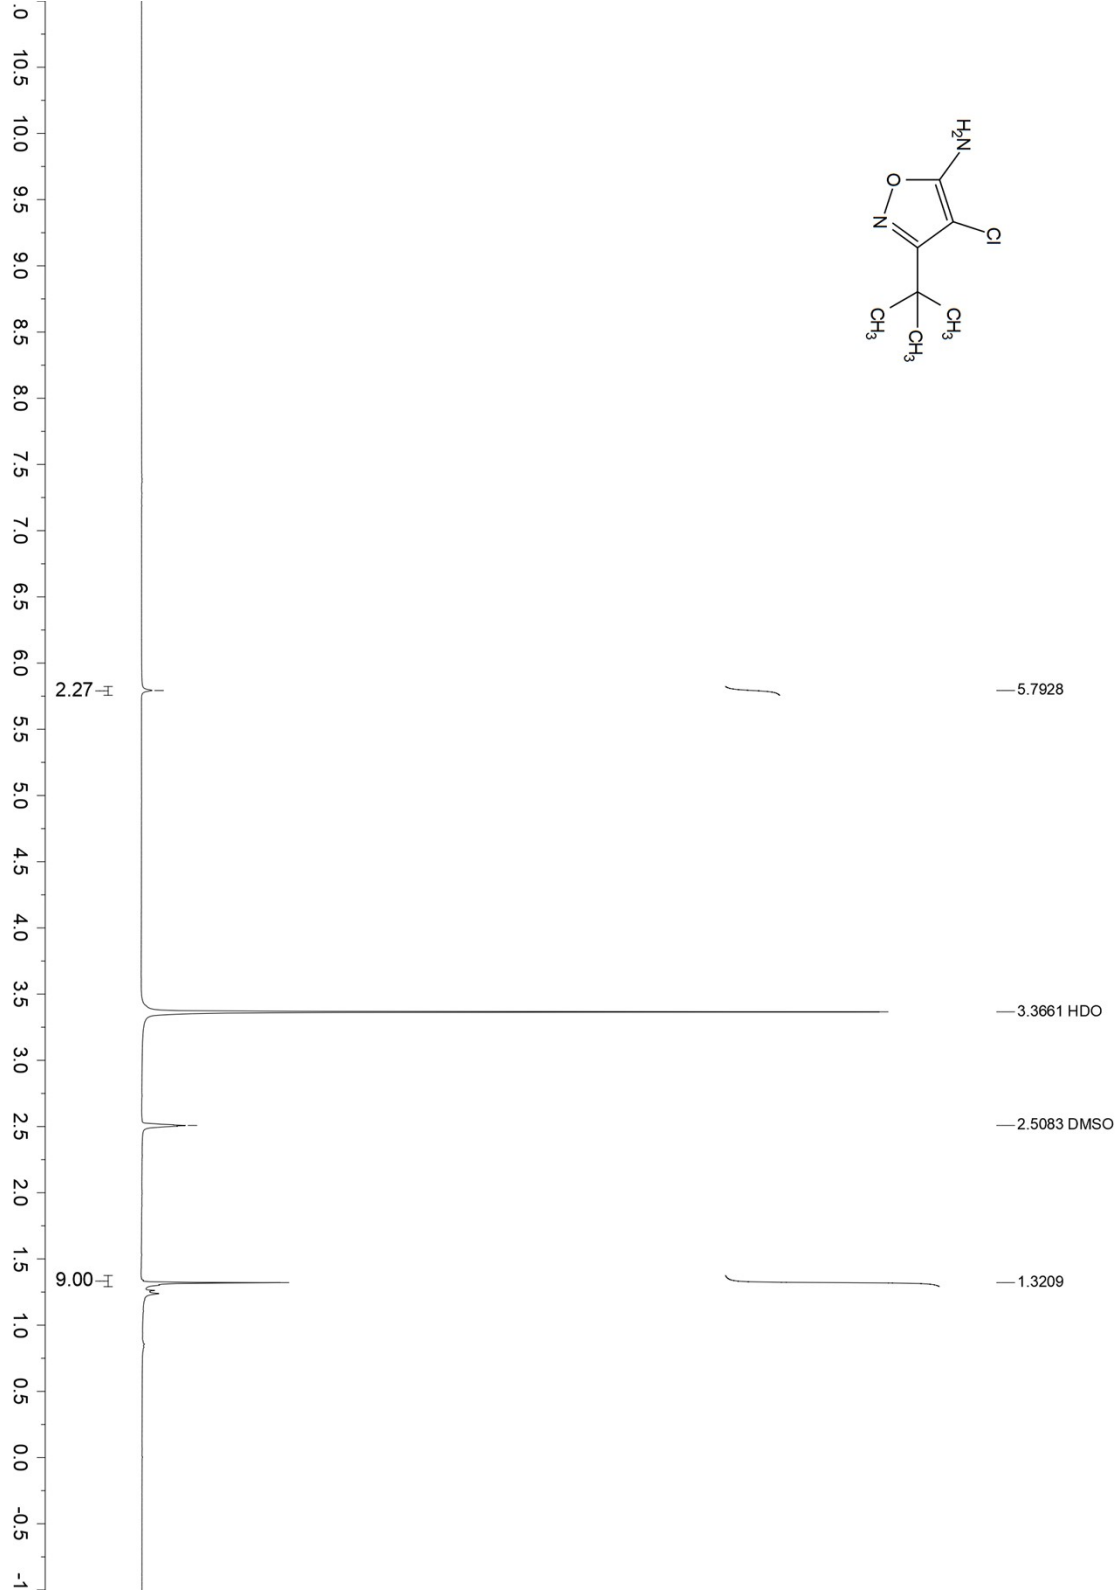

$^{13}\text{C}$  NMR of 2w

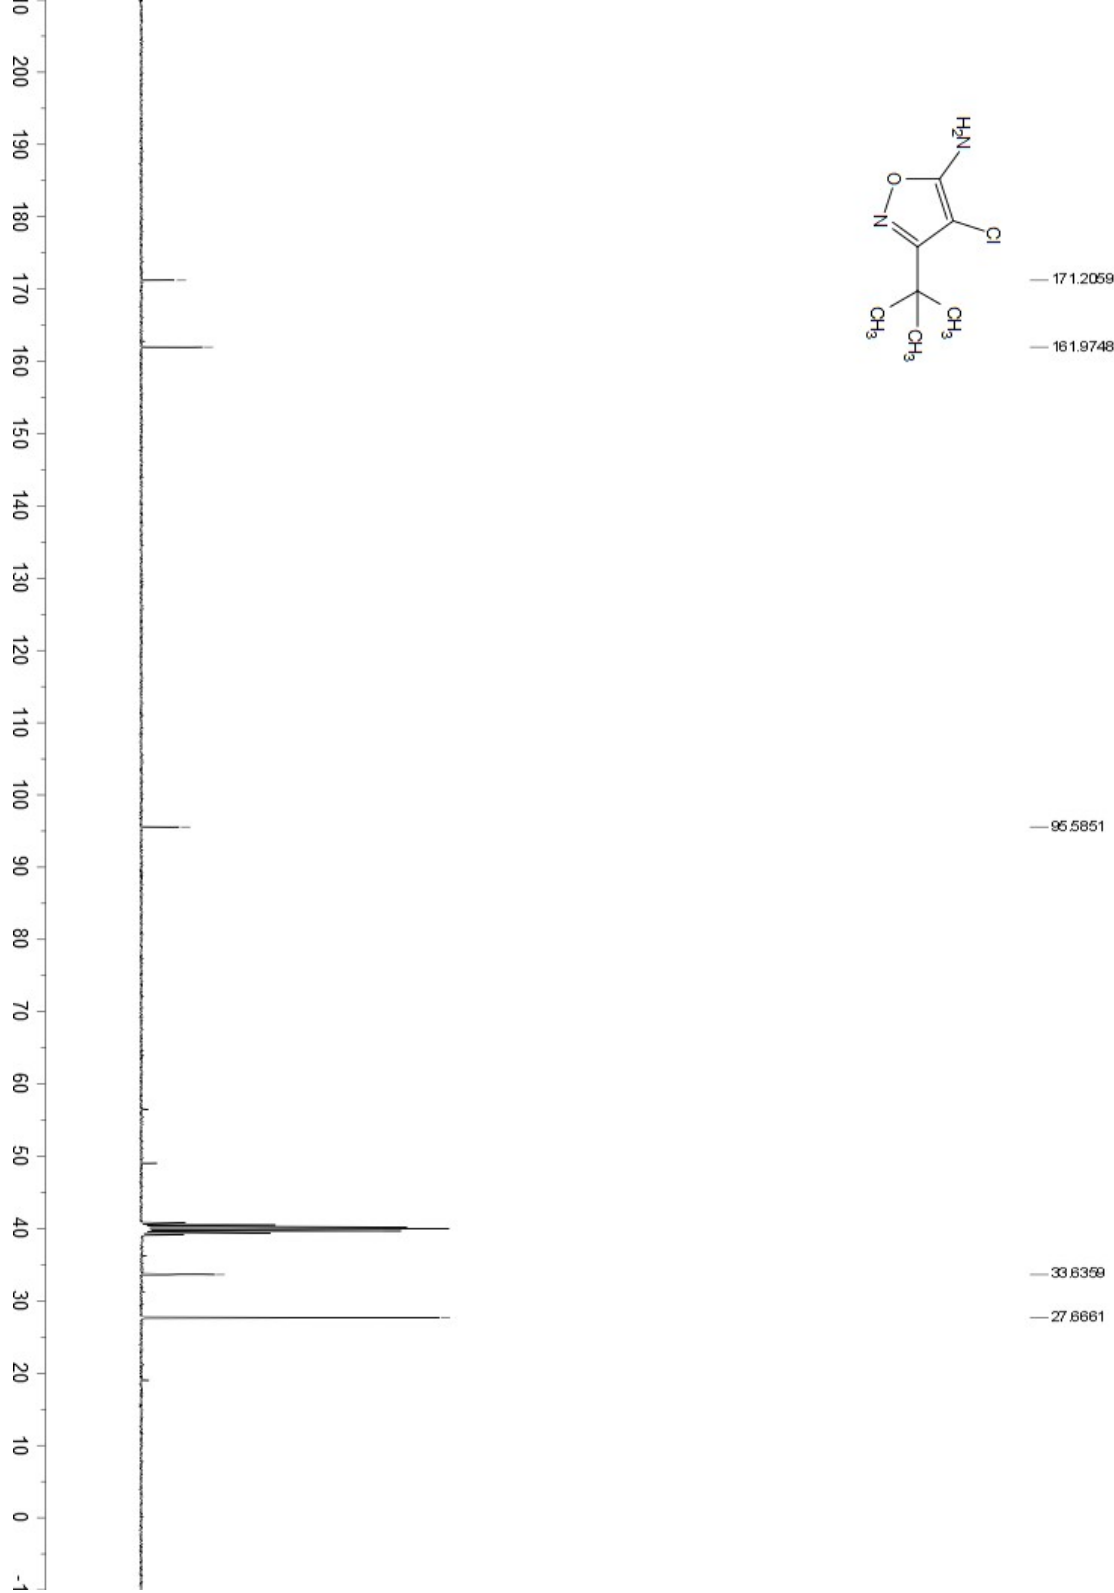

<sup>1</sup>H NMR of 2x

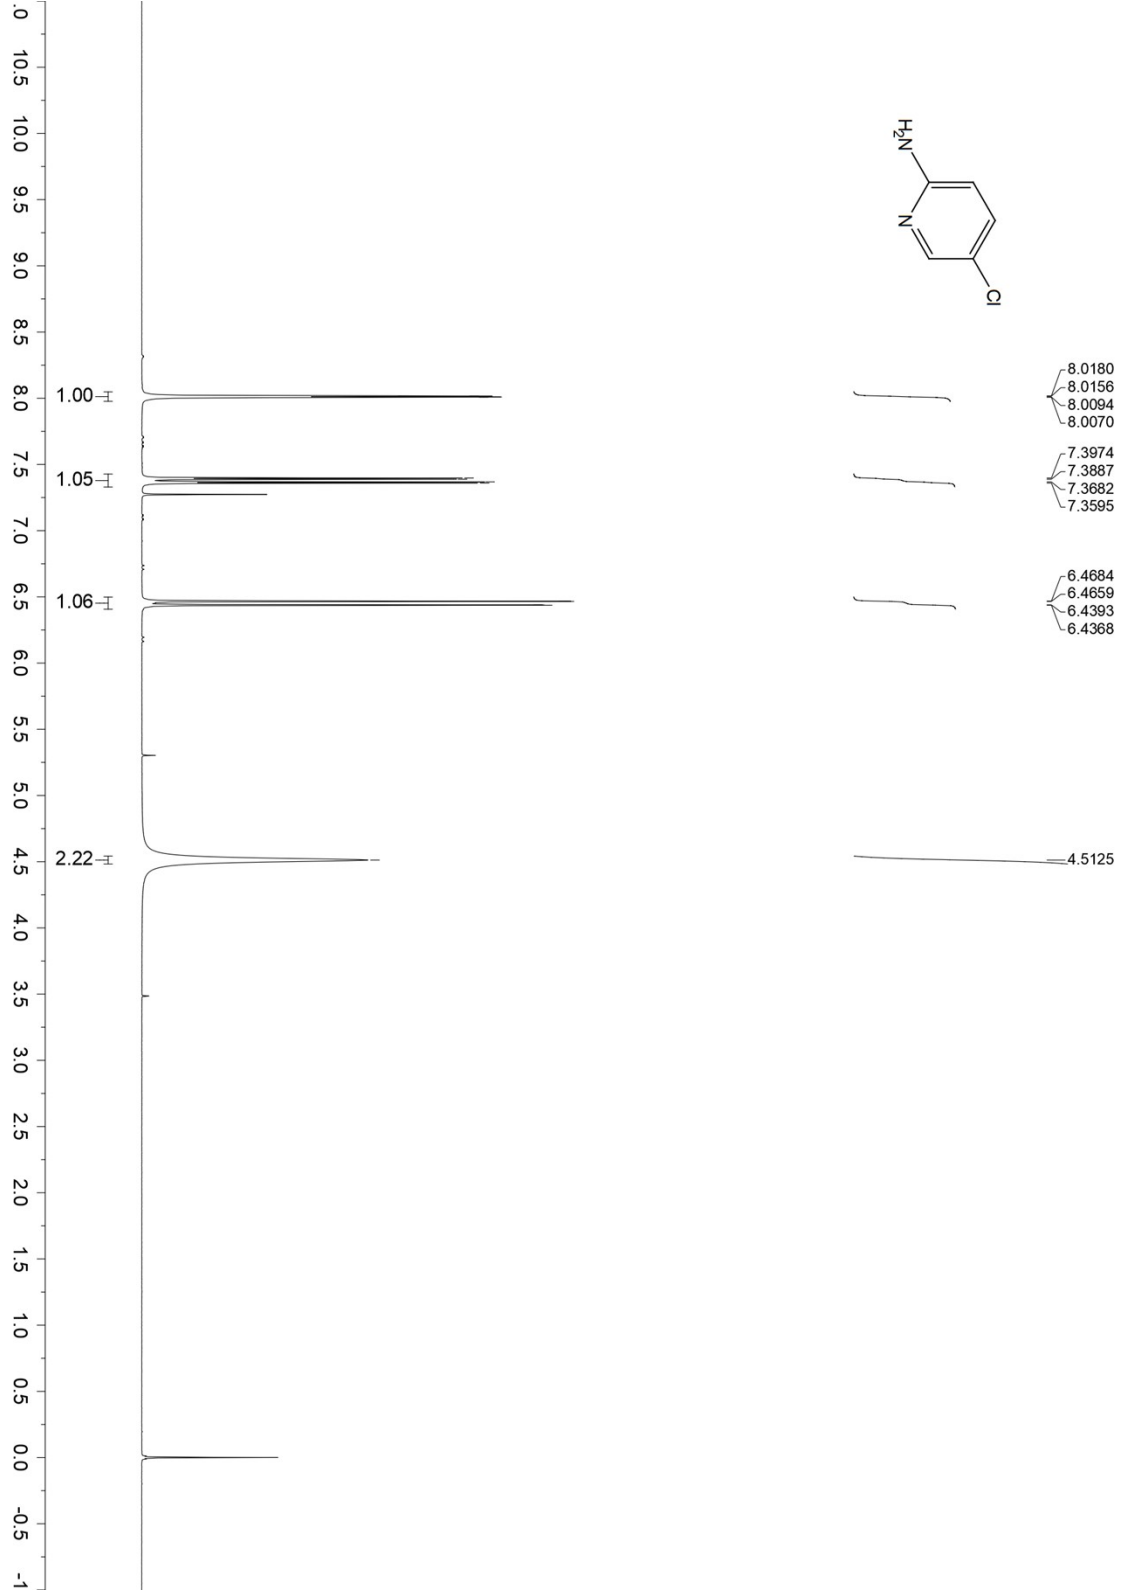

<sup>1</sup>H NMR of 2y

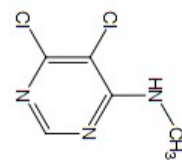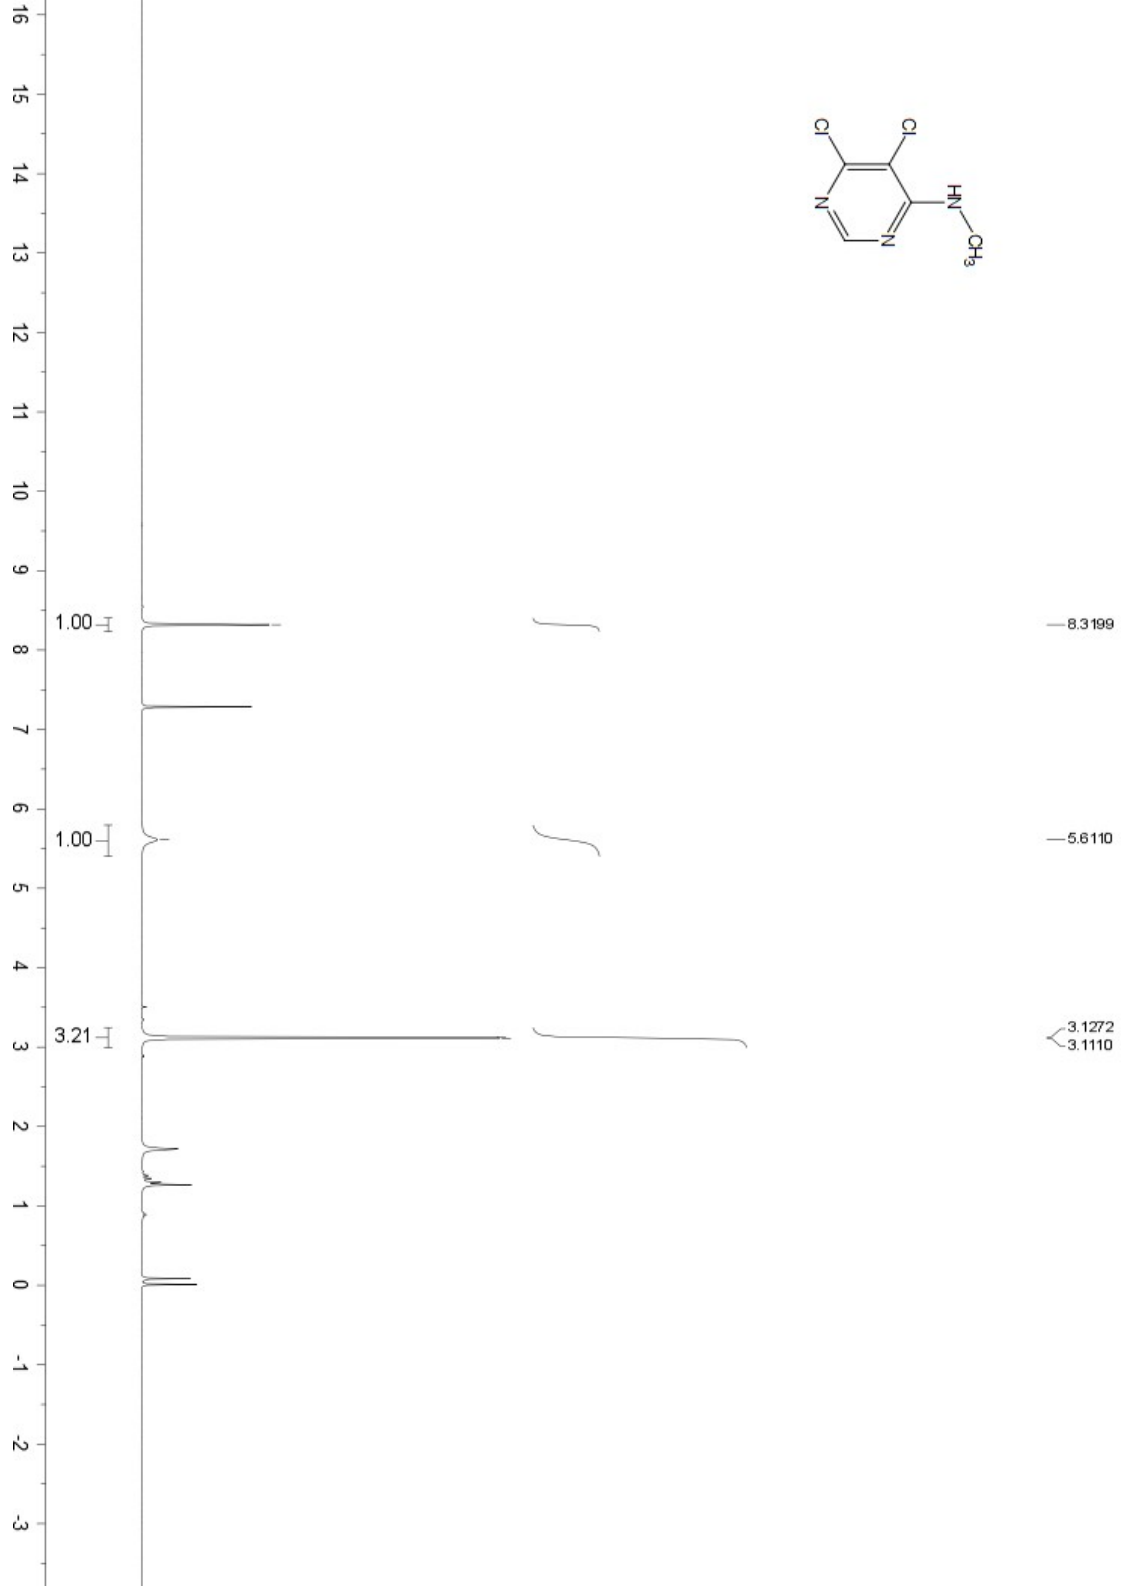

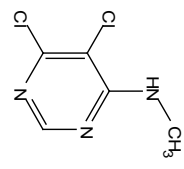

<sup>13</sup>C NMR of 2y

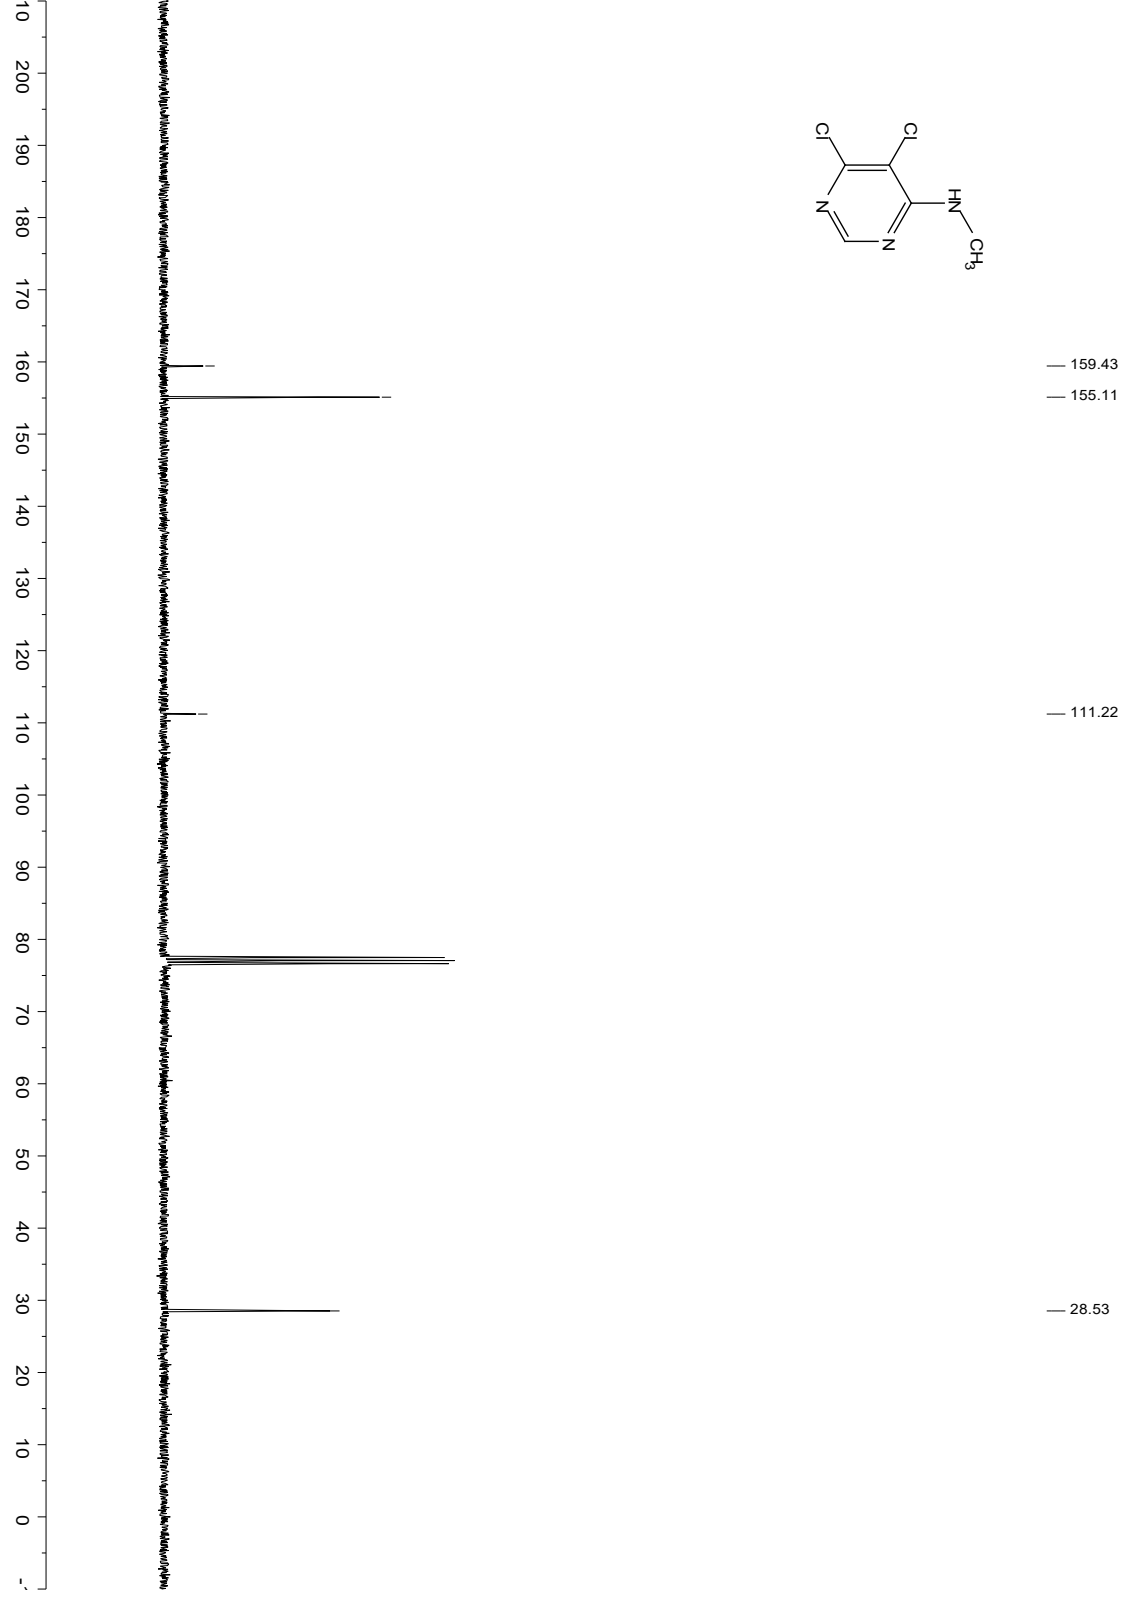



<sup>1</sup>H NMR of 2z

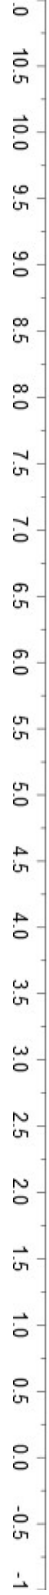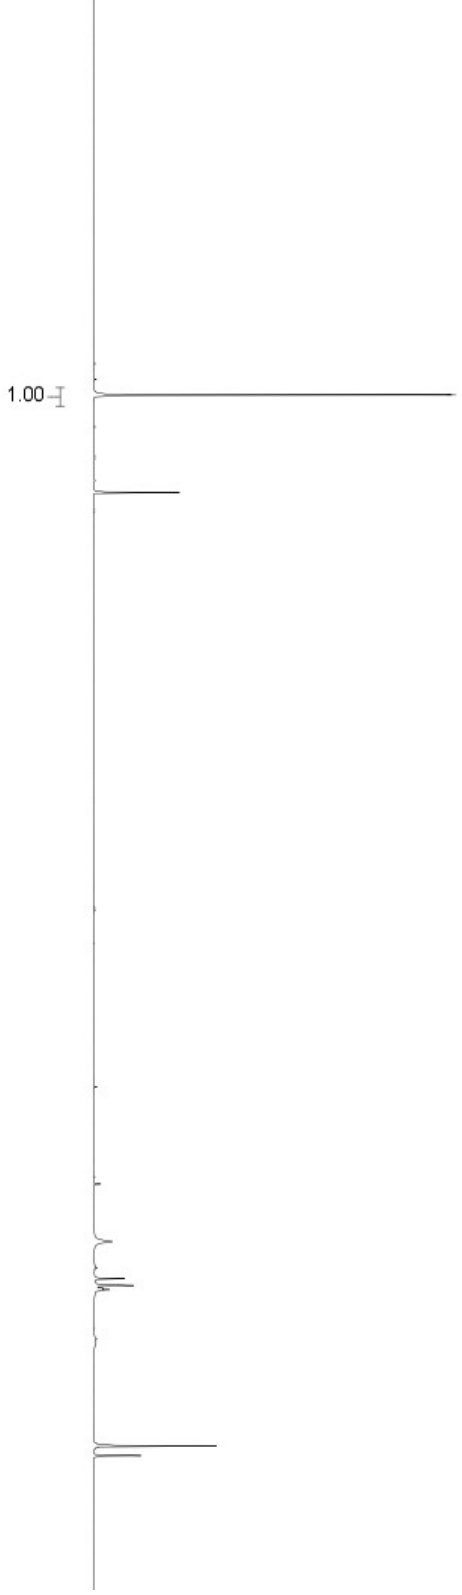

8.0188

8.0188

$^{13}\text{C}$  NMR of 2z

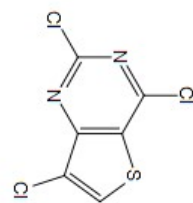

158.5894  
157.3021  
156.3663

133.0476  
128.3775  
123.0567

<sup>1</sup>H NMR of 3a

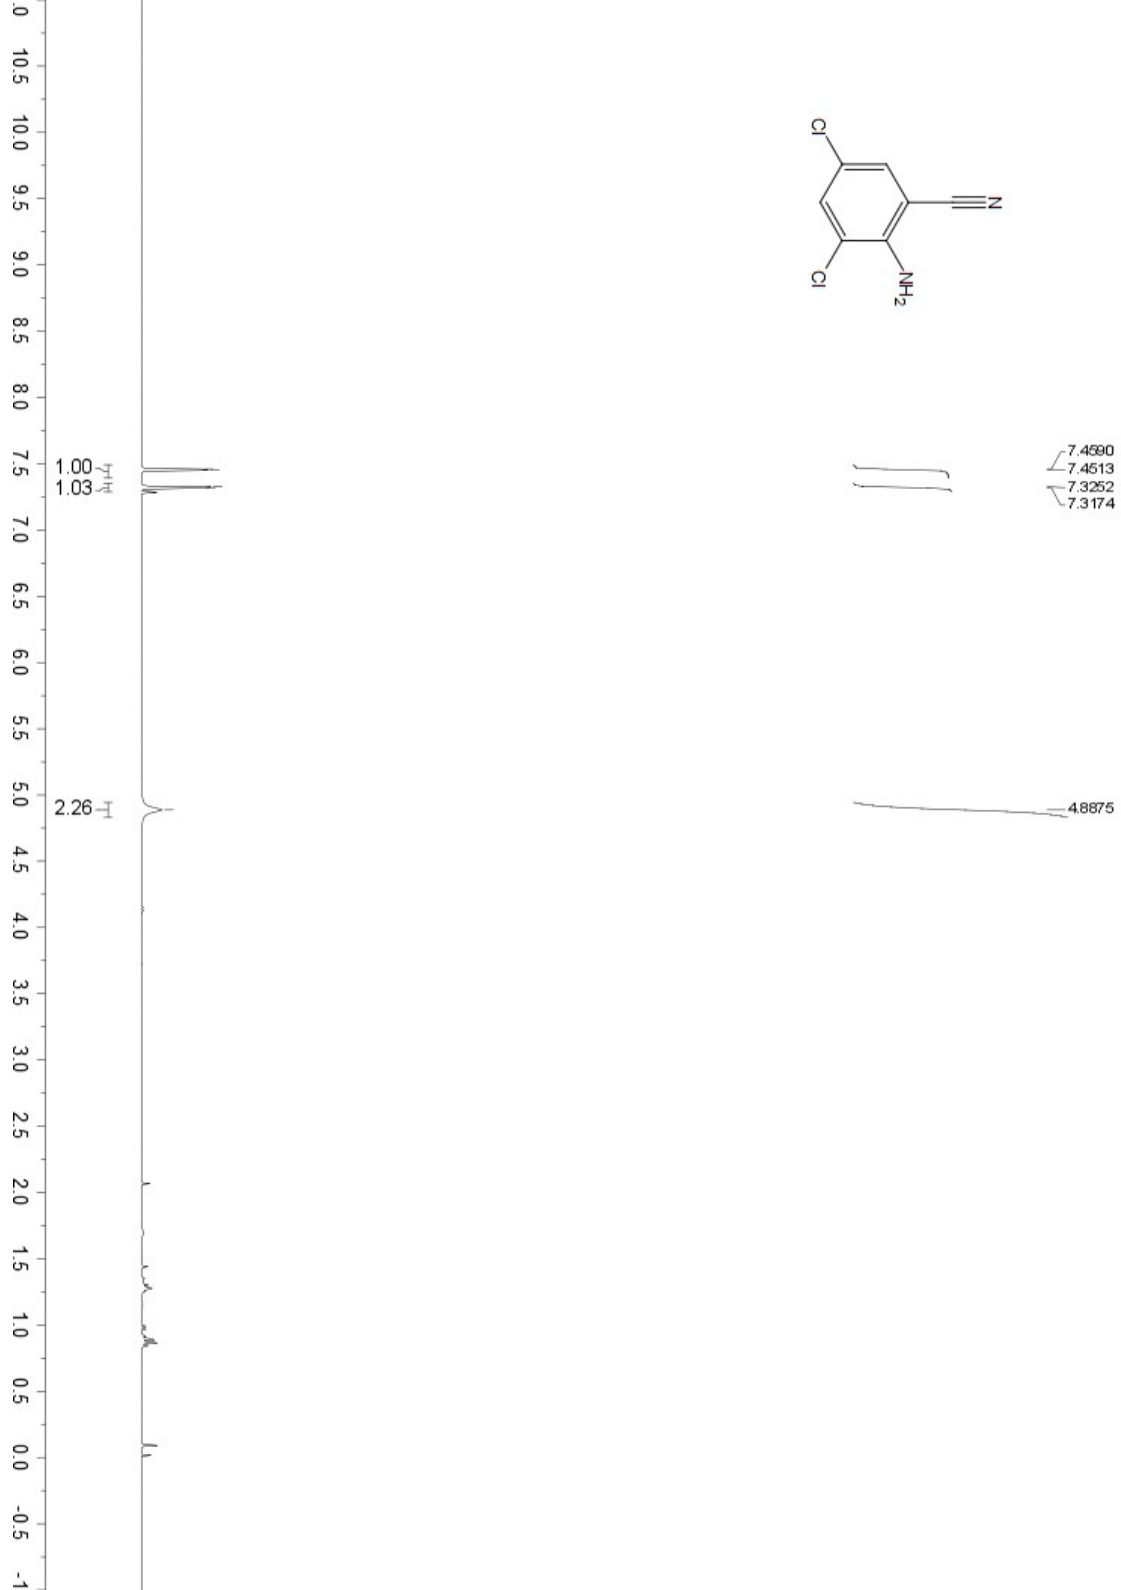

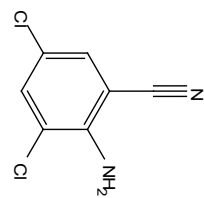

<sup>13</sup>C NMR of 3a

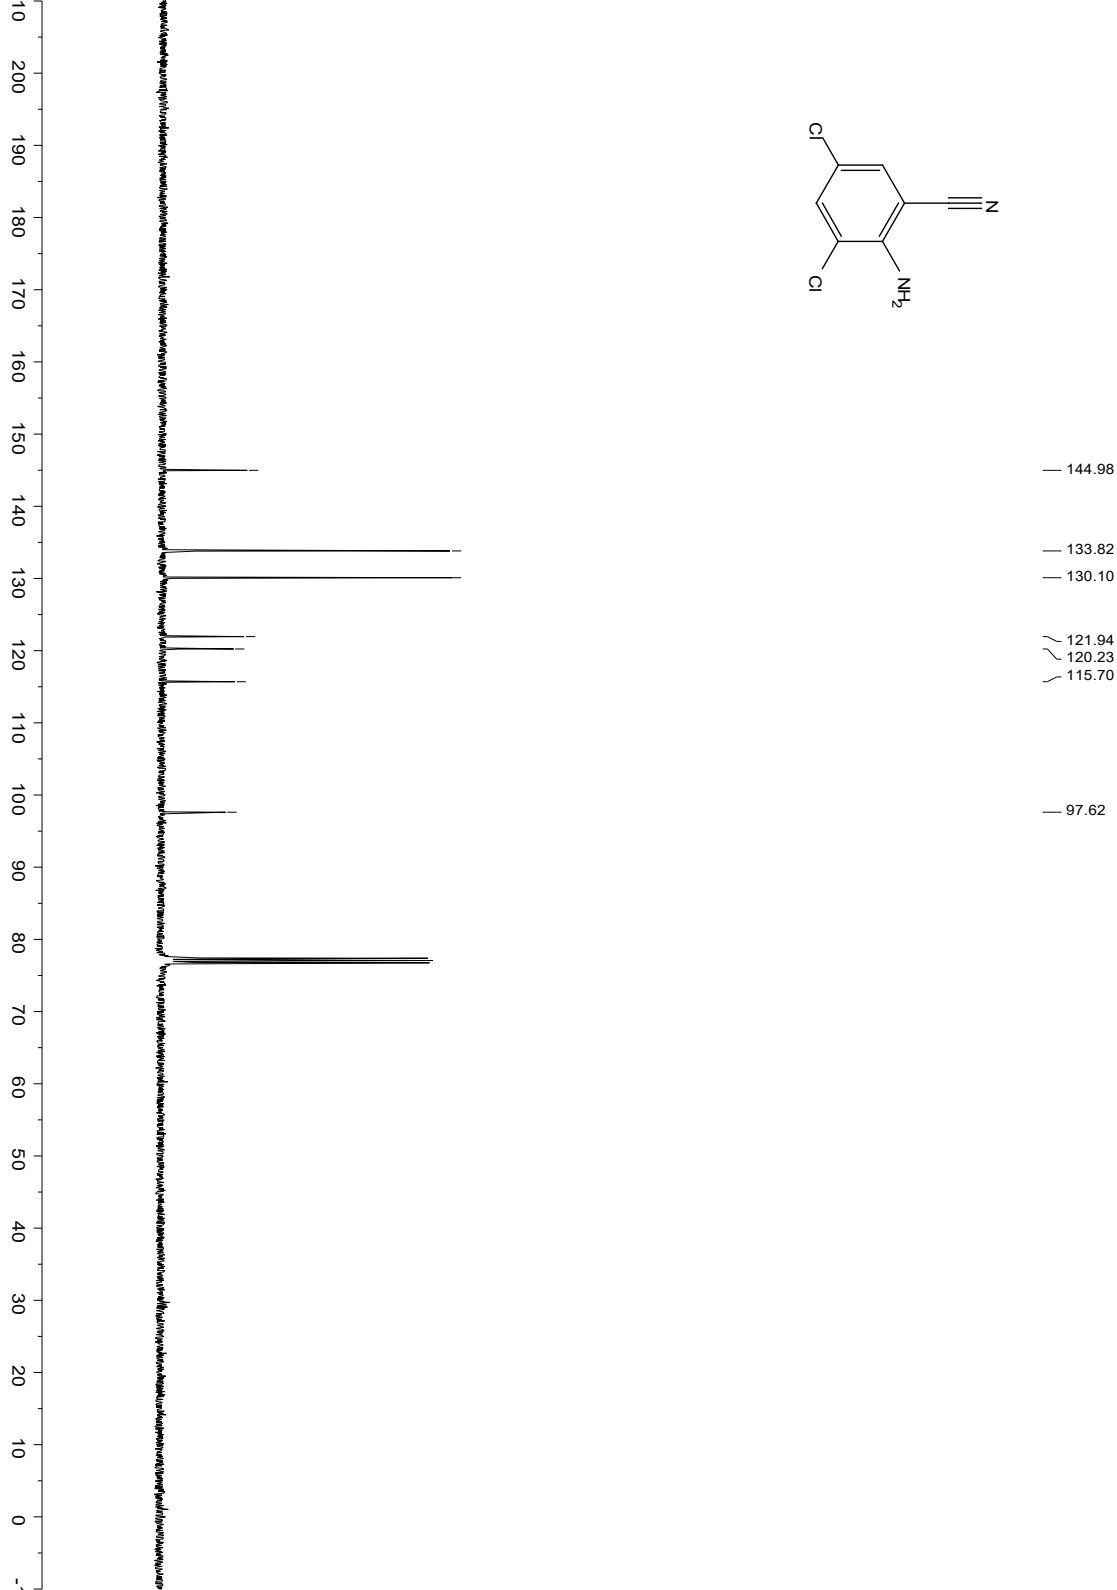

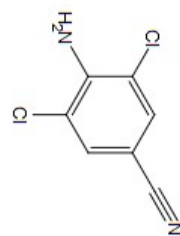

$^1\text{H}$  NMR of 3b

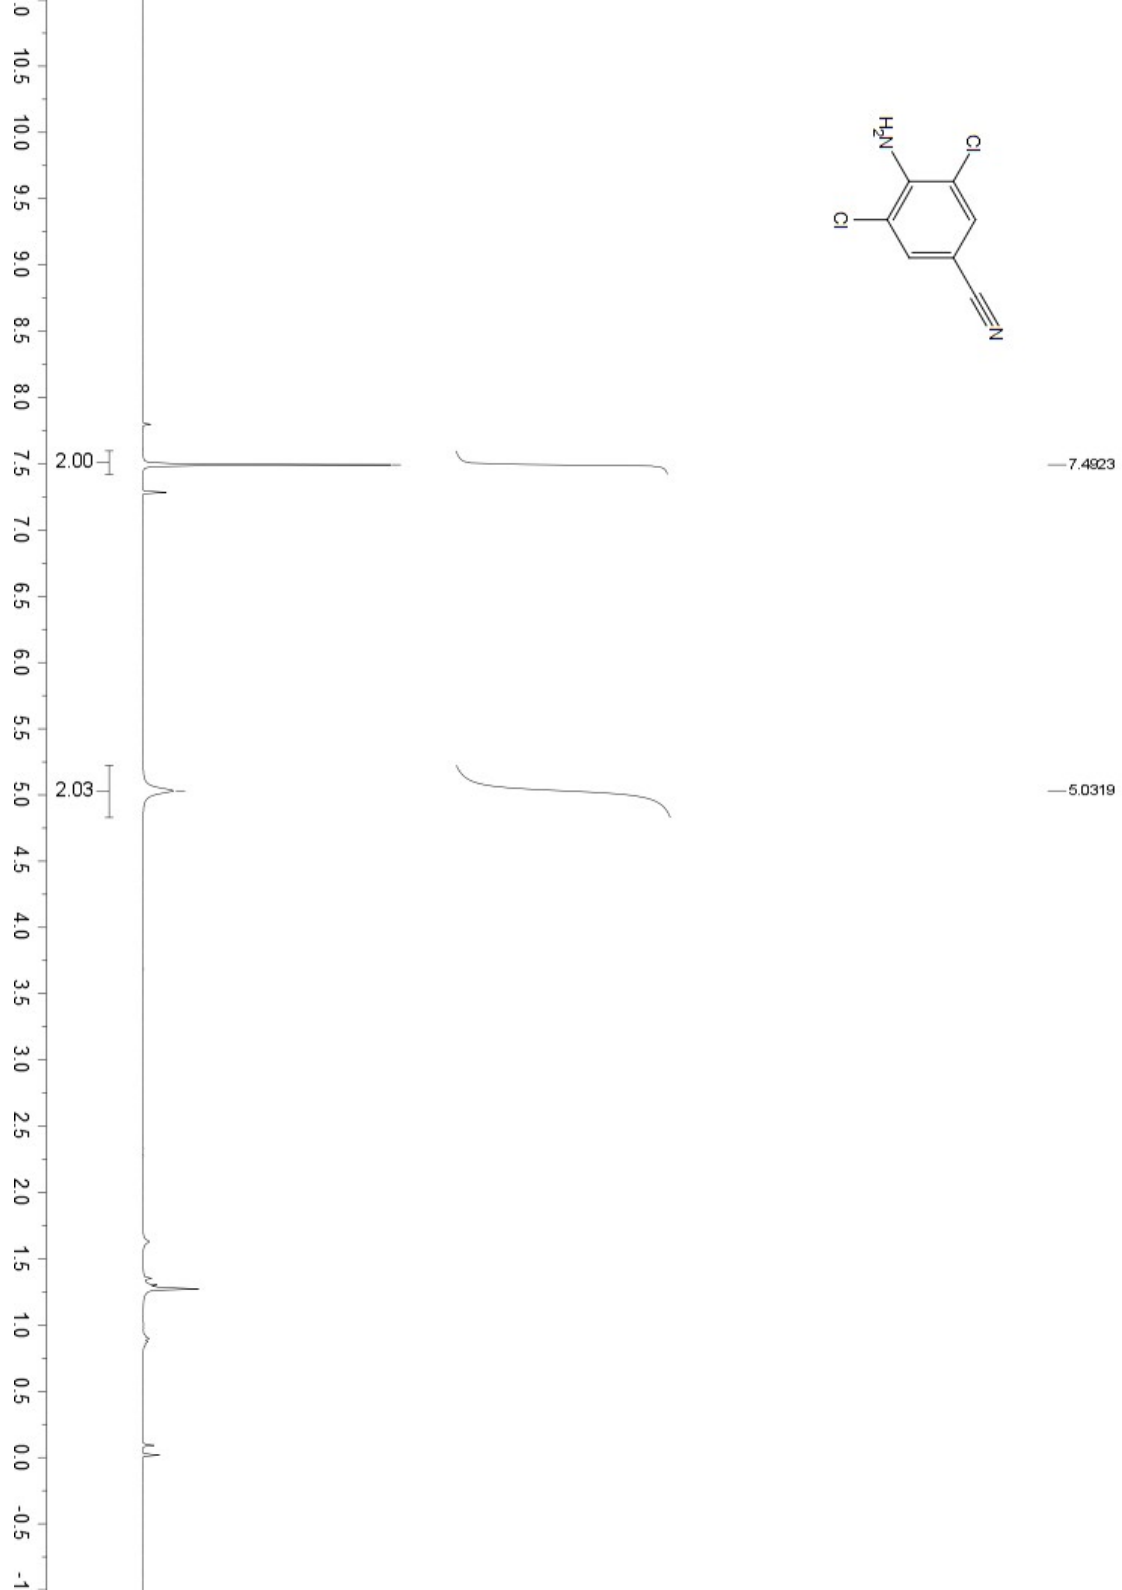

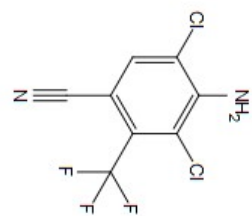

— 7.6588

— 5.3581

$^1\text{H}$  NMR of 3c

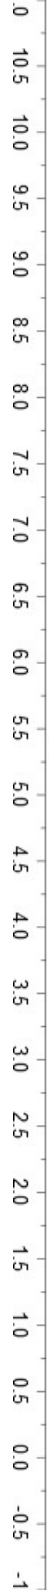

$^{13}\text{C}$  NMR of 3c

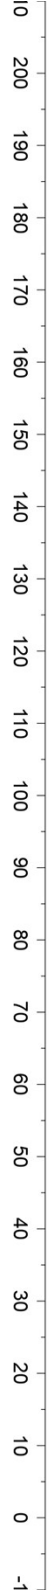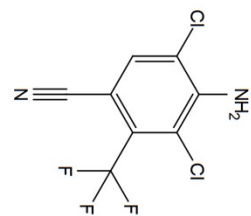

— 145.2903

— 133.4922

— 123.3783

— 121.4567

— 119.7171

— 118.0791

— 115.5211

— 98.7824

<sup>1</sup>H NMR of 3q

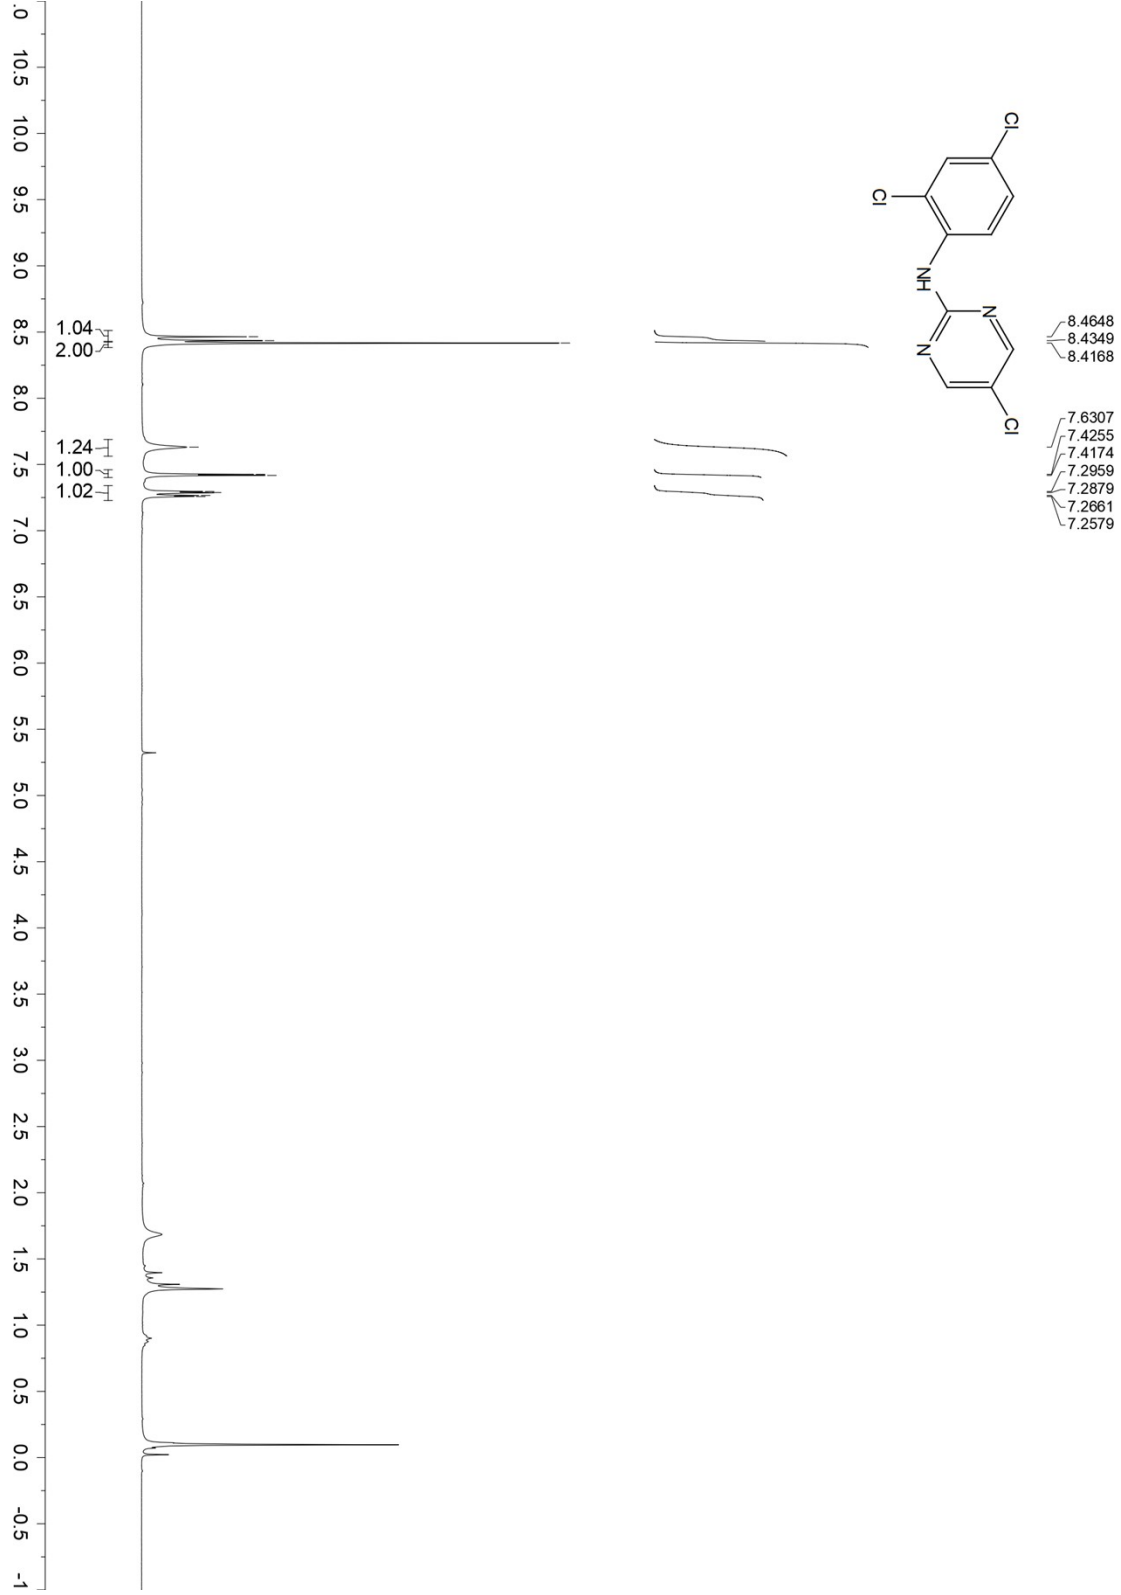



<sup>13</sup>C NMR of 3q

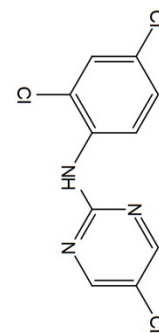

157.5266  
156.2798

134.4601  
128.8495  
127.6076  
127.4020  
123.0637  
122.1278  
120.8819

<sup>1</sup>H NMR of 4a

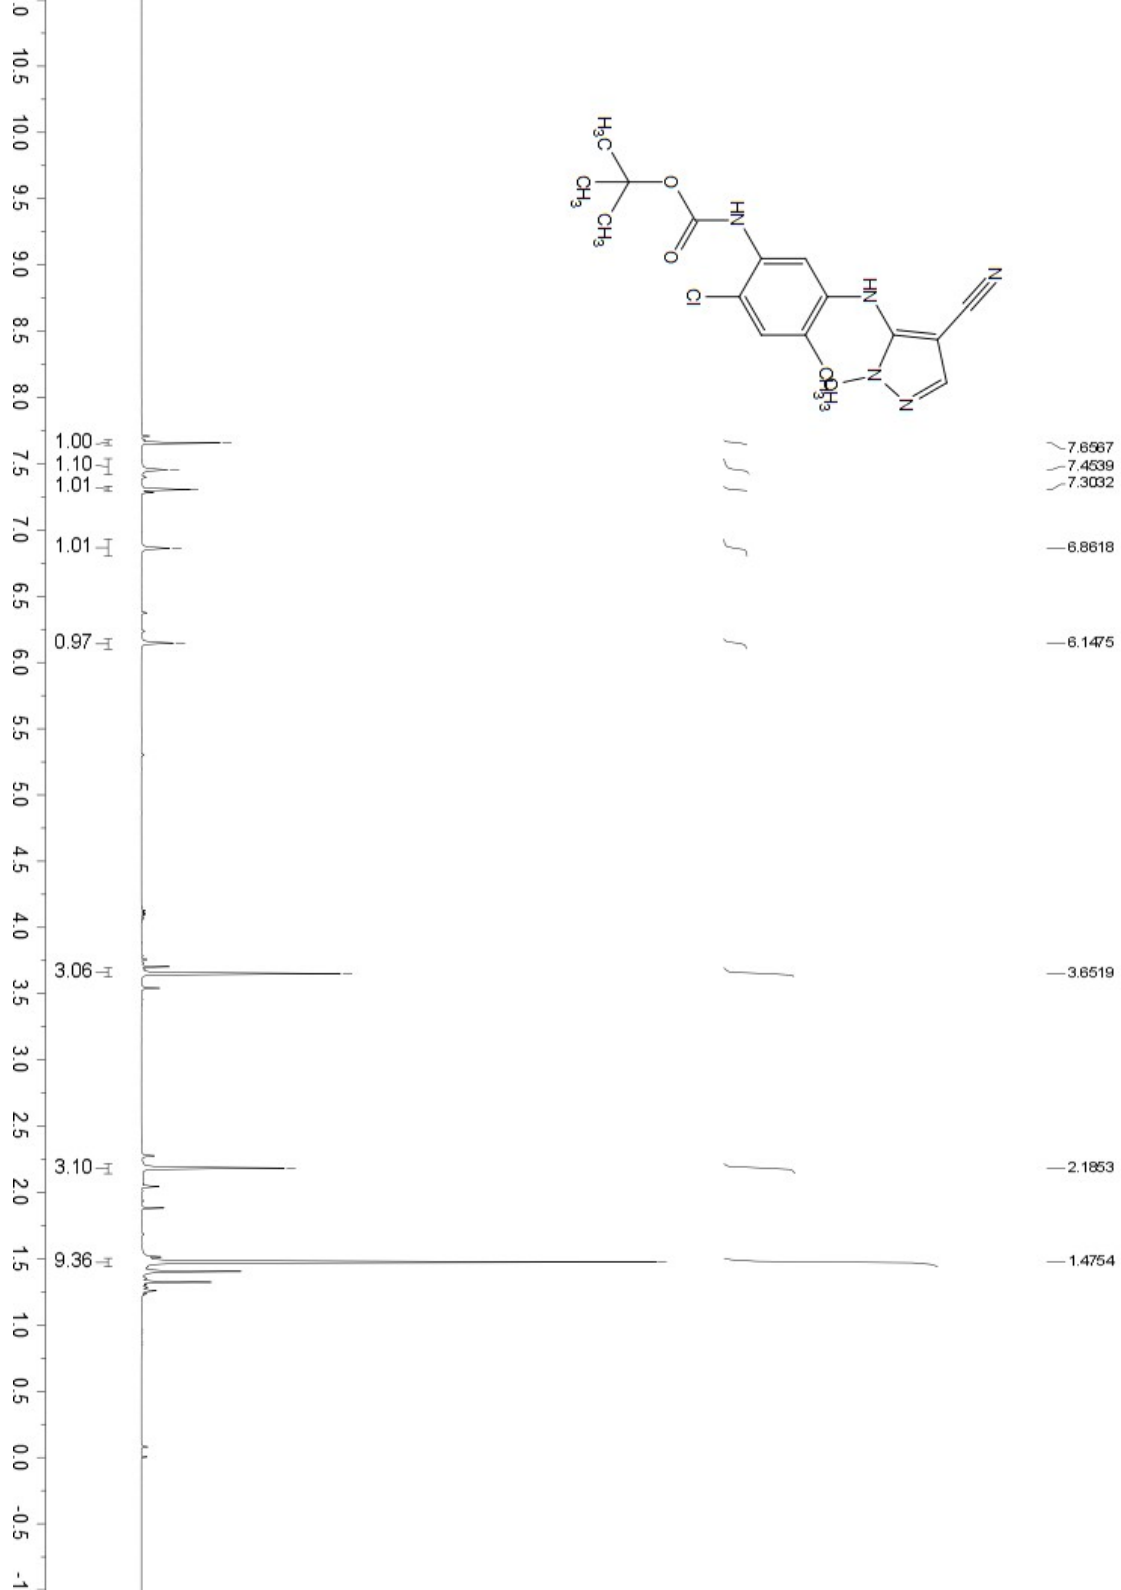

$^{13}\text{C}$  NMR of 4a

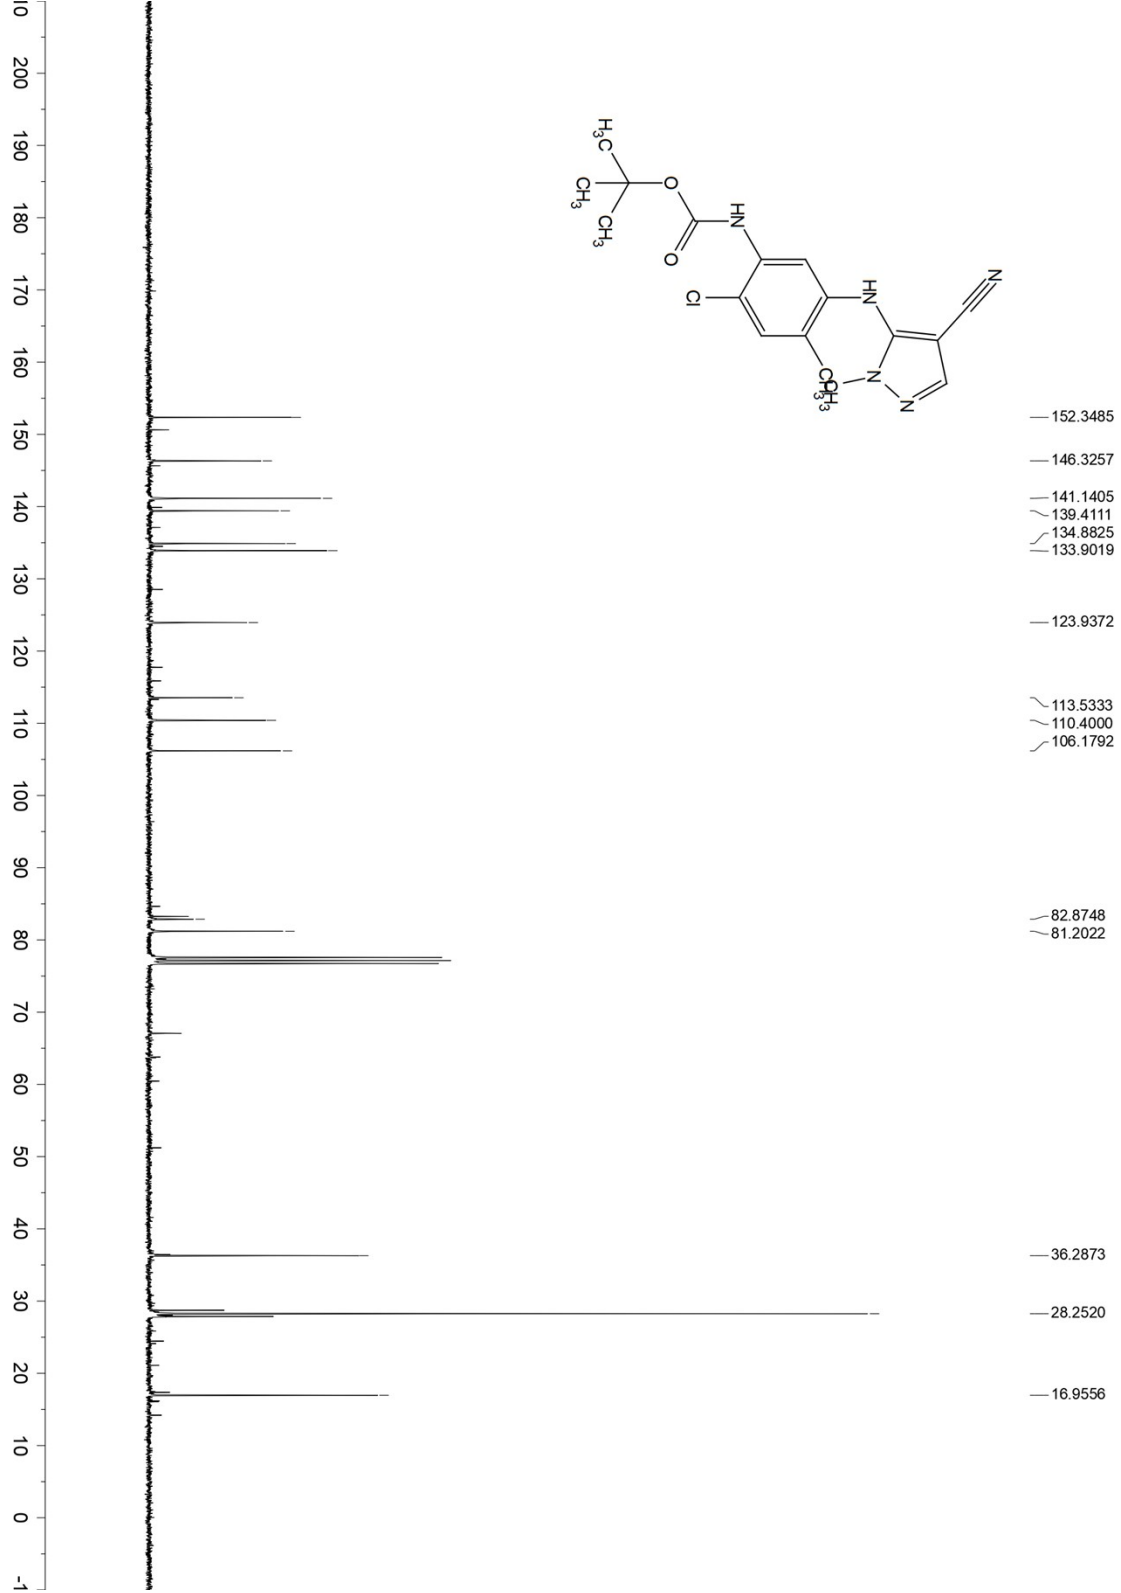

<sup>1</sup>H NMR of 4b

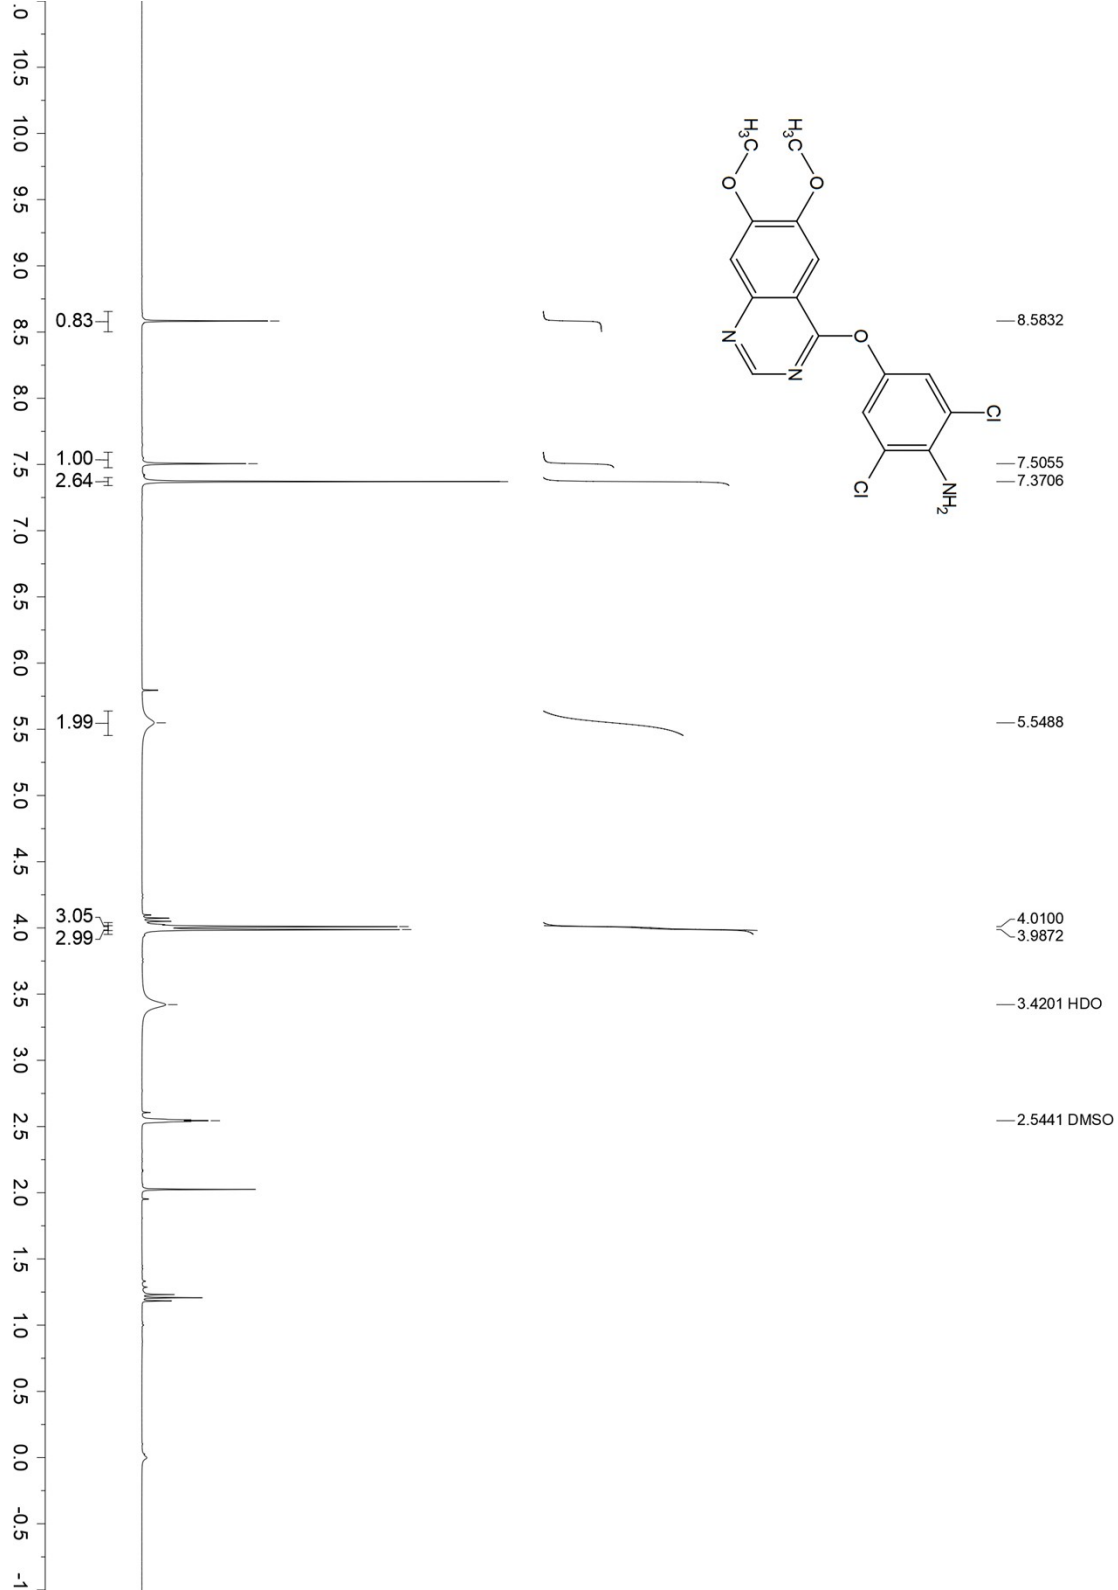

<sup>13</sup>C NMR of 4b

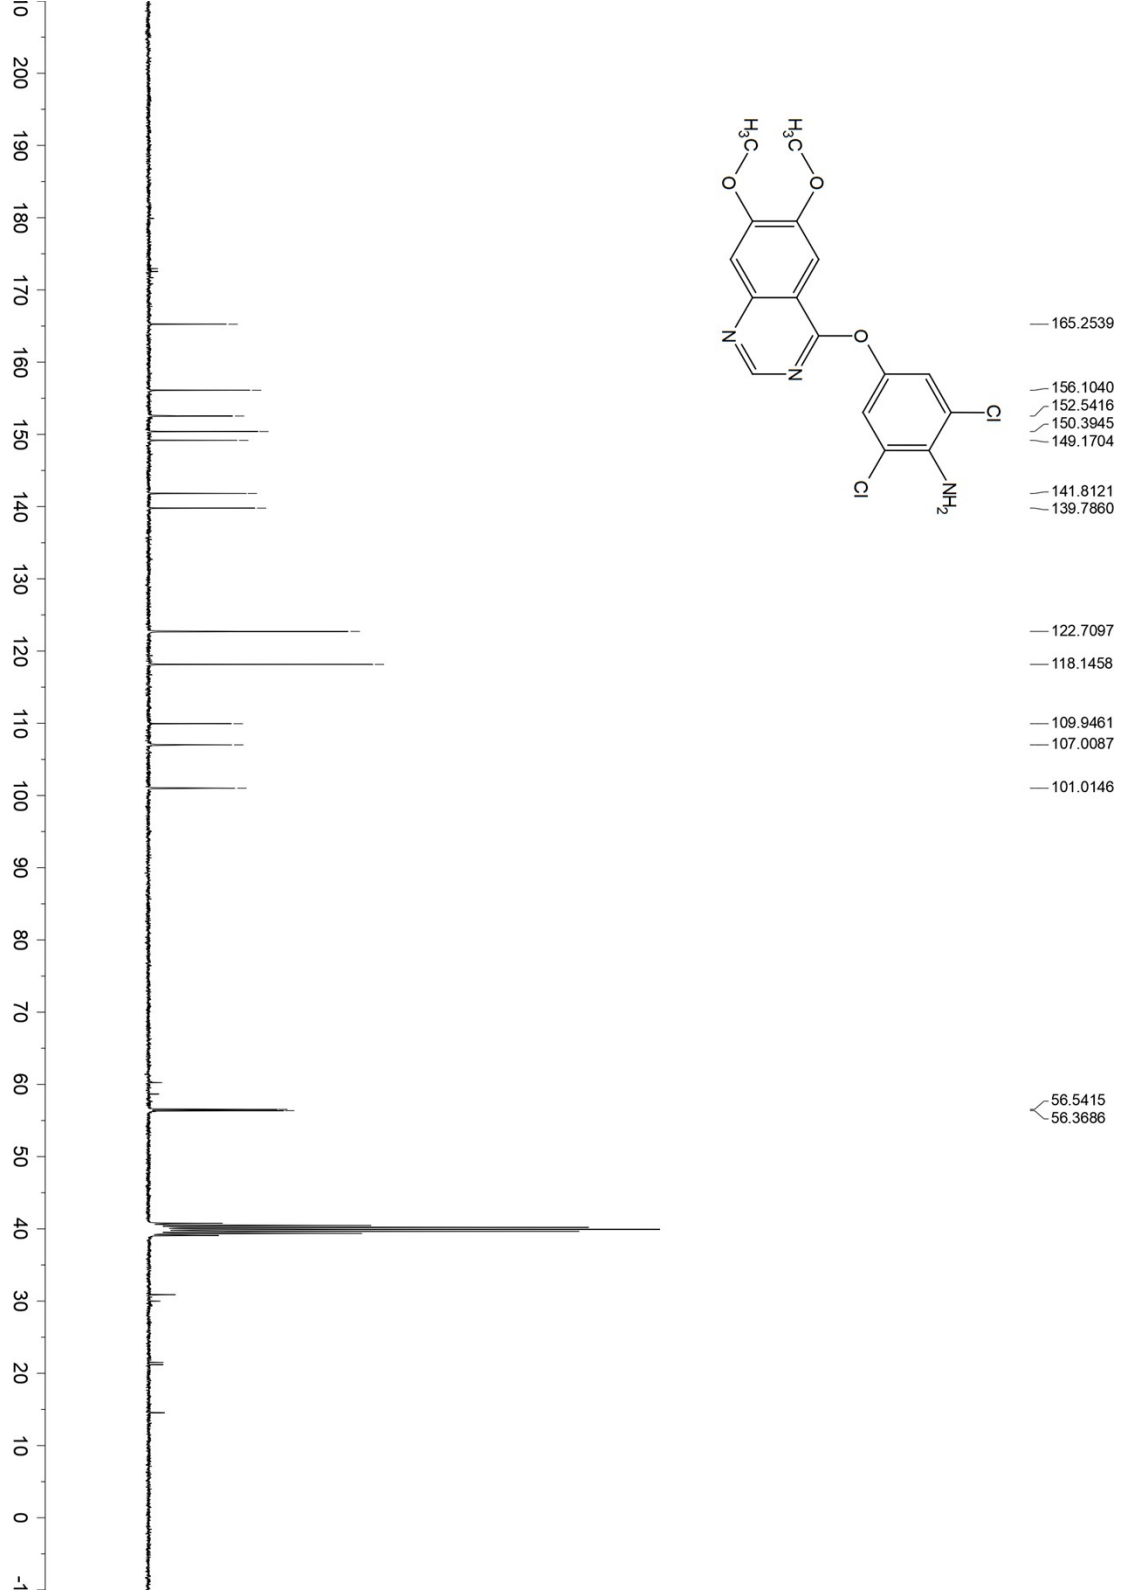



<sup>13</sup>C NMR of 4c

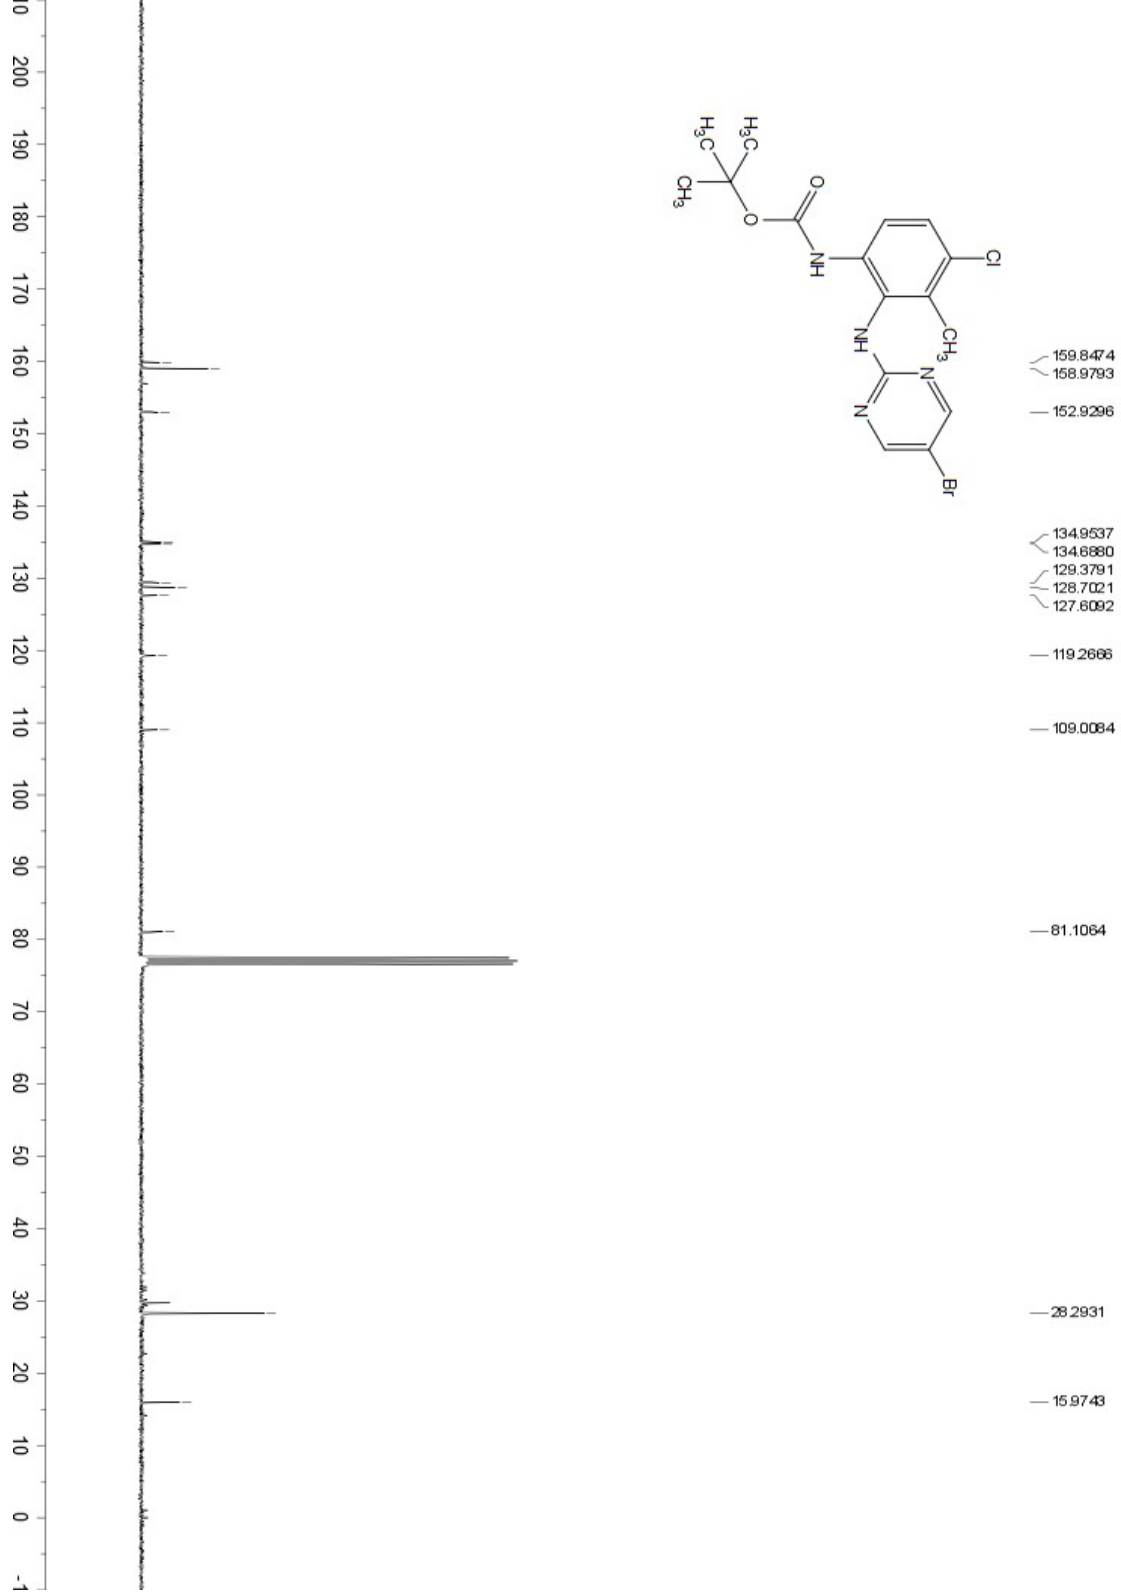

<sup>1</sup>H NMR of 4d

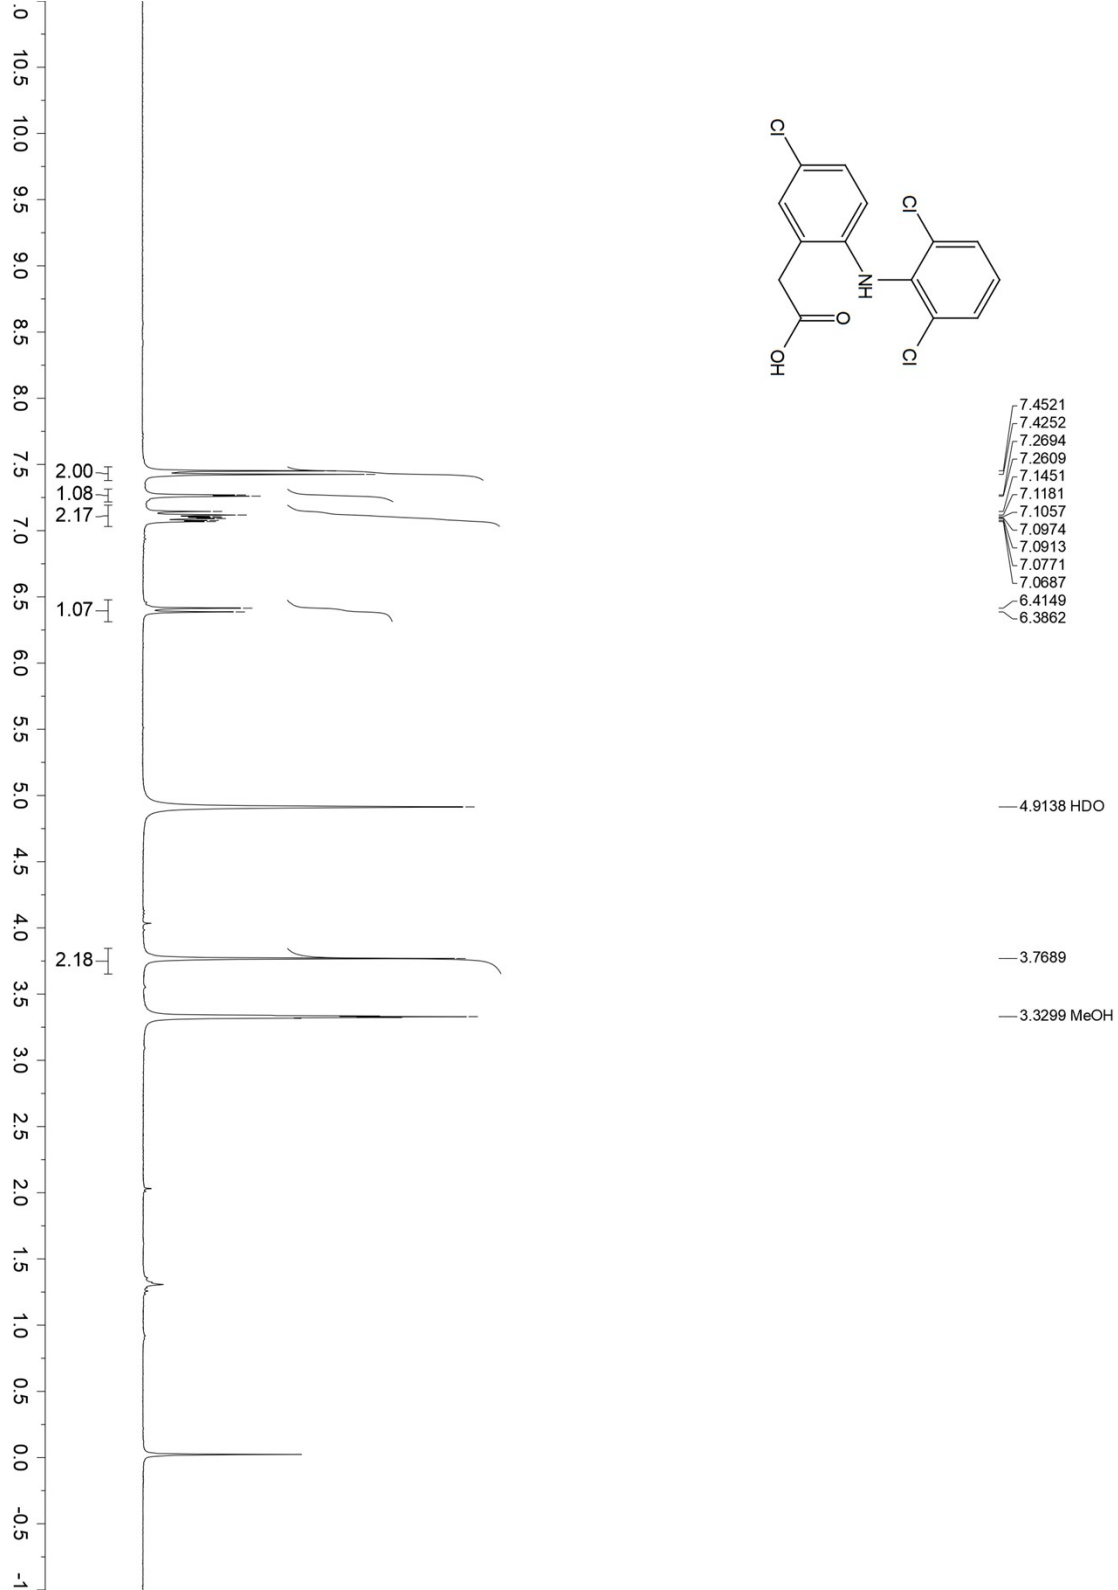



<sup>1</sup>H NMR of 4e

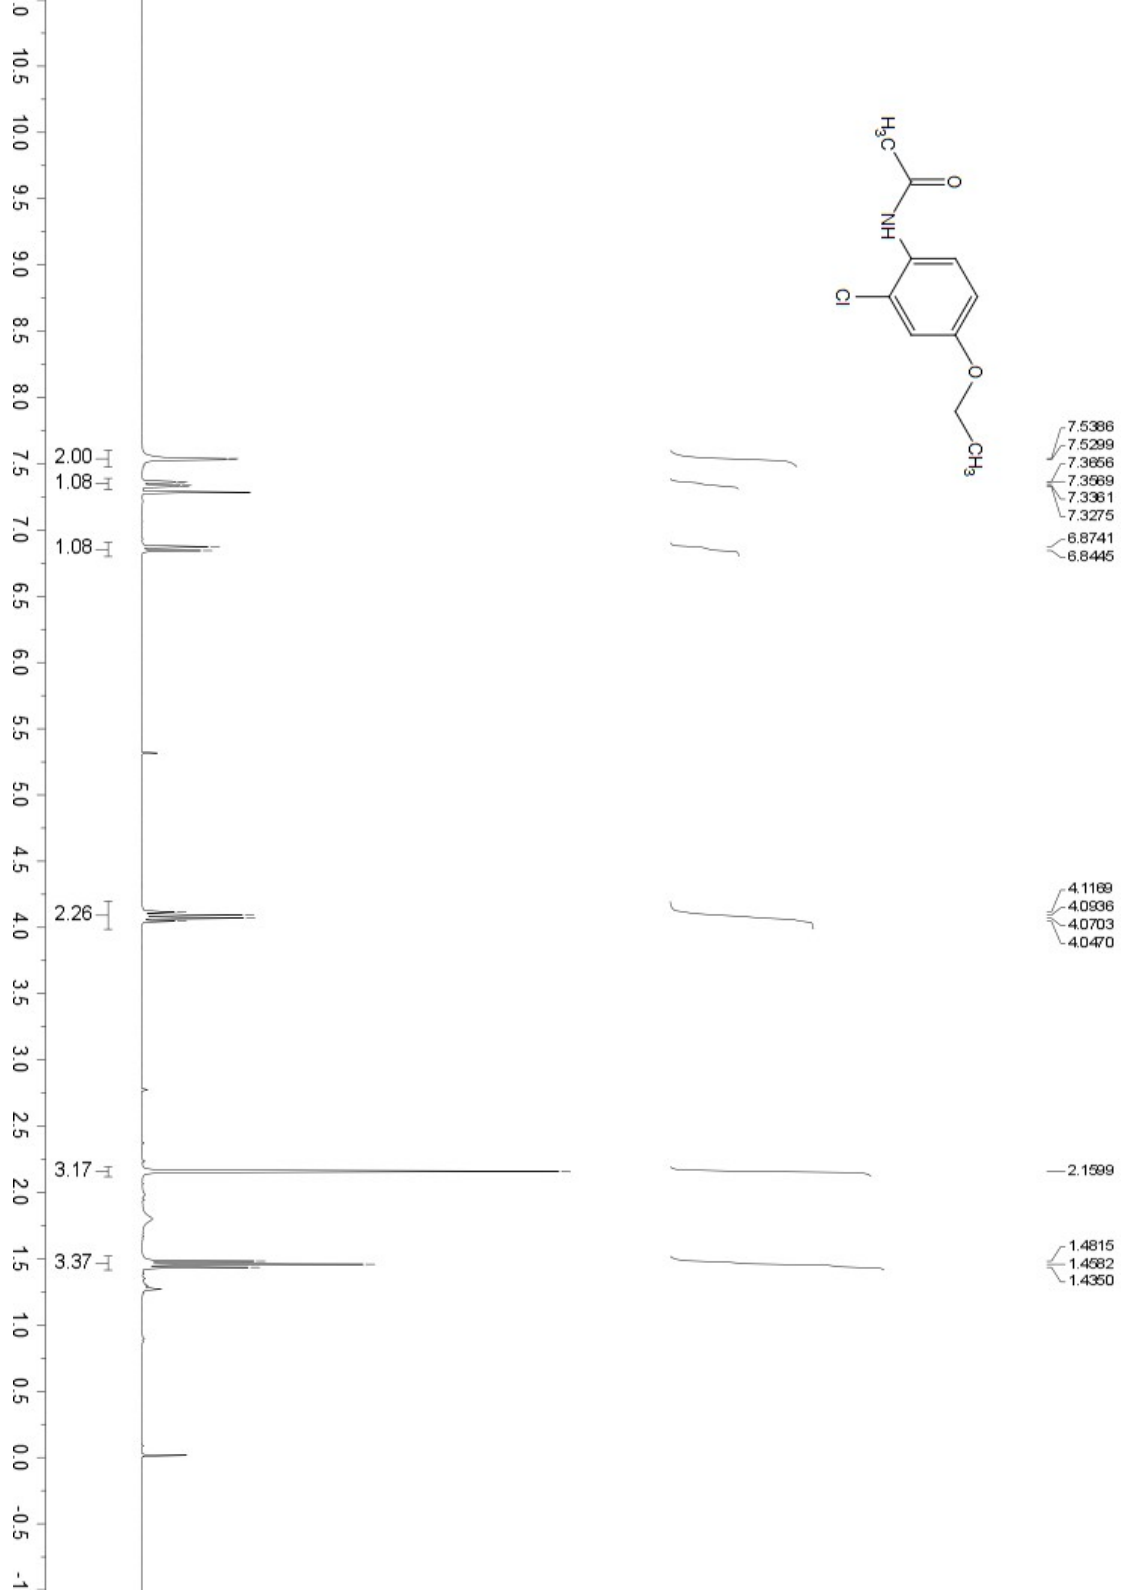

$^{13}\text{C}$  NMR of 4e

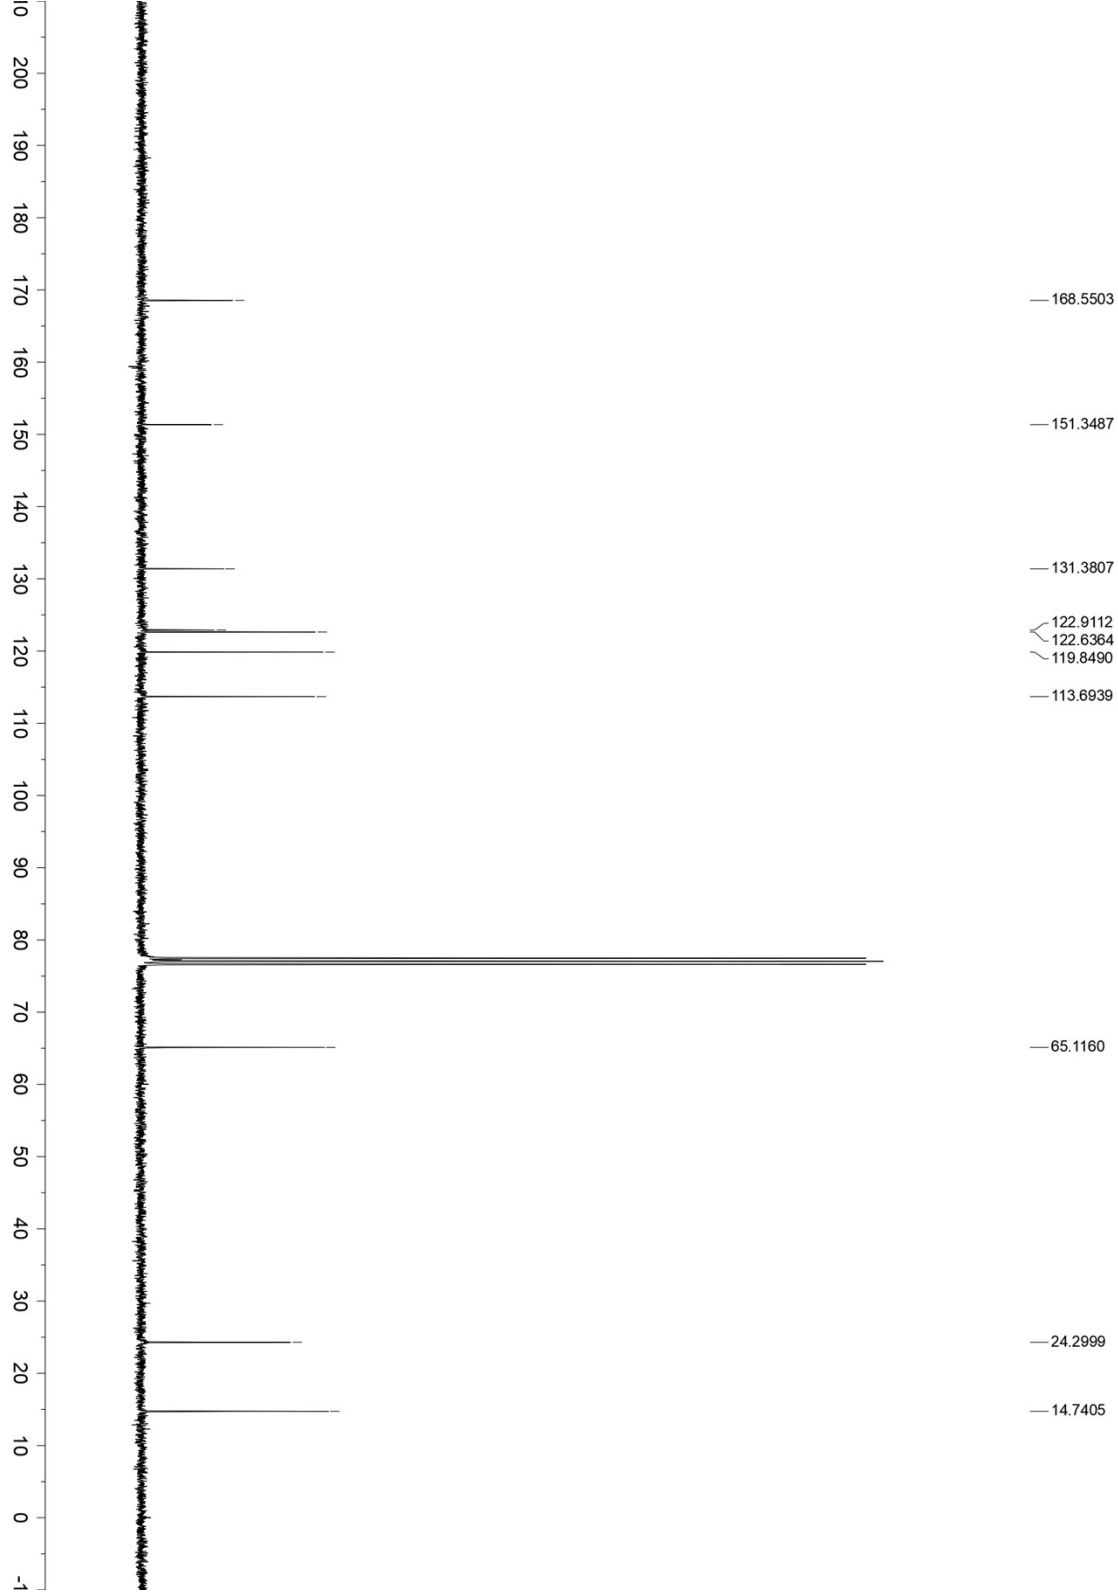

<sup>1</sup>H NMR of 4e'

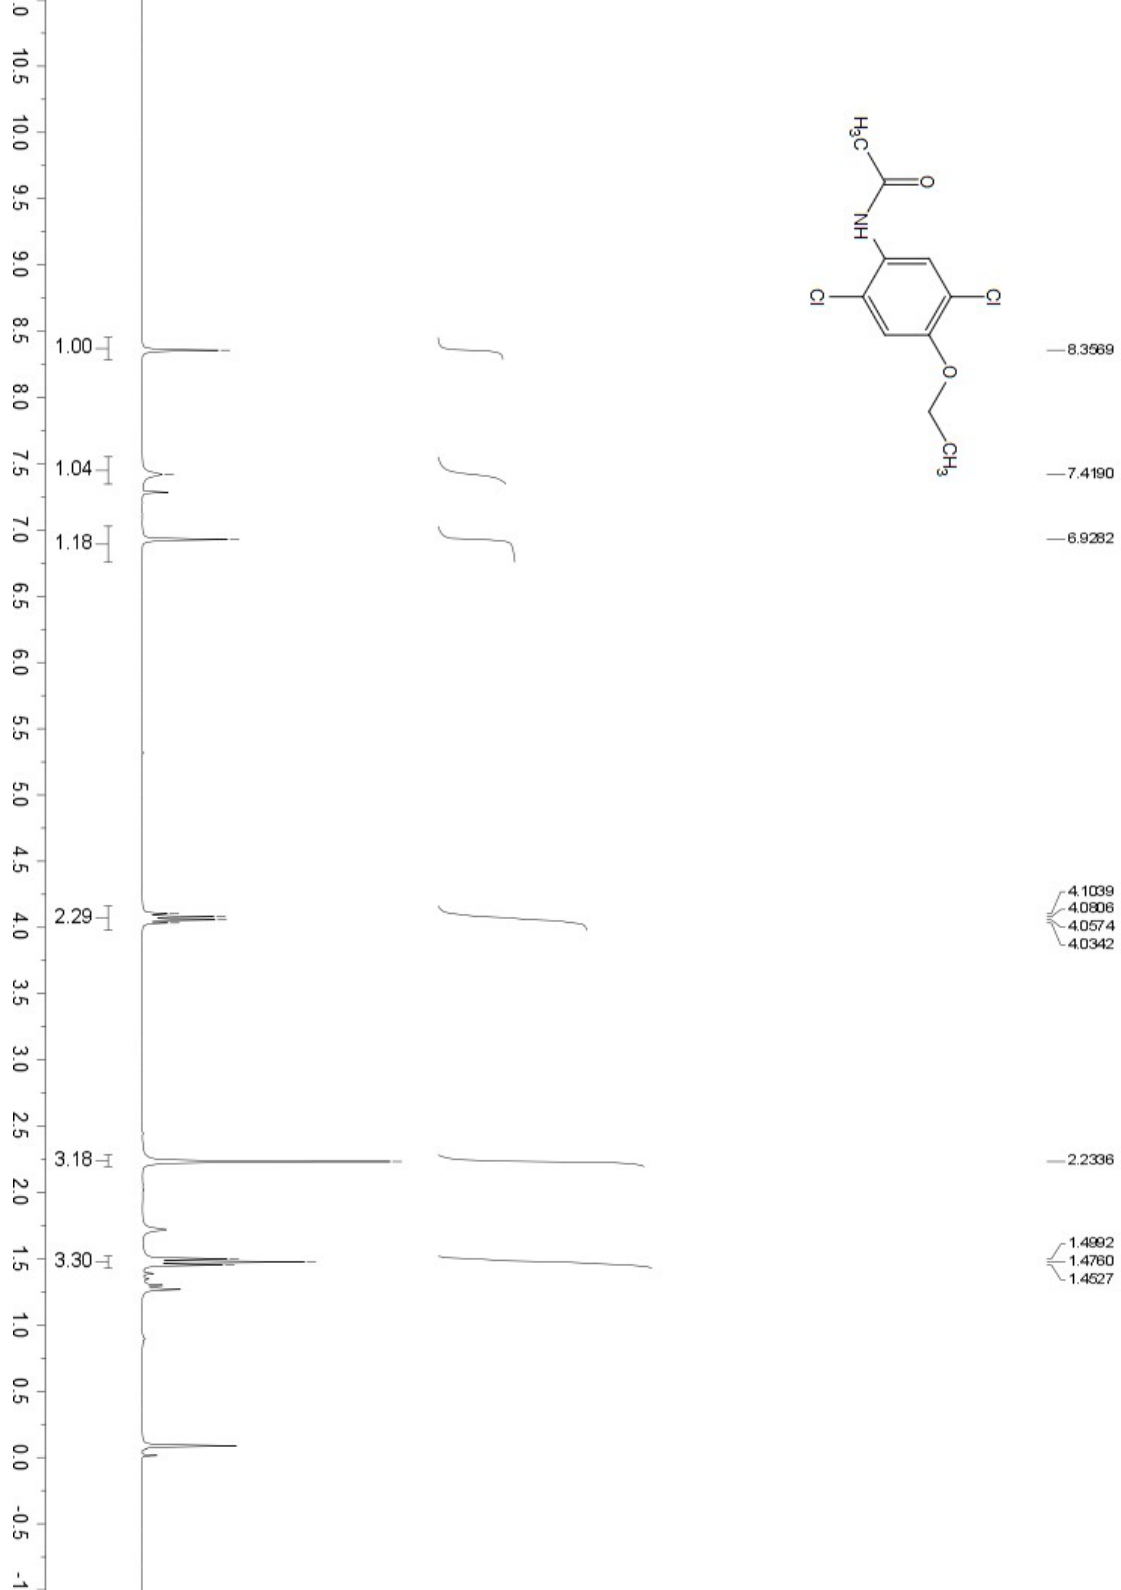

$^{13}\text{C}$  NMR of 4e'

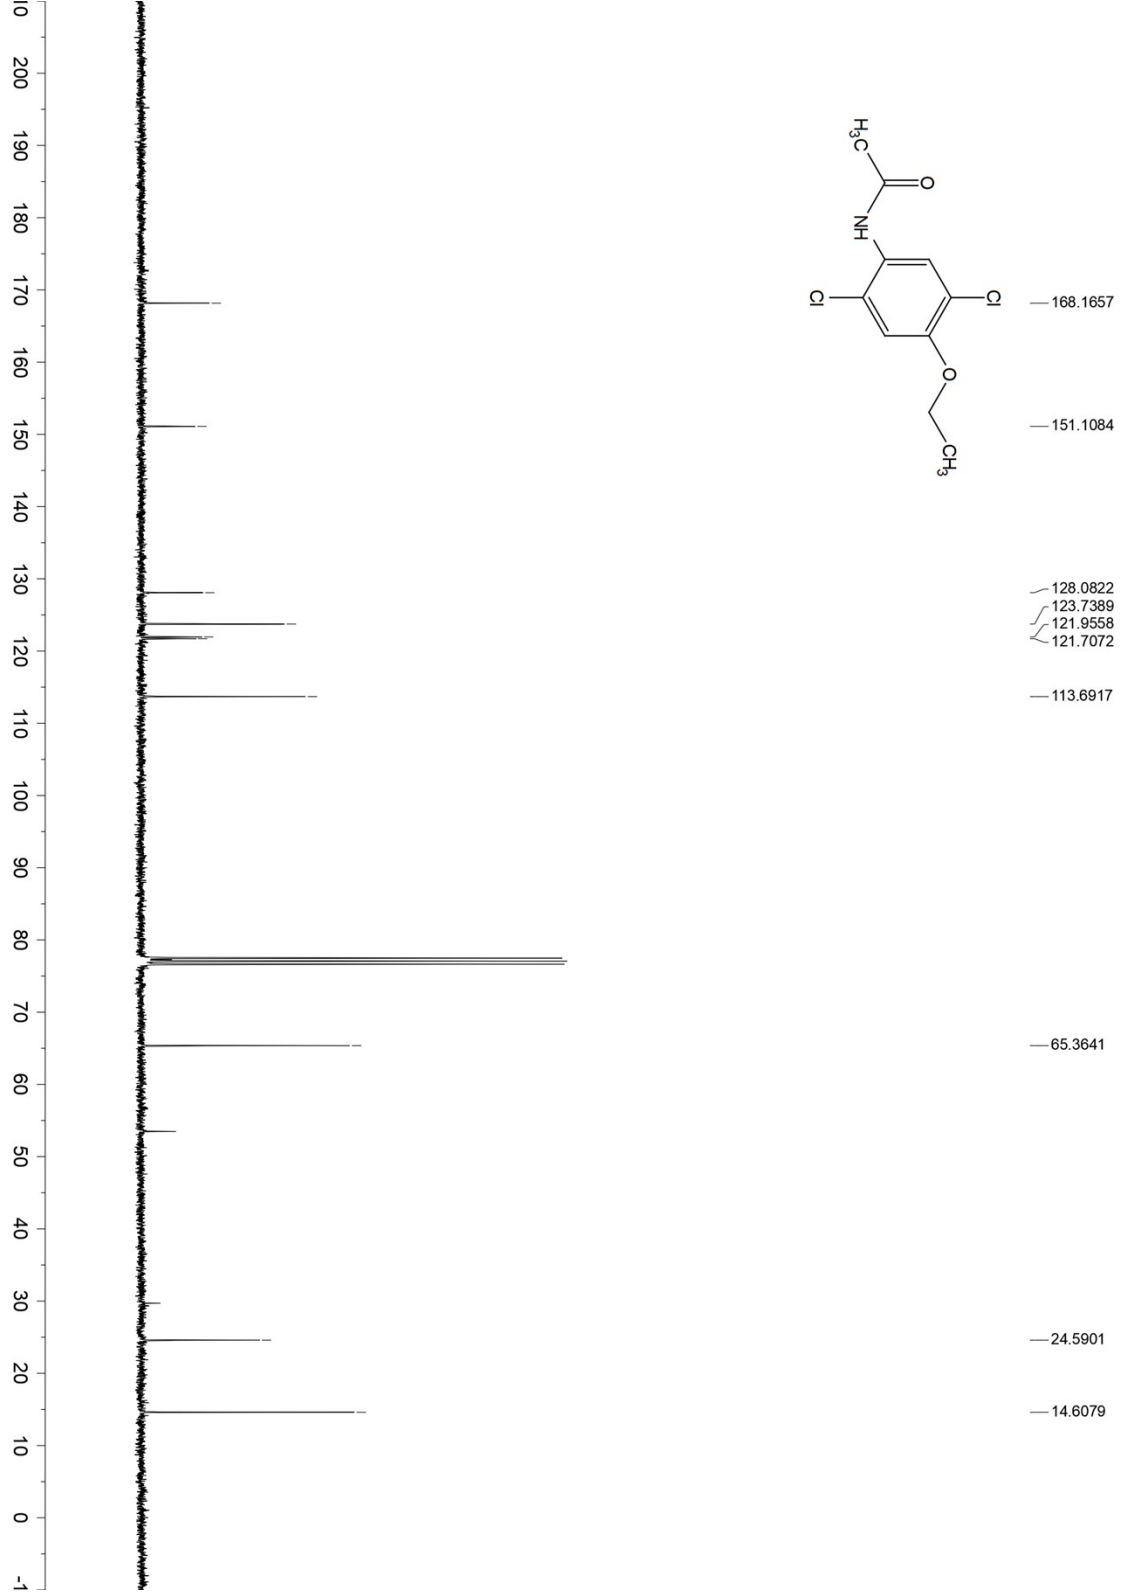

<sup>1</sup>H NMR of 4f

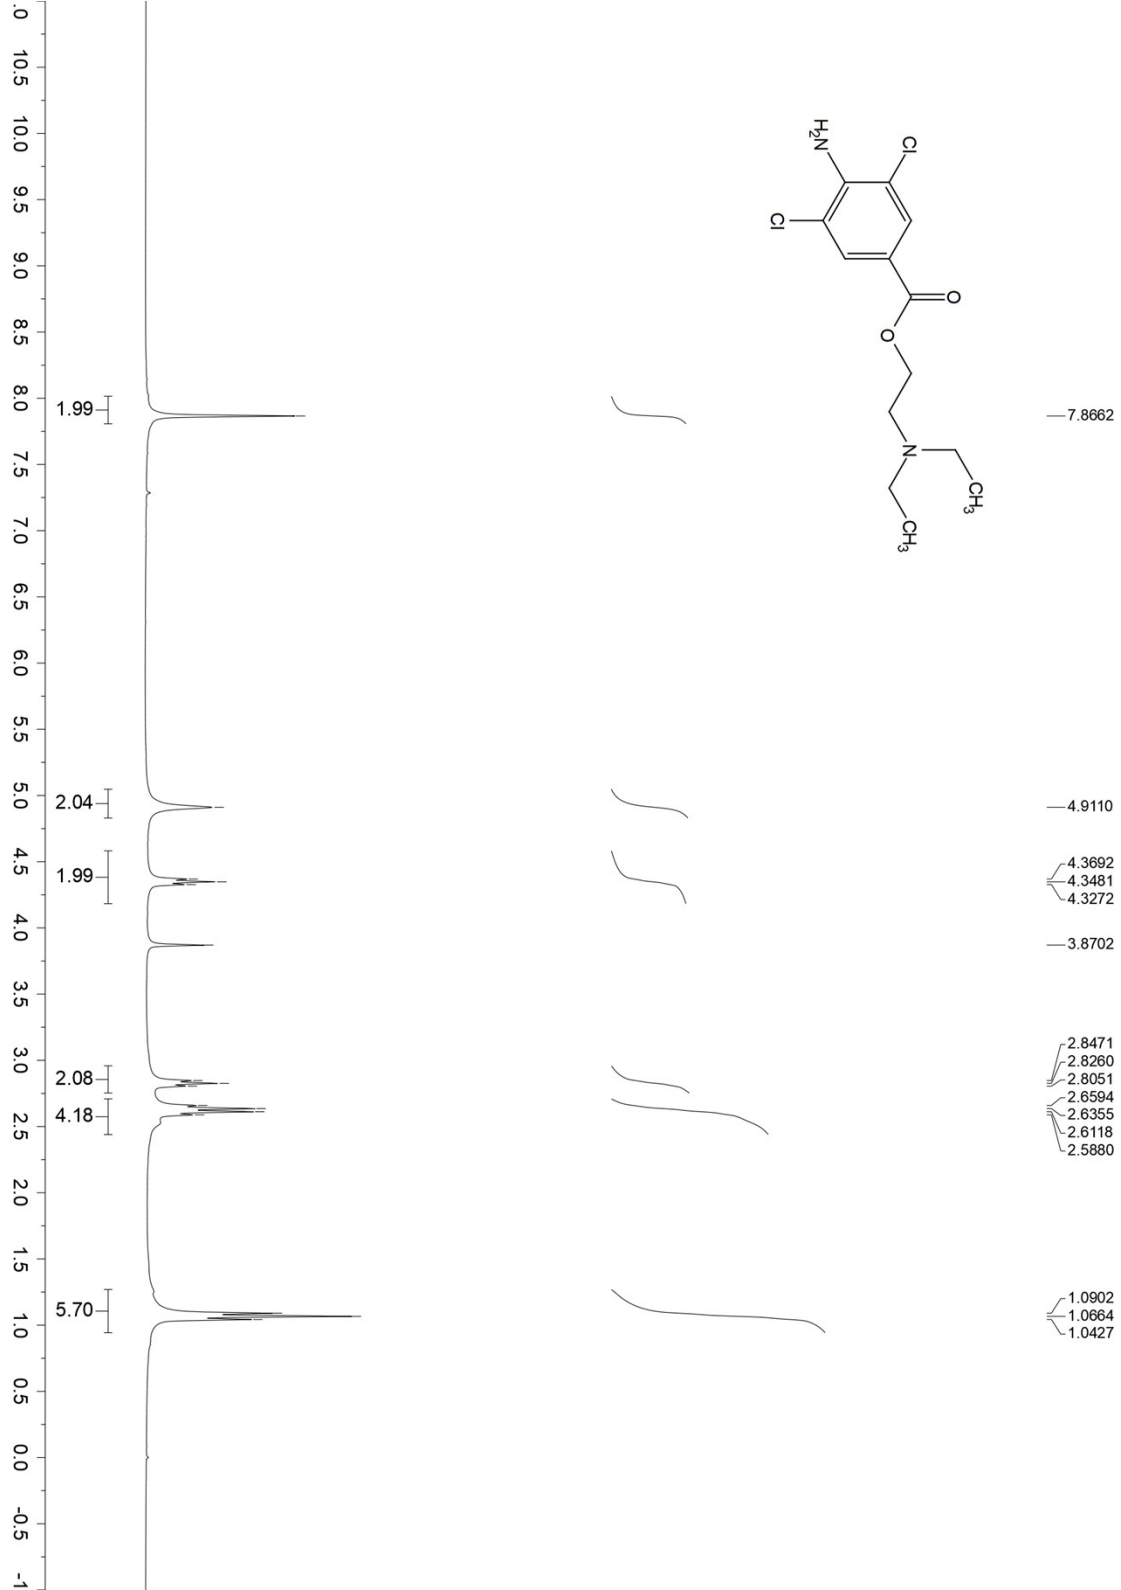

$^{13}\text{C}$  NMR of 4f

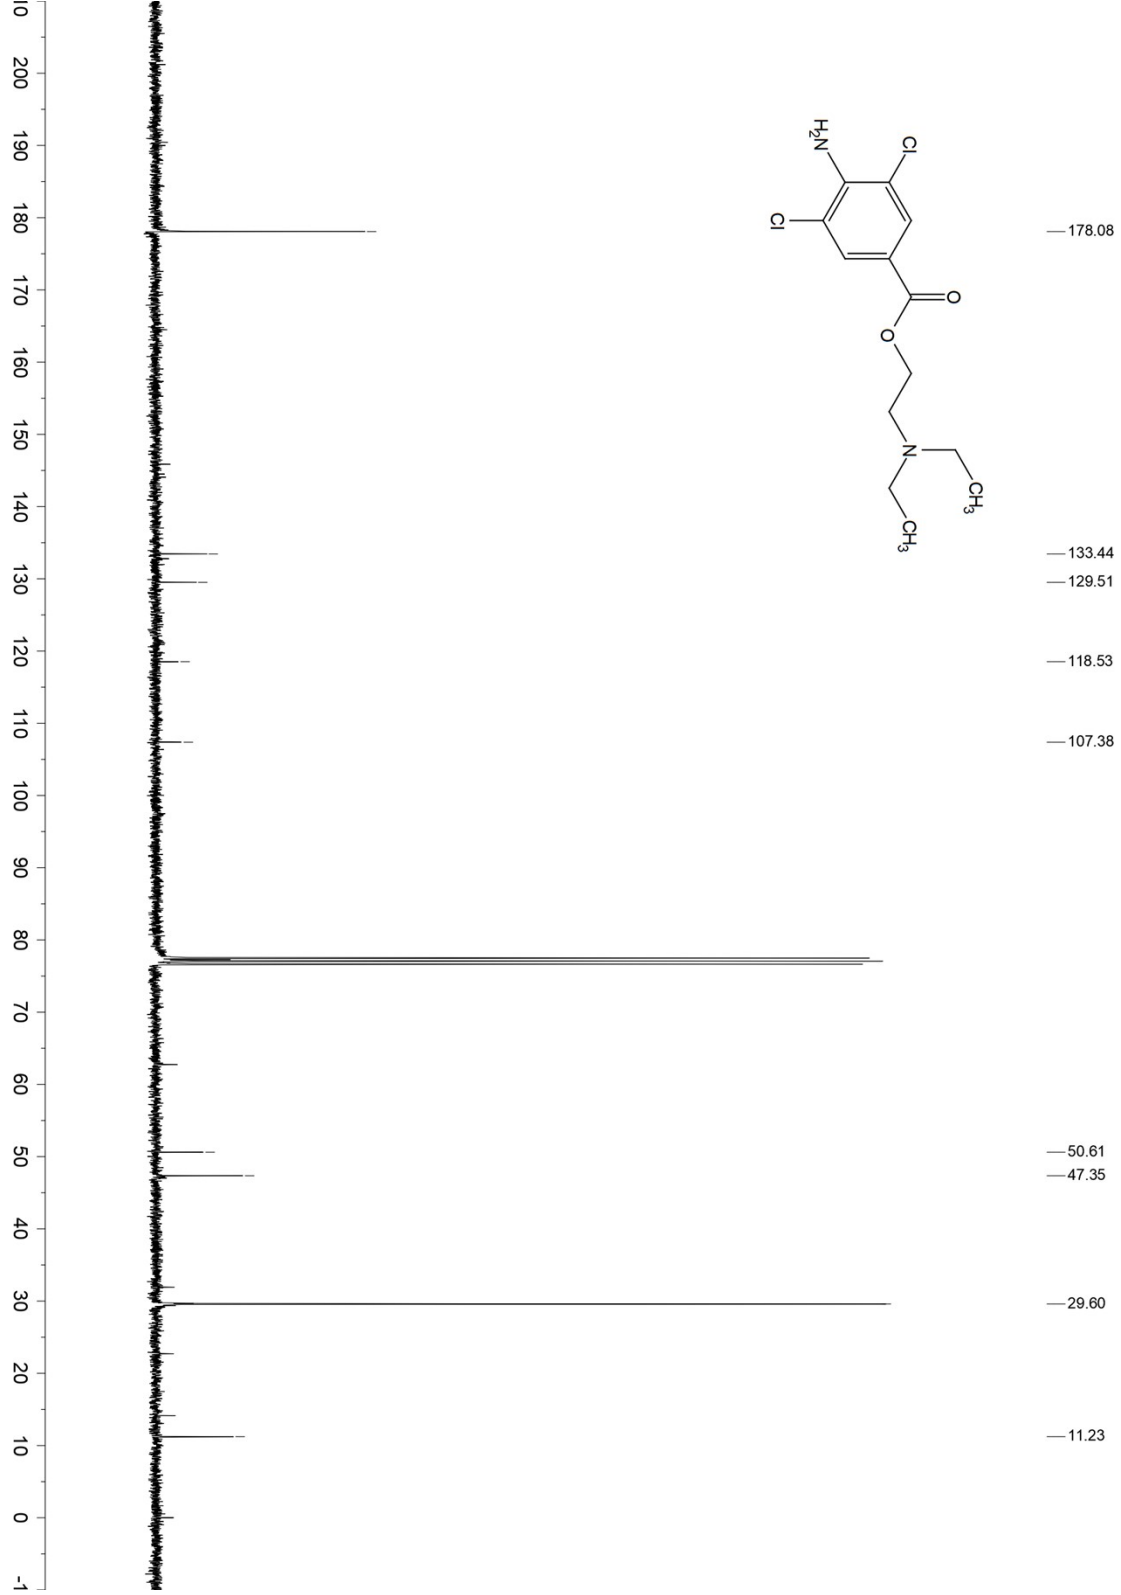

<sup>1</sup>H NMR of 4g

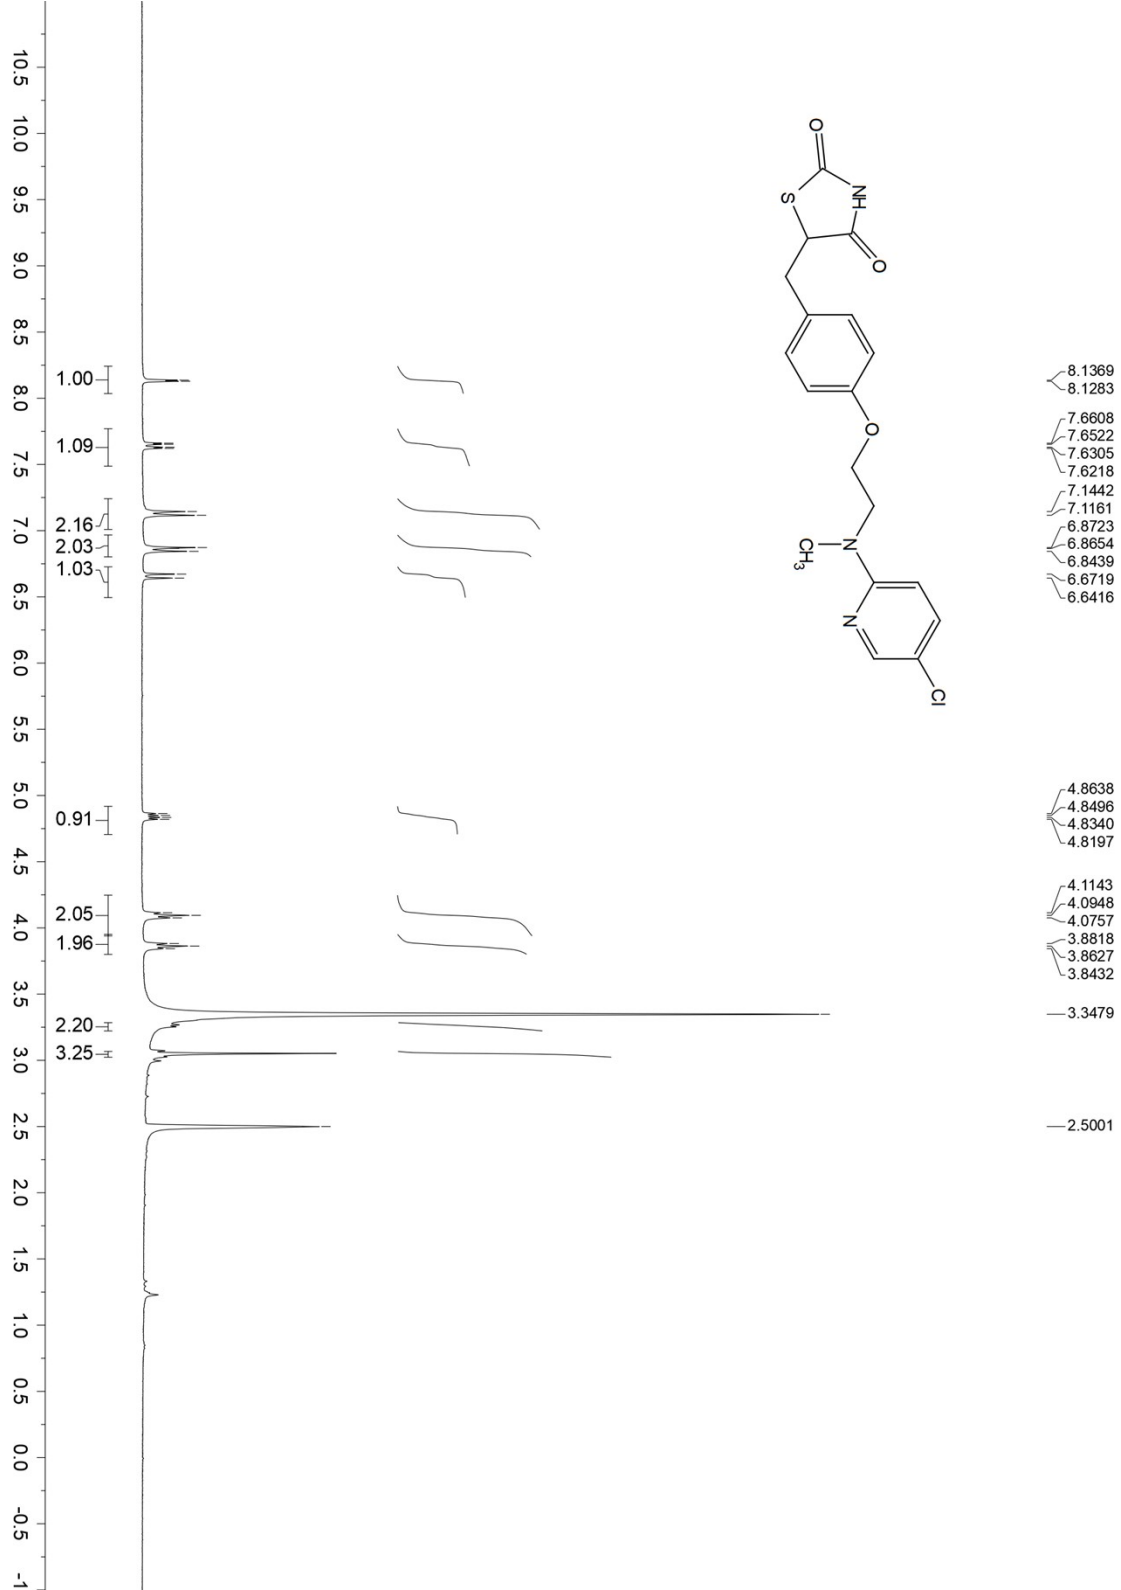

<sup>13</sup>C NMR of 4g

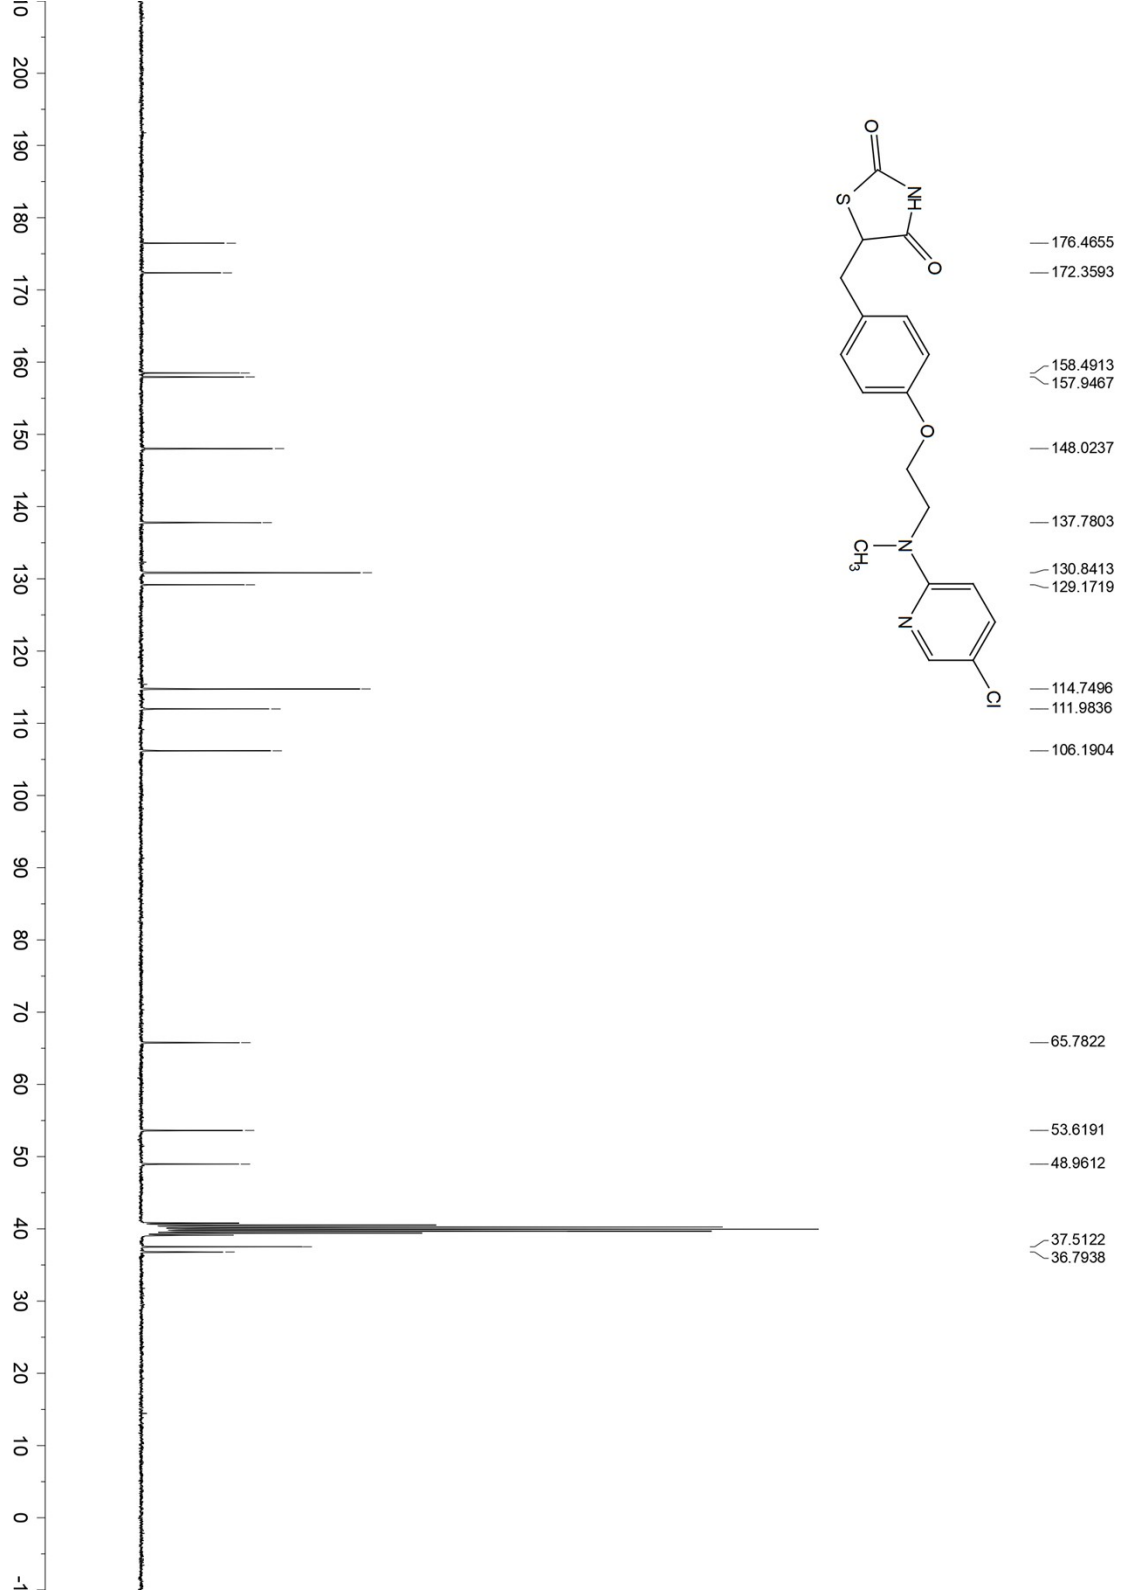



<sup>1</sup>H NMR of 4h

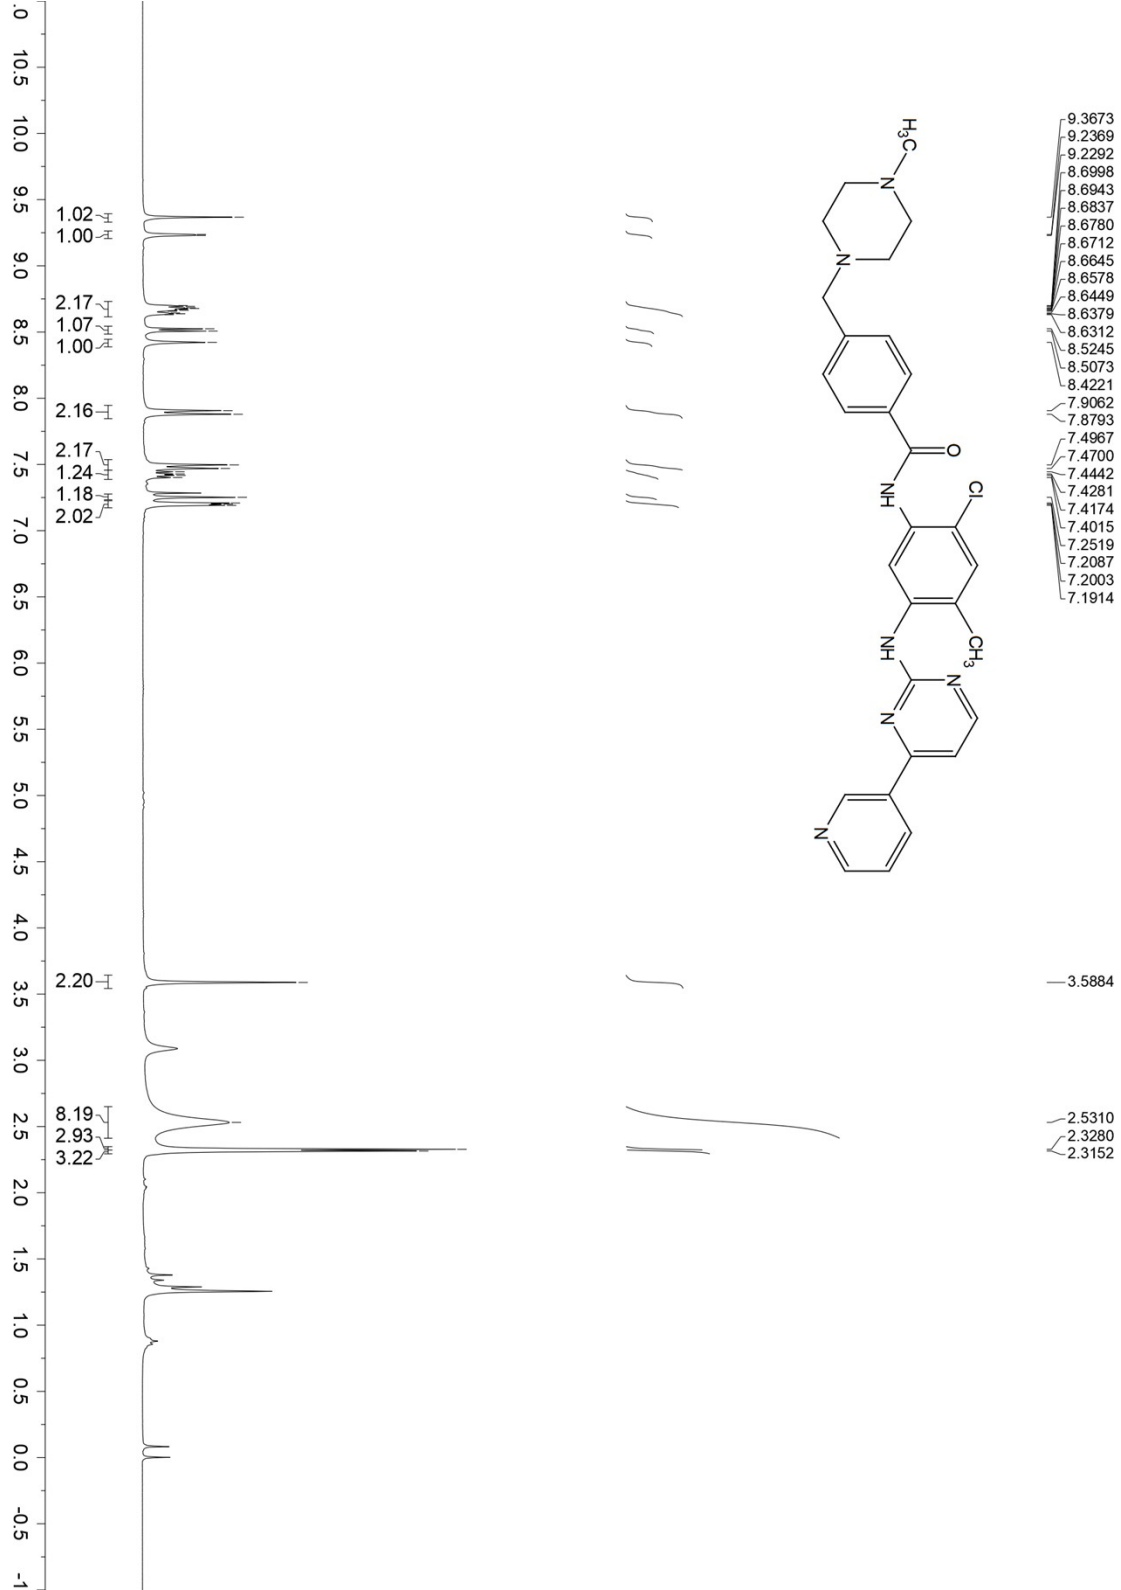

<sup>13</sup>C NMR of 4h

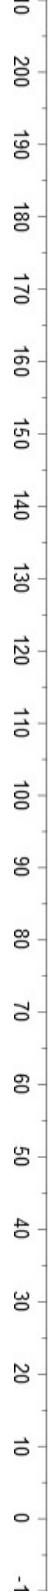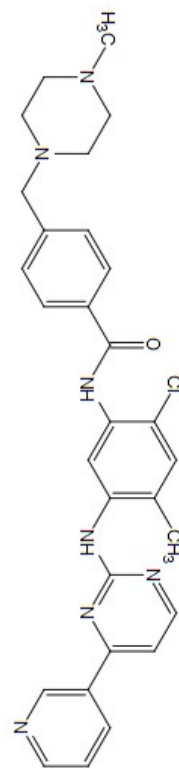

- 164.8720
- 162.8179
- 160.4628
- 159.1701
- 151.4191
- 148.4575
- 142.8358
- 136.8657
- 135.4241
- 133.5815
- 132.8827
- 132.6765
- 130.1191
- 129.5037
- 127.1012
- 125.5199
- 123.8652
- 117.2327
- 114.4838
- 108.5371
- 62.4301
- 54.9721
- 52.8627
- 45.8330
- 17.8597

<sup>1</sup>H NMR of 5a

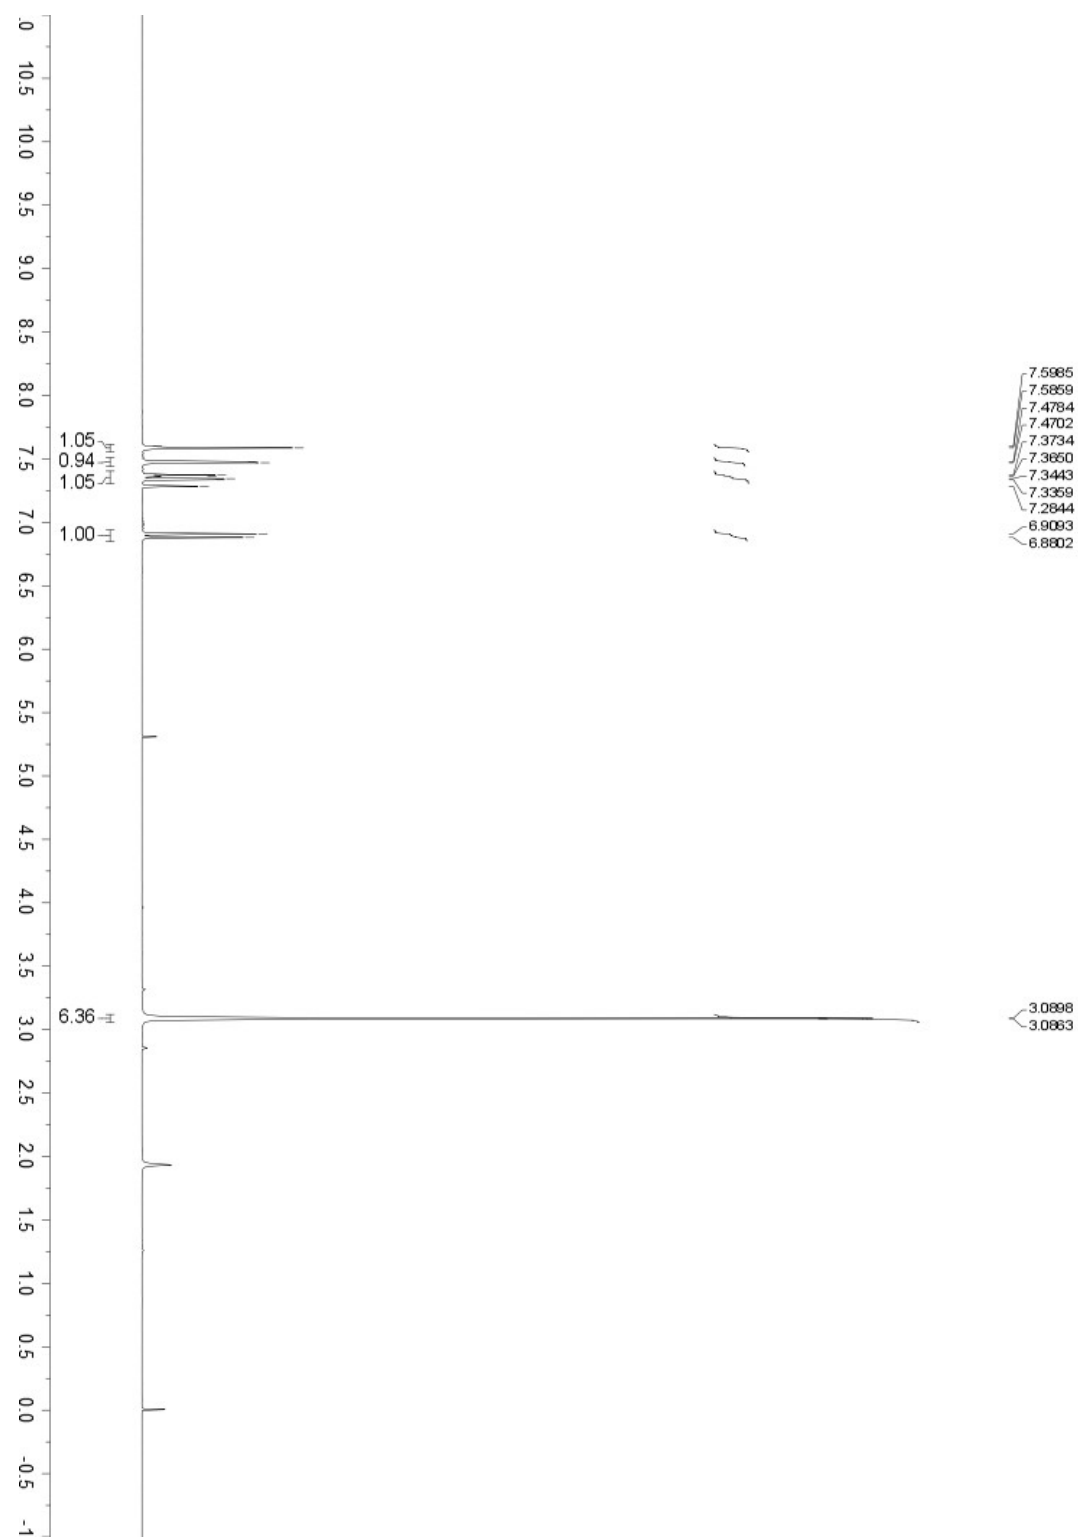

<sup>13</sup>C NMR of 5a

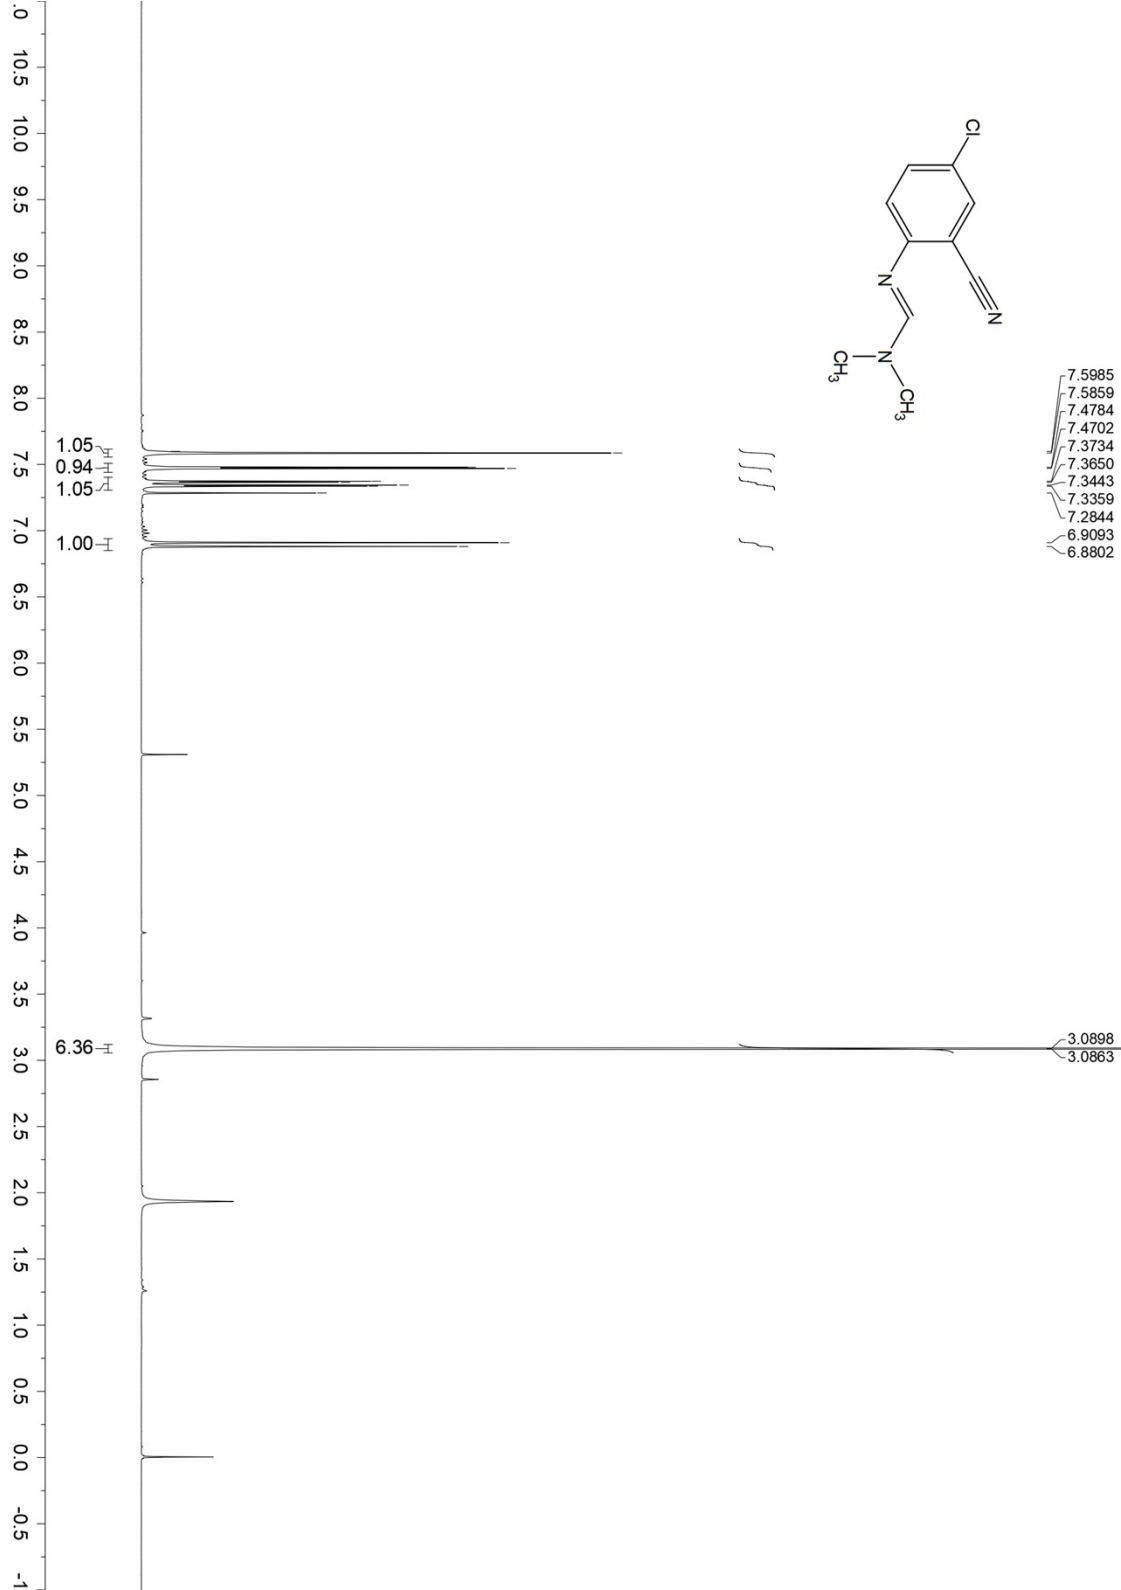

<sup>1</sup>H NMR of 6a

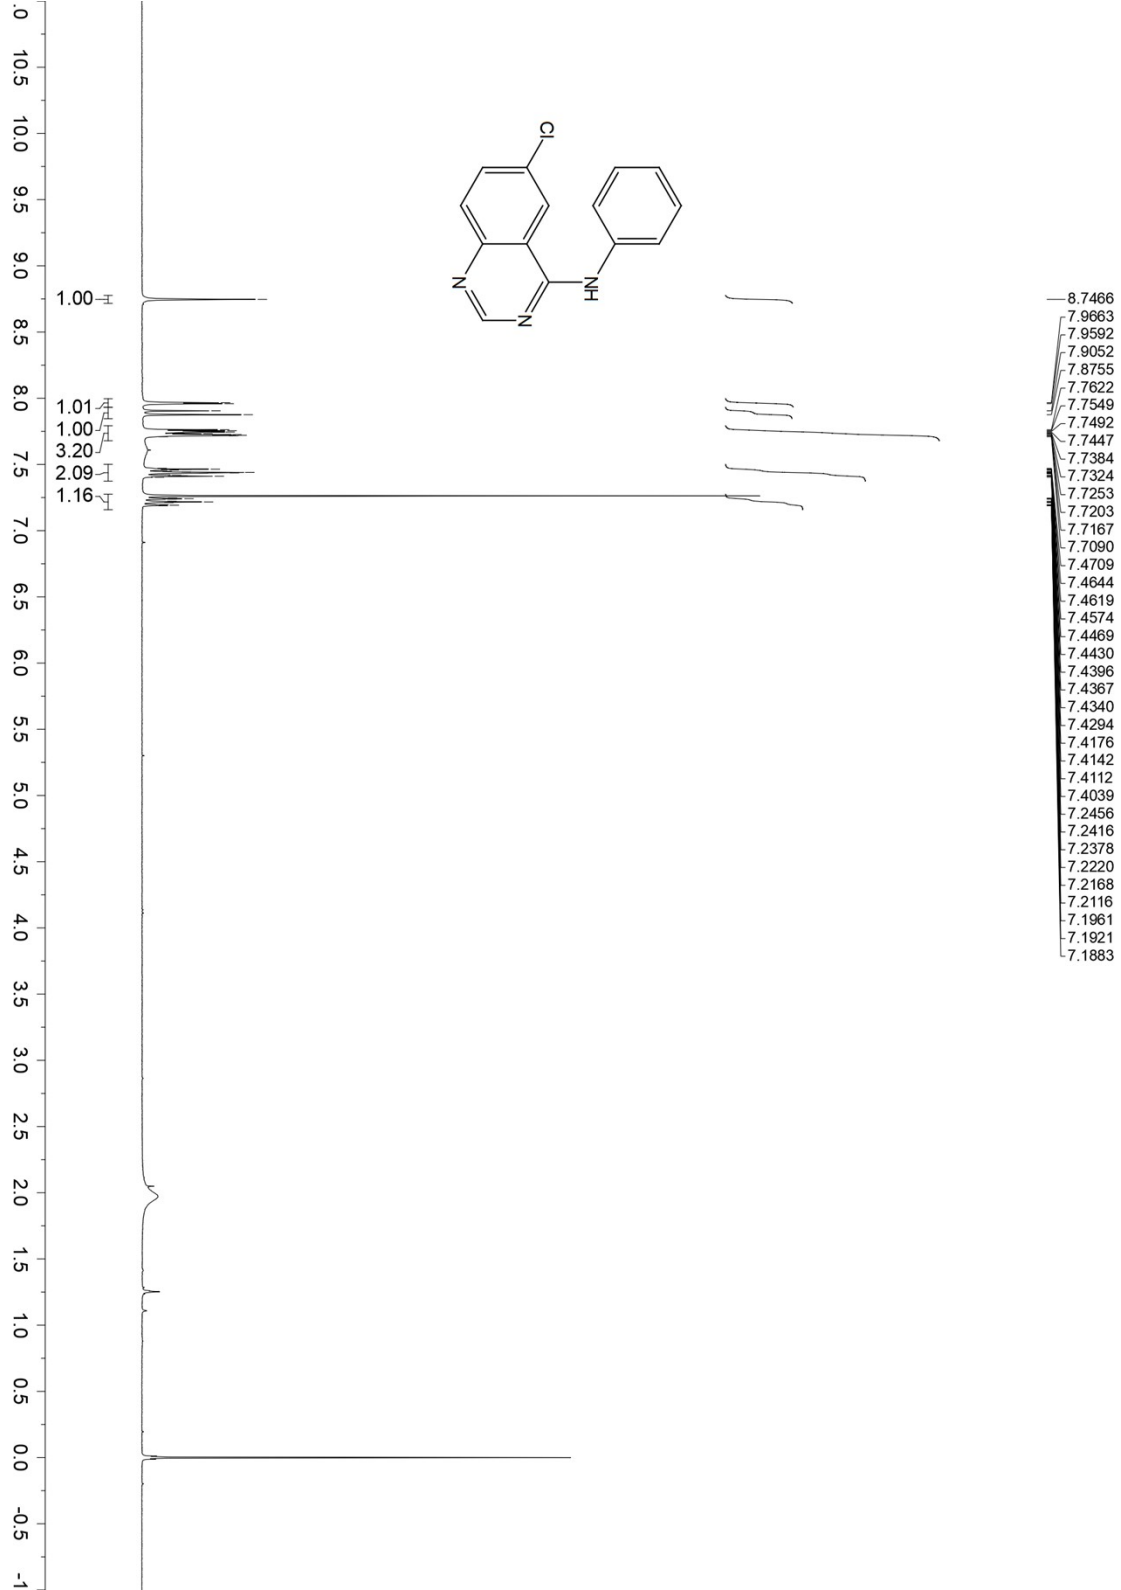

<sup>13</sup>C NMR of 6a

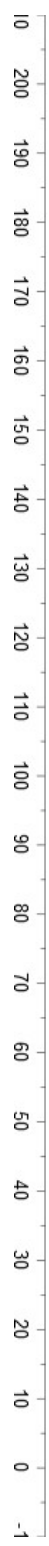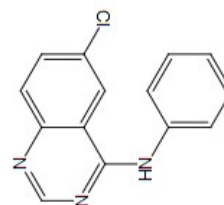

- 156.7956
- 155.1040
- 148.4083
- 137.7280
- 133.7862
- 132.2331
- 130.6005
- 129.2332
- 125.0889
- 122.1053
- 119.9404
- 115.8006

<sup>1</sup>H NMR of 6b

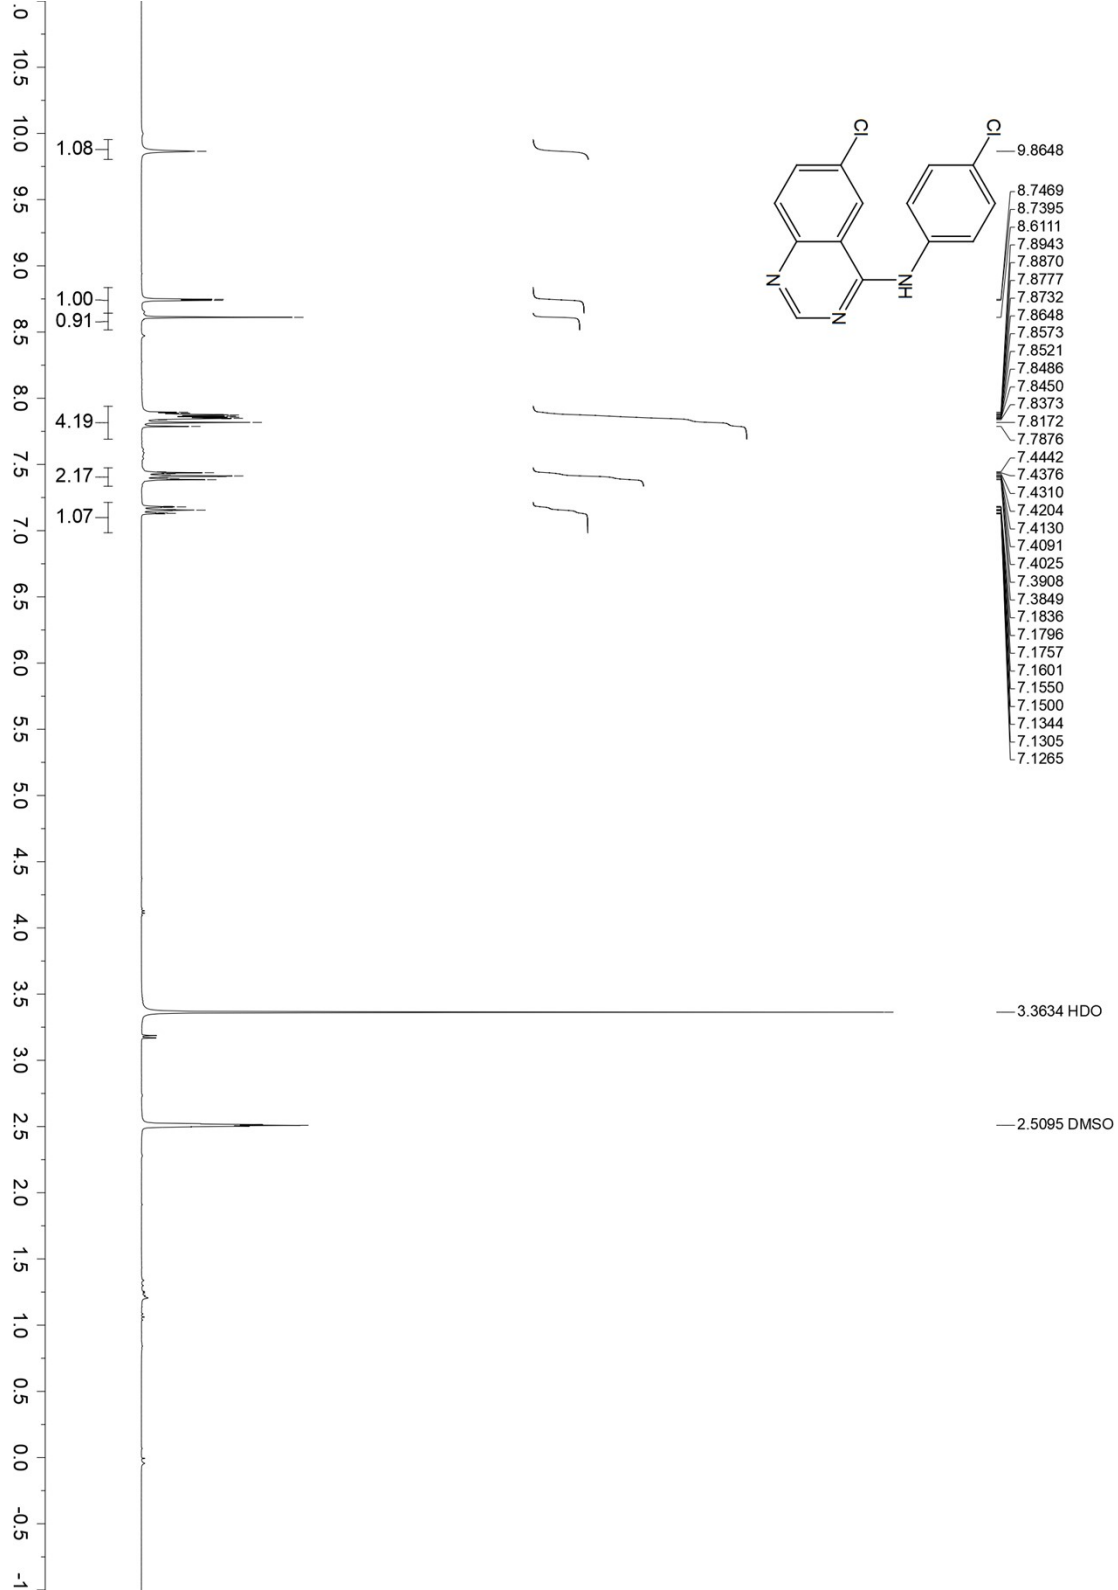

<sup>13</sup>C NMR of 6b

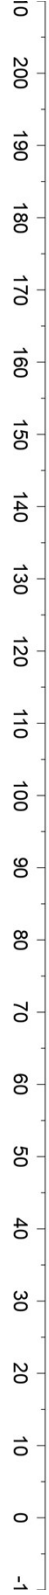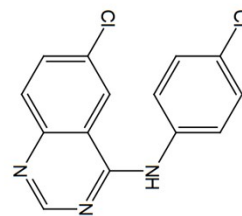

- 157.4937
- 155.3567
- 148.8481
- 139.3471
- 133.8483
- 130.8959
- 130.4525
- 128.9695
- 124.4306
- 122.8740
- 122.8010
- 116.4572



## 8. References

1. J. H. Lee, B. S. Lee, H. Shin, D. H. Nam and D. Y. Chi, *Synlett*, 2006, **51**, 65–68.
2. M. A. B. Mostafa, R. M. Bowley, D. T. Racys, M. C. Henry and A. Sutherland, *J Org Chem*, 2017, **82**, 7529-7537.
3. J. S. Barber, A. Burtea, M. R. Collins, M. Tran-Dubé, R. L. Patman, S. Scales, G. Smith, J. E. Spangler, F. Wang, W. Wang, S. Yang, J. Zhu and T. P. Montgomery, *Org Lett*, 2020, **22**, 9047–9052.
4. D. A. Rogers, A. T. Bensalah, A. T. Espinosa, J. L. Hoerr, F. H. Refai, A. K. Pitzel, J. J. Alvarado and A. A. Lamar, *Org Lett*, 2019, **21**, 4229-4233.
5. L. Lu, Y. Li and X. Jiang, *Green Chemistry*, 2020, **22**, 5989-5994.
6. A. Granados, Z. Jia, M. Del Olmo and A. Vallribera, *Eur. J. Org. Chem.*, 2019, **2019**, 2812–2818.
7. R. P. Wexler, P. Nuhant, T. J. Senter and Z. J. Gale-Day, *Org Lett*, 2019, **21**, 4540-4543.
8. Z. Lu, Q. Li, M. Tang, P. Jiang, H. Zheng and X. Yang, *Chem Commun (Camb)*, 2015, **51**, 14852-14855.
9. J. H. Lee, B. S. Lee, H. K. Shin, D. H. Nam and D. Y. J. C. Chi, 2006, 37.
10. S. Song, X. Li, J. Wei, W. Wang, Y. Zhang, L. Ai, Y. Zhu, X. Shi, X. Zhang and N. Jiao, *Nature Catalysis*, 2019, **3**, 107-115.
11. E. H. Discekici, N. J. Treat, S. O. Poelma, K. M. Mattson, Z. M. Hudson, Y. Luo, C. J. Hawker and J. Read de Alaniz, *Chem Commun (Camb)*, 2015, **51**, 11705–11708.
